# Supplementary material for: Protecting group-directed annulations of tetra-substituted oxindole olefins and sulfur ylides: regio- and chemoselective synthesis of cyclopropane- and dihydrofuran-fused spirooxindoles
Source: Royal Society of Chemistry journal article supplement (doi:10.1039/c9ra02192b), 2019-01-01

# Protecting group-directed annulations of tetra-substituted oxindole olefins and sulfur ylides: regio- and chemoselective synthesis of cyclopropane- and dihydrofuran-fused spirooxindoles

Jing-Wen Kang,<sup>‡a</sup> Xiang Li,<sup>‡a</sup> Fei-Yu Chen,<sup>a</sup> Yuan Luo,<sup>a</sup> Shu-Cang Zhang,<sup>a</sup> Bin Kang,<sup>a</sup> Cheng  
Peng,<sup>a</sup> Xu Tian<sup>\*b</sup> and Bo Han<sup>\*a</sup>

<sup>a</sup>State Key Laboratory of Southwestern Chinese Medicine Resources, School of Pharmacy, Chengdu  
University of Traditional Chinese Medicine, Chengdu 611137, China.

E-mail: hanbo@cdutcm.edu.cn

<sup>b</sup>Key Laboratory of Molecular Target & Clinical Pharmacology and the State Key Laboratory of  
Respiratory Disease, School of Pharmaceutical Sciences & the Fifth Affiliated Hospital, Guangzhou  
Medical University, Guangzhou 511436, P.R. China.

E-mail: xtian@gzhmu.edu.cn

‡ These authors contributed equally to this work.

## Supporting Information

### Table of Contents

|                                                                                   |     |
|-----------------------------------------------------------------------------------|-----|
| 1. General method .....                                                           | S2  |
| 2. Investigation of the influence of protecting groups (Table S1).....            | S2  |
| 3. General procedure for the synthesis of spirooxindole compounds <b>6</b> .....  | S6  |
| 4. General procedure for the synthesis of spirooxindole compounds <b>10</b> ..... | S12 |
| 5. Crystal data of <b>6r</b> and <b>10a</b> .....                                 | S19 |
| 6. NMR spectra and HPLC chromatograms .....                                       | S21 |

## 1. General method

NMR spectroscopic data were obtained for  $^1\text{H}$  at 400 MHz or  $^{13}\text{C}$  at 100 MHz, or for  $^1\text{H}$  at 600 MHz or  $^{13}\text{C}$  at 150 MHz. Chemical shifts were reported in parts per million (ppm) from tetramethylsilane utilizing solvent resonance in  $\text{CDCl}_3$  solution as the internal standard. ESI was performed on a Waters SYNAPT G2 as the ionization method. ESI-HRMS spectra were measured according to a Q-TOF instrument. Column chromatography was performed on silica gel (200–300 mesh) using an eluent of ethyl acetate and petroleum ether. Melting points were mensurated by a Mel-Temp apparatus, and were not accuracy in one hundred percent. All reactions were monitored by thin layer chromatography (TLC) with silica gelcoated paltes; and products were visualized using UV light.

## 2. Investigation of the influence of protecting groups (Table S1) <sup>a</sup>

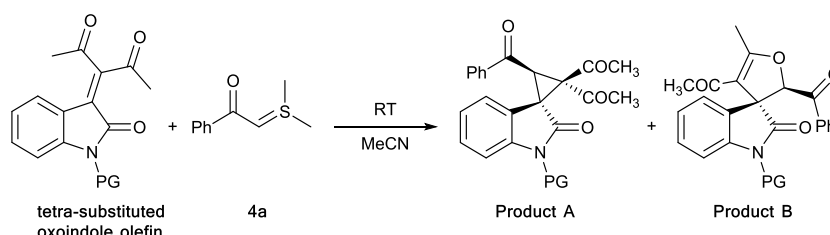

| Entry | PG    | Yield (%) <sup>b</sup> |  | d.r. <sup>c</sup> |
|-------|-------|------------------------|--|-------------------|
|       |       | product A/B            |  |                   |
| 1     | H     | 45/48                  |  | 8:1/10:1          |
| 2     | Me    | 10/44                  |  | 1:1/8:1           |
| 3     | Allyl | 12/45                  |  | 1:1/5:1           |
| 4     | Bn    | 19/48                  |  | 7:1/9:1           |
| 5     | Ac    | 36/11                  |  | 20:1/10:1         |
| 6     | Boc   | 48/21                  |  | 15:1/12:1         |

<sup>a</sup> Unless otherwise noted, all reactions were performed with tetra-sustituted oxindole olefin (0.15 mmol), **4a** (0.165 mmol) in 2 mL MeCN at room temperature for 2 h; <sup>b</sup> Isolated yields of the product **A** and **B**; <sup>c</sup> The diastereoselective ratio of the product **A** and **B** were calculated based on  $^1\text{H-NMR}$  analysis of the crude reaction mixture.

We screened a broad type of protecting groups including methyl (-Me), allyl, acetyl (-Ac), benzyl (-Bn) and tert-butyloxycarbonyl (-Boc) groups to investigate the influence on chemo- and regioselectivity. Generally, *N*-Bn and *N*-Boc substrates showed the best tendency on the synthesis of dihydrofuran- and cyclopropane-fused spirooxindole respectively (**B4/A6**) in 48% yields with high diastereoselectivities of 9:1 and up to 12:1 dr values (Table S1, entry 4 and 6). The tetra-

substituted oxindole olefins with *N*-Me and *N*-Allyl protecting groups both produced cyclopropane-fused spirooxindoles **A2/A3** in low yields with very poor diastereoselective value of 1:1, while demonstrating good reaction performance for the synthesis of products **B2/B3** with 8:1 and 5:1 dr values (entry 2 and 3). Besides, in spite of high diastereoselectivity, *N*-Ac protected tetra-substituted oxindole olefin did not react well at this condition resulting products **A5/B5** in a low yield (entry 5). Hence, we chose *N*-Bn- and *N*-Boc-protected oxindole olefins as model substrates for the construction of desirable dihydrofuran- and cyclopropane-fused spirooxindoles respectively.

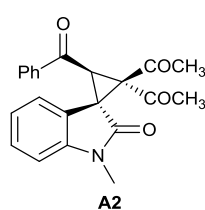

**A2** was obtained according to the similar procedure. White solid, 10% yield (5.4 mg). The diastereomeric ratio was determined to be 1:1 by crude <sup>1</sup>H-NMR analysis. m.p. 158–159 °C; <sup>1</sup>H NMR (600 MHz, CDCl<sub>3</sub>) δ (ppm) 7.78 (dd, *J* = 8.4, 1.2 Hz, 2H), 7.51 (tt, *J* = 7.8, 1.2 Hz, 1H), 7.44 – 7.41 (m, 2H), 7.29 (td, *J* = 7.8, 1.2 Hz, 1H), 6.99 (td, *J* = 7.8, 0.6 Hz, 1H), 6.89 (dd, *J* = 15.0, 7.8 Hz, 2H), 4.25 (s, 1H), 3.16 (s, 3H), 2.58 (s, 3H), 2.07 (s, 3H); <sup>13</sup>C NMR (150 MHz, CDCl<sub>3</sub>) δ (ppm) 198.1, 192.2, 169.5, 144.3, 136.5, 133.7, 129.3, 128.9, 128.6, 128.3, 126.5, 122.6, 120.6, 108.7, 63.5, 43.5, 40.9, 32.3, 29.9, 28.9, 27.0; ESI HRMS: calcd. For C<sub>22</sub>H<sub>19</sub>NO<sub>4</sub>Na<sup>+</sup> 384.1212, found 384.1214.

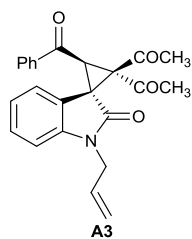

**A3** was obtained according to the similar procedure. White solid, 12% yield (7.0 mg). The diastereomeric ratio was determined to be 1:1 by crude <sup>1</sup>H-NMR analysis. m.p. 159–160 °C; <sup>1</sup>H NMR (600 MHz, CDCl<sub>3</sub>) δ (ppm) 7.76 (dd, *J* = 8.4, 1.2 Hz, 2H), 7.52 – 7.48 (m, 1H), 7.44 – 7.40 (m, 2H), 7.24 (td, *J* = 7.8, 1.2 Hz, 1H), 6.97 (td, *J* = 7.2, 0.6 Hz, 1H), 6.86 (d, *J* = 3.0 Hz, 1H), 5.67 – 5.61 (m, 1H), 5.30 (s, 1H), 5.08 (dt, *J* = 10.8, 1.2 Hz, 2H), 4.40 – 4.36 (m, 1H), 4.25 – 4.23 (m, 2H), 2.61 (s, 3H), 2.36 (s, 3H); <sup>13</sup>C NMR (150 MHz, CDCl<sub>3</sub>) δ (ppm) 198.2, 197.9, 192.1, 171.6, 143.5, 131.0, 129.2, 128.9, 128.7, 128.3, 126.5, 122.5, 120.7, 117.9, 109.6, 63.6, 43.6, 42.7, 29.9, 28.4; ESI HRMS: calcd. For C<sub>24</sub>H<sub>21</sub>NO<sub>4</sub>Na<sup>+</sup> 410.1368, found 410.1366.

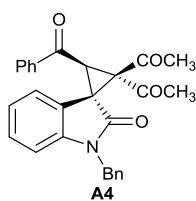

**A4** was obtained according to the similar procedure. White solid, 19% yield (12.5 mg). The diastereomeric ratio was determined to be 7:1 by crude  $^1\text{H-NMR}$  analysis. m.p. 147–148 °C;  $^1\text{H NMR}$  (600 MHz,  $\text{CDCl}_3$ )  $\delta$  (ppm) 7.86 (dd,  $J = 8.4, 1.2$  Hz, 2H), 7.55 (t,  $J = 7.8$  Hz, 1H), 7.40 (t,  $J = 7.8$  Hz, 2H), 7.33 – 7.30 (m, 2H), 7.29 (d,  $J = 6.6$  Hz, 3H), 7.17 (td,  $J = 7.8, 1.2$  Hz, 1H), 7.02 (d,  $J = 7.8$  Hz, 1H), 6.95 (td,  $J = 7.8, 1.2$  Hz, 1H), 6.81 (d,  $J = 7.8$  Hz, 1H), 5.02 (d,  $J = 15.6$  Hz, 1H), 4.95 (d,  $J = 15.6$  Hz, 1H), 4.31 (s, 1H), 2.38 (s, 3H), 2.25 (s, 3H);  $^{13}\text{C NMR}$  (150 MHz,  $\text{CDCl}_3$ )  $\delta$  (ppm) 198.0, 196.3, 192.0, 171.9, 143.3, 136.5, 135.4, 134.1, 128.9, 128.8, 128.6, 128.5, 127.9, 127.3, 126.3, 122.5, 120.6, 109.3, 99.9, 62.5, 44.3, 43.8, 29.9, 28.4; HRMS (ESI)  $m/z$  calcd for  $\text{C}_{28}\text{H}_{23}\text{NO}_4\text{Na}^+$  460.1525, found 460.1526.

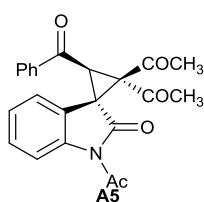

**A5** was obtained according to the similar procedure. White solid, 36% yield (21.0 mg). The diastereomeric ratio was determined to be 20:1 by crude  $^1\text{H-NMR}$  analysis. m.p. 169–170 °C;  $^1\text{H NMR}$  (600 MHz,  $\text{CDCl}_3$ )  $\delta$  (ppm) 8.27 (d,  $J = 7.8$  Hz, 1H), 7.89 (dd,  $J = 8.4, 1.2$  Hz, 2H), 7.60 – 7.56 (m, 1H), 7.47 – 7.42 (m, 2H), 7.33 – 7.29 (m, 1H), 7.11 (td,  $J = 7.8, 0.6$  Hz, 1H), 7.05 (dd,  $J = 7.8, 1.2$  Hz, 1H), 4.29 (s, 1H), 2.69 (s, 3H), 2.36 (s, 3H), 2.28 (s, 3H);  $^{13}\text{C NMR}$  (150 MHz,  $\text{CDCl}_3$ )  $\delta$  (ppm) 197.7, 195.7, 191.5, 173.5, 170.3, 140.9, 136.5, 134.4, 129.2, 129.0, 128.5, 125.9, 124.9, 120.0, 116.2, 63.2, 44.5, 43.2, 29.9, 28.5, 27.1; ESI HRMS: calcd. For  $\text{C}_{23}\text{H}_{19}\text{NO}_5\text{Na}^+$  412.1162, found 412.1164.

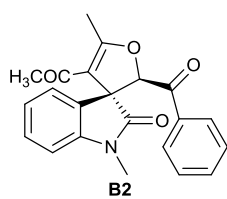

**B2** was obtained according to the similar procedure. White solid, 44% yield (23.9 mg). The diastereomeric ratio was determined to be 8:1 by crude  $^1\text{H-NMR}$  analysis. m.p. 163–164 °C;  $^1\text{H NMR}$  (600 MHz,  $\text{CDCl}_3$ )  $\delta$  (ppm) 7.40 (tt,  $J = 7.2, 1.8$  Hz, 1H), 7.22 – 7.17 (m, 4H), 7.04 (ddd,  $J = 7.2, 6.6, 2.4$  Hz, 1H), 6.92 – 6.89 (m, 2H), 6.31 (d,  $J = 7.8$  Hz, 1H), 6.25 (s, 1H), 2.97 (s, 3H), 2.54 (s, 3H), 2.09 (s, 3H);  $^{13}\text{C NMR}$  (150 MHz,  $\text{CDCl}_3$ )  $\delta$  (ppm) 192.9, 191.3, 117.0, 170.1, 142.7, 135.0, 133.4, 129.1, 128.2, 127.4, 127.0, 124.5, 122.9, 118.1, 107.6, 89.3, 61.9, 28.9, 26.5, 15.9; ESI HRMS: calcd. For  $\text{C}_{22}\text{H}_{19}\text{NO}_4\text{Na}^+$  384.1212, found 384.1210.

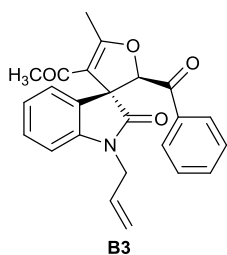

**B3** was obtained according to the similar procedure, white solid, 45% yield (26.2 mg). The diastereomeric ratio was determined to be 5:1 by crude  $^1\text{H}$ -NMR analysis. m.p. 159–160 °C;  $^1\text{H}$  NMR (600 MHz,  $\text{CDCl}_3$ )  $\delta$  (ppm) 7.42 (t,  $J = 7.2$  Hz, 1H), 7.24 (d,  $J = 7.2$  Hz, 2H), 7.20 (t,  $J = 7.8$  Hz, 2H), 7.01 (td,  $J = 7.2, 0.6$  Hz, 1H), 6.93 (d,  $J = 6.6$  Hz, 1H), 6.91 – 6.87 (m, 1H), 6.35 (d,  $J = 7.8$  Hz, 1H), 6.27 (s, 1H), 5.68 – 5.62 (m, 1H), 5.28 (dd,  $J = 17.4, 0.6$  Hz, 1H), 5.15 (d,  $J = 10.2$  Hz, 1H), 4.39 (dd,  $J = 16.2, 4.8$  Hz, 1H), 3.76 (dd,  $J = 16.2, 5.4$  Hz, 1H), 2.55 (s, 3H), 2.13 (s, 3H);  $^{13}\text{C}$  NMR (150 MHz,  $\text{CDCl}_3$ )  $\delta$  (ppm) 193.0, 191.1, 176.8, 170.0, 142.2, 133.4, 130.8, 129.0, 128.4, 127.5, 124.7, 122.8, 118.0, 108.7, 89.1, 61.9, 42.9, 29.0, 15.9; ESI HRMS: calcd. For  $\text{C}_{24}\text{H}_{21}\text{NO}_4\text{Na}^+$  410.1368, found 410.1370.

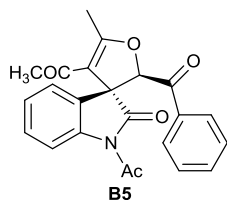

**B5** was obtained according to the similar procedure. White solid, 11% yield (6.4 mg). The diastereomeric ratio was determined to be 10:1 by crude  $^1\text{H}$ -NMR analysis. m.p. 159–160 °C;  $^1\text{H}$  NMR (600 MHz,  $\text{CDCl}_3$ )  $\delta$  (ppm) 7.72 (d,  $J = 7.8$  Hz, 1H), 7.43 (t,  $J = 4.2$  Hz, 1H), 7.19 (d,  $J = 4.8$  Hz, 4H), 7.10 (td,  $J = 7.8, 1.2$  Hz, 1H), 7.04 (td,  $J = 7.8, 1.2$  Hz, 1H), 6.93 (dd,  $J = 7.2, 1.2$  Hz, 1H), 6.27 (s, 1H), 2.64 (s, 3H), 2.57 (s, 3H), 2.22 (s, 3H);  $^{13}\text{C}$  NMR (150 MHz,  $\text{CDCl}_3$ )  $\delta$  (ppm) 192.7, 178.6, 170.1, 169.4, 139.3, 134.9, 134.0, 129.5, 128.5, 127.1, 125.1, 124.0, 120.4, 116.0, 89.8, 62.7, 29.8, 28.8, 26.6, 15.7; ESI HRMS: calcd. For  $\text{C}_{23}\text{H}_{19}\text{NO}_5\text{Na}^+$  412.1162, found 412.1160.

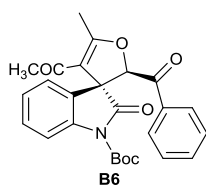

**B6** was obtained according to the similar procedure White solid, 21% yield (14.1 mg). The diastereomeric ratio was determined to be 12:1 by crude  $^1\text{H}$ -NMR analysis. m.p. 161–162 °C;  $^1\text{H}$  NMR (400 MHz,  $\text{CDCl}_3$ )  $\delta$  (ppm) 7.90 (d,  $J = 7.6$  Hz, 2H), 7.85 (d,  $J = 8.4$  Hz, 1H), 7.57 (t,  $J = 7.6$  Hz, 1H), 7.44 (t,  $J = 7.6$  Hz, 2H), 7.30 (dt,  $J = 7.2, 1.6$  Hz, 1H), 7.09 – 7.02 (m, 2H), 4.28 (s, 1H), 2.36 (s, 3H), 2.27 (s, 3H), 1.65 (s, 9H);  $^{13}\text{C}$  NMR (150 MHz,  $\text{CDCl}_3$ )  $\delta$  (ppm) 197.6, 195.8, 191.6, 170.9, 148.4, 140.4, 136.3, 134.2, 128.8, 128.5, 125.9, 124.0, 119.7, 114.5, 85.2, 62.9, 44.4, 43.0, 29.8, 28.3, 28.0; ESI HRMS: calcd. For  $\text{C}_{24}\text{H}_{25}\text{NO}_6\text{Na}^+$  470.1580, found 470.1581.

### 3. General procedure for the synthesis of spirooxindole compounds **6**

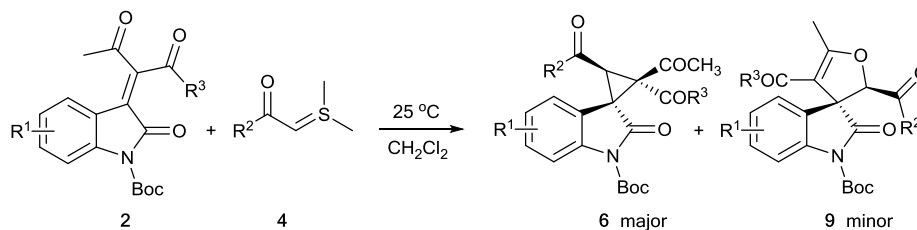

To a solution of Boc-protected tetra-substituted oxindole olefines **2** (0.15 mmol) in CH<sub>2</sub>Cl<sub>2</sub> (2.0 mL) was added sulfur ylides **4** (0.165 mmol) at 25 °C. The reaction mixture was stirred until the reaction completed (monitored by TLC). Then the reaction mixture was concentrated and the residue was purified by flash chromatography on silica gel (petroleum ether/ethyl acetate = 10:1 to 8:1) to give the compounds **6** which were dried under vacuum and further analyzed by <sup>1</sup>H-NMR, <sup>13</sup>C-HMR, HRMS, *etc.*

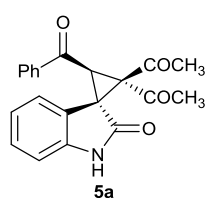

**5a** was obtained according to the similar procedure. white solid, 45% yield (23.4 mg). The diastereomeric ratio was determined to be 18:1 by crude <sup>1</sup>H-NMR analysis. m.p. 165–166 °C; <sup>1</sup>H NMR (400 MHz, CDCl<sub>3</sub>) δ (ppm) 8.37 (s, 1H), 7.89 (dd, *J* = 8.0, 0.8 Hz, 2H), 7.58 – 7.52 (m, 1H), 7.48 – 7.39 (m, 2H), 7.22 (td, *J* = 7.6, 1.2 Hz, 1H), 7.03 (d, *J* = 7.2 Hz, 1H), 6.96 (td, *J* = 7.6, 1.2 Hz, 1H), 6.91 (d, *J* = 8.0 Hz, 1H), 4.26 (s, 1H), 2.36 (s, 3H), 2.26 (s, 3H); <sup>13</sup>C NMR (100 MHz, CDCl<sub>3</sub>) δ (ppm) 198.0, 196.1, 192.0, 173.5, 141.2, 136.5, 134.1, 128.9, 128.7, 128.5, 126.7, 122.5, 121.1, 110.1, 62.5, 43.6, 42.9, 29.8, 28.4; ESI HRMS: calcd. For C<sub>21</sub>H<sub>17</sub>NO<sub>4</sub>Na<sup>+</sup> 370.1055, found 370.1056.

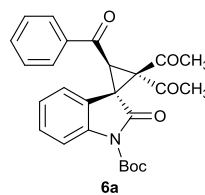

**6a** was obtained as white solid in 82% yield (55.0 mg). The diastereomeric ratio was determined to be 20:1 by crude <sup>1</sup>H-NMR analysis. m.p. 170–171 °C; <sup>1</sup>H NMR (400 MHz, CDCl<sub>3</sub>) δ (ppm) 7.90 (dd, *J* = 8.0, 0.8 Hz, 2H), 7.85 (d, *J* = 8.0 Hz, 1H), 7.59 – 7.55 (m, 1H), 7.43 (t, *J* = 7.6 Hz, 2H), 7.30 – 7.27 (m, 1H), 7.09 – 7.02 (m, 2H), 4.28 (s, 1H), 2.35 (s, 3H), 2.26 (s, 3H), 1.64 (s, 9H); <sup>13</sup>C NMR (100 MHz, CDCl<sub>3</sub>) δ (ppm) 197.7, 195.9, 191.7, 170.9, 148.5, 140.5, 136.4, 134.2, 128.9, 128.6, 126.0, 124.1, 119.8, 114.6, 85.3, 63.0, 44.5, 43.1, 29.8, 28.4, 28.1; ESI HRMS: calcd. For C<sub>26</sub>H<sub>25</sub>NO<sub>6</sub>Na<sup>+</sup> 470.1580, found 470.1581.

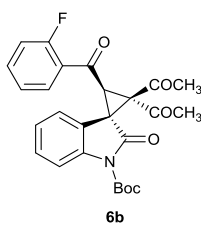

**6b** was obtained as white solid, 74% yield (51.7 mg). The diastereomeric ratio was determined to be 18:1 by crude  $^1\text{H-NMR}$  analysis. m.p. 143–144 °C;  $^1\text{H NMR}$  (600 MHz,  $\text{CDCl}_3$ )  $\delta$  (ppm)  $\delta$  7.88 (d,  $J = 7.8$  Hz, 1H), 7.75 (td,  $J = 7.2, 1.8$  Hz, 1H), 7.54 – 7.49 (m, 1H), 7.32 (dt,  $J = 7.8, 1.2$  Hz, 1H), 7.21 (t,  $J = 7.2$  Hz, 1H), 7.08 – 7.03 (m, 2H), 6.93 (dd,  $J = 7.8, 1.2$  Hz, 1H), 4.17 (d,  $J = 3.0$  Hz, 1H), 2.37 (s, 3H), 2.29 (s, 3H), 1.65 (s, 9H);  $^{13}\text{C NMR}$  (150 MHz,  $\text{CDCl}_3$ )  $\delta$  (ppm) 198.0, 195.9, 190.1 (d,  $J_{\text{CF}} = 3.0$  Hz), 170.9, 161.9 (d,  $J_{\text{CF}} = 255.0$  Hz), 148.7, 140.7, 135.8 (d,  $J_{\text{CF}} = 9.0$  Hz), 130.7 (d,  $J_{\text{CF}} = 1.5$  Hz), 128.9, 125.6, 124.8 (d,  $J_{\text{CF}} = 4.5$  Hz), 124.0, 119.9, 117.0, 116.9, 114.7, 85.2, 63.2, 48.6 (d,  $J_{\text{CF}} = 7.5$  Hz), 43.3 (d,  $J_{\text{CF}} = 3.0$  Hz), 29.9, 28.6, 28.2; ESI HRMS: calcd. For  $\text{C}_{26}\text{H}_{24}\text{FNO}_6\text{Na}^+$  488.1485, found 488.1487.

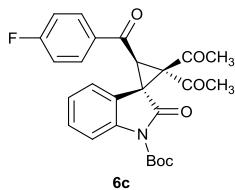

**6c** was obtained as white solid, 70% yield (48.9mg). The diastereomeric ratio was determined to be 20:1 by crude  $^1\text{H-NMR}$  analysis. m.p. 145–146 °C;  $^1\text{H NMR}$  (600 MHz,  $\text{CDCl}_3$ )  $\delta$  (ppm) 7.96 – 7.93 (m, 2H), 7.86 (d,  $J = 8.2$  Hz, 1H), 7.31 (dt,  $J = 9.0, 1.8$  Hz, 1H), 7.12 – 7.09 (m, 2H), 7.07 (td,  $J = 7.8, 1.2$  Hz, 1H), 7.01 (dd,  $J = 7.8, 1.2$  Hz, 1H), 4.22 (s, 1H), 2.35 (s, 3H), 2.26 (s, 3H), 1.65 (s, 9H);  $^{13}\text{C NMR}$  (150 MHz,  $\text{CDCl}_3$ )  $\delta$  (ppm) 197.7, 195.9, 190.1, 171.0, 166.4 (d,  $J_{\text{CF}} = 255.0$  Hz), 148.6, 140.5, 132.9 (d,  $J_{\text{CF}} = 4.5$  Hz), 131.4 (d,  $J_{\text{CF}} = 10.5$  Hz), 129.1, 126.0, 124.2, 119.7, 116.2 (d,  $J_{\text{CF}} = 22.5$  Hz), 114.7, 85.4, 63.1, 44.3, 43.1, 29.9, 28.5, 28.1; ESI HRMS: calcd. For  $\text{C}_{26}\text{H}_{24}\text{FNO}_6\text{Na}^+$  488.1485, found 488.1487.

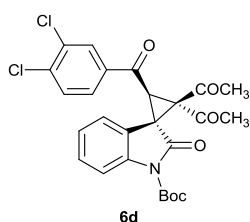

**6d** was obtained as yellow solid, 63% yield (48.8mg). The diastereomeric ratio was determined to be 20:1 by crude  $^1\text{H-NMR}$  analysis. m.p. 144–145 °C;  $^1\text{H NMR}$  (400 MHz,  $\text{CDCl}_3$ )  $\delta$  (ppm) 8.01 (d,  $J = 2.0$  Hz, 1H), 7.88 (d,  $J = 8.0$  Hz, 1H), 7.75 (dd,  $J = 8.4, 2.4$  Hz, 1H), 7.52 (d,  $J = 8.4$  Hz, 1H), 7.33 (td,  $J = 8.8, 1.6$  Hz, 1H), 7.08 (td,  $J = 8.0, 1.2$  Hz, 1H), 6.98 (dd,  $J = 8.0, 1.2$  Hz, 1H), 4.13 (s, 1H), 2.32 (s, 3H), 2.28 (s, 3H), 1.65 (s, 9H);  $^{13}\text{C NMR}$  (100 MHz,  $\text{CDCl}_3$ )  $\delta$  (ppm) 197.5, 195.6, 189.7, 170.7, 148.4, 140.5, 139.0, 135.9, 133.8, 131.0, 130.3, 129.2, 127.5, 125.8, 124.2, 119.4, 114.8, 85.4, 63.3, 43.8, 43.3, 29.8, 28.5, 28.1; ESI HRMS: calcd. For  $\text{C}_{26}\text{H}_{23}\text{Cl}_2\text{NO}_6\text{Na}^+$  538.0800, found 538.0802.

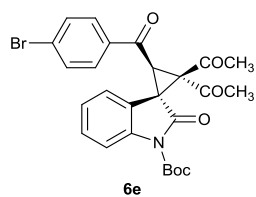

**6e** was obtained as yellow solid, 75% yield (59.2mg). The diastereomeric ratio was determined to be 18:1 by crude <sup>1</sup>H-NMR analysis. m.p. 147–148 °C; <sup>1</sup>H NMR (600 MHz, CDCl<sub>3</sub>) δ (ppm) 7.86 (d, *J* = 8.4 Hz, 1H), 7.77 (d, *J* = 8.4 Hz, 2H), 7.57 (d, *J* = 8.4 Hz, 2H), 7.33 – 7.29 (m, 1H), 7.07 (t, *J* = 7.8 Hz, 1H), 6.99 (d, *J* = 7.2 Hz, 1H), 4.20 (s, 1H), 2.35 (s, 3H), 2.27 (s, 3H), 1.65 (s, 9H); <sup>13</sup>C NMR (150 MHz, CDCl<sub>3</sub>) δ (ppm) 197.7, 195.8, 190.8, 170.9, 148.5, 140.5, 135.2, 132.3, 130.0, 129.1, 125.9, 124.2, 119.6, 114.8, 85.5, 63.1, 44.2, 43.1, 29.9, 28.5, 28.2; ESI HRMS: calcd. For C<sub>26</sub>H<sub>24</sub>BrNO<sub>6</sub>Na<sup>+</sup> 548.0685, found 548.0686.

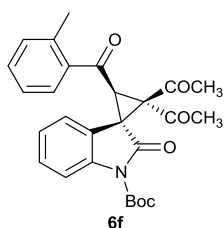

**6f** was obtained as white solid, 80% yield (55.4mg). The diastereomeric ratio was determined to be 20:1 by crude <sup>1</sup>H-NMR analysis. m.p. 142–143 °C; <sup>1</sup>H NMR (600 MHz, CDCl<sub>3</sub>) δ (ppm) 7.88 (d, *J* = 7.8 Hz, 1H), 7.56 (d, *J* = 7.2 Hz, 1H), 7.38 (td, *J* = 7.8, 1.2 Hz, 1H), 7.34 – 7.31 (m, 1H), 7.22 (dd, *J* = 15.6, 9.0 Hz, 2H), 7.09 (dd, *J* = 6.0, 2.4 Hz, 2H), 4.12 (s, 1H), 2.42 (s, 3H), 2.36 (s, 3H), 2.25 (s, 3H), 1.64 (s, 9H); <sup>13</sup>C NMR (150 MHz, CDCl<sub>3</sub>) δ (ppm) 195.9, 194.7, 170.9, 148.5, 140.5, 132.6, 132.1, 129.5, 128.9, 126.2, 126.1, 124.0, 119.8, 114.6, 85.3, 63.2, 47.3, 43.5, 29.8, 28.4, 28.1, 21.2; ESI HRMS: calcd. For C<sub>27</sub>H<sub>27</sub>NO<sub>6</sub>Na<sup>+</sup> 484.1736, found 484.1734.

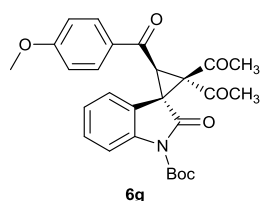

**6g** was obtained as white solid, 81% yield (58.0mg). The diastereomeric ratio was determined to be 20:1 by crude <sup>1</sup>H-NMR analysis. m.p. 145–146 °C; <sup>1</sup>H NMR (400 MHz, CDCl<sub>3</sub>) δ (ppm) 7.88 (d, *J* = 8.8 Hz, 2H), 7.84 (d, *J* = 8.4 Hz, 1H), 7.30 – 7.26 (m, 1H), 7.06 – 7.04 (m, 2H), 6.88 (d, *J* = 8.8 Hz, 2H), 4.25 (s, 1H), 3.83 (s, 3H), 2.36 (s, 3H), 2.25 (s, 3H), 1.64 (s, 9H); <sup>13</sup>C NMR (100 MHz, CDCl<sub>3</sub>) δ (ppm) 197.9, 196.0, 189.7, 171.1, 164.5, 148.6, 140.4, 131.1, 129.5, 128.7, 126.1, 124.0, 120.0, 114.5, 114.1, 85.2, 62.8, 55.6, 44.6, 42.8, 29.9, 28.3, 28.1; ESI HRMS: calcd. For C<sub>27</sub>H<sub>27</sub>NO<sub>7</sub>H<sup>+</sup> 500.1685, found 500.1688.

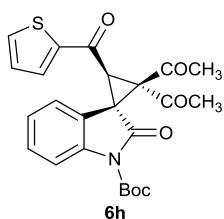

**6h** was obtained as white solid, 68% yield (46.3mg). The diastereomeric ratio was determined to be 20:1 by crude <sup>1</sup>H-NMR analysis. m.p. 137–138 °C; <sup>1</sup>H NMR (600 MHz, CDCl<sub>3</sub>) δ (ppm) 7.86 (d, *J* = 7.8 Hz, 1H), 7.81 (d, *J* = 3.0 Hz, 1H), 7.69 (d, *J* = 4.8 Hz, 1H), 7.34 – 7.31 (m, 1H), 7.14 – 7.10 (m, 3H), 4.15 (s, 1H), 2.35 (s, 3H), 2.25 (s, 3H), 1.64 (s, 9H); <sup>13</sup>C NMR (150 MHz, CDCl<sub>3</sub>) δ (ppm) 197.5, 195.6, 183.9,



170.9, 148.6, 143.7, 140.6, 135.9, 134.1, 129.0, 128.9, 126.5, 124.2, 119.8, 114.7, 85.4, 62.9, 60.5, 45.0, 43.2, 29.8, 28.1; ESI HRMS: calcd. For  $C_{24}H_{23}NO_6SNa^+$  476.1144, found 476.1145.

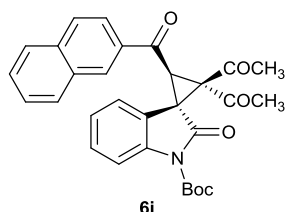

**6i** was obtained as white solid, 65% yield (48.5 mg). The diastereomeric ratio was determined to be 10:1 by crude  $^1H$ -NMR analysis. m.p. 153–154 °C;  $^1H$  NMR (400 MHz,  $CDCl_3$ )  $\delta$  (ppm) 8.47 (s, 1H), 7.97 – 7.92 (m, 2H), 7.85 – 7.82 (m, 3H), 7.60 – 7.55 (m, 2H), 7.30 – 7.26 (m, 1H), 7.13 – 7.05 (m, 2H), 4.46 (s, 1H), 2.38 (s, 3H), 2.30 (s, 3H), 1.65 (s, 9H);  $^{13}C$  NMR (100 MHz,  $CDCl_3$ )  $\delta$  (ppm) 197.8, 195.9, 191.4, 171.1, 148.5, 140.5, 135.9, 133.8, 132.3, 130.9, 129.9, 129.3, 128.9, 128.8, 127.8, 127.2, 126.2, 124.1, 123.5, 119.8, 114.6, 85.3, 63.1, 44.6, 43.3, 29.9, 28.4, 28.1; ESI HRMS: calcd. For  $C_{30}H_{27}NO_6Na^+$  520.1736, found 520.1738.

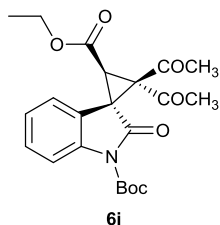

**6j** was obtained as white solid, 79% yield (49.2mg). The diastereomeric ratio was determined to be 20:1 by crude  $^1H$ -NMR analysis. m.p. 149–150 °C;  $^1H$  NMR (600 MHz,  $CDCl_3$ )  $\delta$  (ppm) 7.91 (d,  $J$  = 8.4 Hz, 1H), 7.36 (dt,  $J$  = 8.4, 2.4 Hz, 1H), 7.14 – 7.12 (m, 2H), 4.21 – 4.18 (m, 1H), 4.14 – 4.11 (m, 1H), 3.33 (s, 1H), 2.30 (s, 3H), 2.27 (s, 3H), 1.63 (s, 9H), 1.22 (t,  $J$  = 7.2 Hz, 3H);  $^{13}C$  NMR (150 MHz,  $CDCl_3$ )  $\delta$  (ppm) 197.4, 195.5, 170.6, 166.0, 148.6, 140.8, 129.1, 125.9, 124.0, 119.9, 114.8, 85.3, 62.2, 62.1, 41.6, 40.5, 29.6, 28.6, 28.1, 14.13; ESI HRMS: calcd. For  $C_{22}H_{25}NO_7Na^+$  438.1529, found 438.1531.

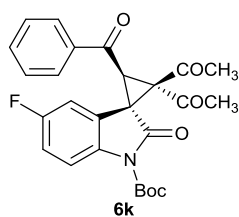

**6k** was obtained as white solid, 68% yield (47.5mg). The diastereomeric ratio was determined to be 13:1 by crude  $^1H$ -NMR analysis. m.p. 172–173 °C;  $^1H$  NMR (600 MHz,  $CDCl_3$ )  $\delta$  (ppm) 7.92 (dd,  $J$  = 8.4, 1.2 Hz, 2H), 7.84 (dd,  $J$  = 9.0, 4.8 Hz, 1H), 7.61 – 7.58 (m, 1H), 7.46 (dd,  $J$  = 7.8, 1.8 Hz, 2H), 7.00 (td,  $J$  = 9.0, 3.0 Hz, 1H), 6.82 (dd,  $J$  = 9.6, 3.0 Hz, 1H), 4.30 (s, 1H), 2.35 (s, 3H), 2.26 (s, 3H), 1.64 (s, 9H);  $^{13}C$  NMR (150 MHz,  $CDCl_3$ )  $\delta$  (ppm) 197.4, 195.8, 191.5, 170.7, 159.3 (d,  $J_{CF}$  = 240 Hz), 148.5, 136.4 (d,  $J_{CF}$  = 36 Hz), 134.5, 129.1, 128.7, 121.7 (d,  $J_{CF}$  = 10.5 Hz), 115.7 (d,  $J_{CF}$  = 9.0 Hz), 115.6, 114.1, 113.9, 85.6, 63.2, 44.7, 43.0, 29.8, 28.4, 28.1; ESI HRMS: calcd. For  $C_{26}H_{24}FNO_6Na^+$  488.1485, found 488.1483.

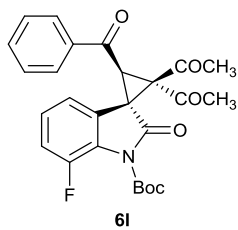

**6l** was obtained as white solid, 70% yield (48.9mg). The diastereomeric ratio was determined to be 20:1 by crude  $^1\text{H-NMR}$  analysis. m.p. 157–158 °C;  $^1\text{H NMR}$  (600 MHz,  $\text{CDCl}_3$ )  $\delta$ (ppm) 7.90 (d,  $J = 7.2$  Hz, 2H), 7.60 – 7.58 (m, 1H), 7.45 (t,  $J = 7.8$  Hz, 2H), 7.07 – 7.01 (m, 2H), 6.84 (dd,  $J = 7.8$ , 1.2 Hz, 1H), 4.30 (s, 1H), 2.35 (s, 3H), 2.27 (s, 3H), 1.61 (s, 9H);  $^{13}\text{C NMR}$  (150 MHz,  $\text{CDCl}_3$ )  $\delta$ (ppm) 197.2, 195.8, 191.5, 170.4, 148.4 (d,  $J_{\text{CF}} = 247.5$  Hz), 147.0, 136.3, 134.5, 129.1, 128.7, 127.6 (d,  $J_{\text{CF}} = 10.5$  Hz), 124.9 (d,  $J_{\text{CF}} = 7.5$  Hz), 122.9 (d,  $J_{\text{CF}} = 3.0$  Hz), 122.1 (d,  $J_{\text{CF}} = 3.0$  Hz), 117.1 (d,  $J_{\text{CF}} = 21.0$  Hz), 86.0, 63.2, 44.5, 43.0, 29.9, 28.4, 27.7; ESI HRMS: calcd. For  $\text{C}_{26}\text{H}_{24}\text{FNO}_6\text{Na}^+$  488.1485, found 488.1483.

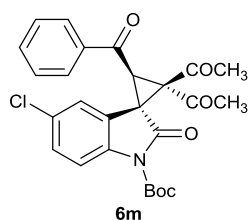

**6m** was obtained as yellow solid, 72% yield (41.9mg). The diastereomeric ratio was determined to be 20:1 by crude  $^1\text{H-NMR}$  analysis. m.p. 136–137 °C;  $^1\text{H NMR}$  (400 MHz,  $\text{CDCl}_3$ )  $\delta$  (ppm) 7.93 (d,  $J = 7.6$  Hz, 2H), 7.82 (d,  $J = 8.8$  Hz, 1H), 7.60 (t,  $J = 7.2$  Hz, 1H), 7.46 (t,  $J = 7.6$  Hz, 2H), 7.29 (d,  $J = 1.2$  Hz, 1H), 7.05 (s, 1H), 4.29 (s, 1H), 2.34 (s, 3H), 2.26 (s, 3H), 1.64 (s, 9H);  $^{13}\text{C NMR}$  (150 MHz,  $\text{CDCl}_3$ )  $\delta$  (ppm) 197.2, 195.2, 191.3, 170.3, 148.3, 138.9, 136.2, 134.4, 129.7, 128.9, 128.8, 128.6, 126.2, 121.5, 115.6, 85.6, 63.1, 44.6, 42.7, 29.6, 28.3, 28.0; ESI HRMS: calcd. For  $\text{C}_{26}\text{H}_{24}\text{ClNO}_6\text{Na}^+$  504.1190, found 504.1189.

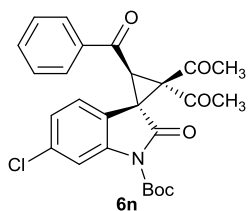

**6n** was obtained as yellow solid, 79% yield (57.1mg). The diastereomeric ratio was determined to be 20:1 by crude  $^1\text{H-NMR}$  analysis. m.p. 145–146 °C;  $^1\text{H NMR}$  (400 MHz,  $\text{CDCl}_3$ )  $\delta$  (ppm) 7.93 (d,  $J = 2.0$  Hz, 1H), 7.90 (d,  $J = 7.6$  Hz, 2H), 7.59 (t,  $J = 7.6$  Hz, 1H), 7.45 (t,  $J = 8.0$  Hz, 2H), 7.05 (dd,  $J = 8.4$ , 1.6 Hz, 1H), 6.96 (d,  $J = 8.8$  Hz, 1H), 4.28 (s, 1H), 2.34 (s, 3H), 2.25 (s, 3H), 1.64 (s, 9H);  $^{13}\text{C NMR}$  (100 MHz,  $\text{CDCl}_3$ )  $\delta$  (ppm) 197.3, 195.8, 191.6, 170.5, 148.3, 141.3, 136.3, 135.0, 134.4, 129.0, 128.6, 127.0, 124.2, 118.2, 115.4, 85.8, 62.9, 44.6, 42.8, 29.8, 28.3, 28.0; ESI HRMS: calcd. For  $\text{C}_{26}\text{H}_{24}\text{ClNO}_6\text{Na}^+$  504.1190, found 504.1191.

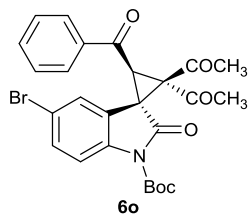

**6o** was obtained as yellow solid, 80% yield (63.2mg). The diastereomeric ratio was determined to be 15:1 by crude <sup>1</sup>H-NMR analysis. m.p. 142–143 °C; <sup>1</sup>H NMR (600 MHz, CDCl<sub>3</sub>) δ (ppm) 7.93 (d, *J* = 7.2 Hz, 2H), 7.76 (d, *J* = 9.0 Hz, 1H), 7.60 (t, *J* = 7.8 Hz, 1H), 7.446 (t, *J* = 7.8 Hz, 2H), 7.43 (dd, *J* = 9.0, 1.8 Hz, 1H), 7.19 (d, *J* = 1.8 Hz, 1H), 4.28 (s, 1H), 2.34 (s, 3H), 2.26 (s, 3H), 1.63 (s, 9H); <sup>13</sup>C NMR (150 MHz, CDCl<sub>3</sub>) δ (ppm) 197.2, 195.5, 191.3, 170.1, 148.2, 139.4, 136.2, 134.4, 131.8, 129.0, 128.9, 128.6, 121.8, 117.3, 115.9, 85.6, 63.2, 44.6, 42.6, 29.6, 28.3, 27.9; ESI HRMS: calcd. For C<sub>26</sub>H<sub>24</sub>BrNO<sub>6</sub>Na<sup>+</sup> 548.0685, found 548.0687.

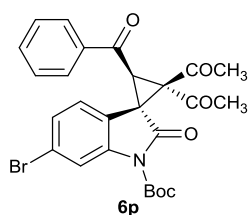

**6p** was obtained as yellow solid, 81% yield (63.9mg). The diastereomeric ratio was determined to be 9:1 by crude <sup>1</sup>H-NMR analysis. m.p. 149–150 °C; <sup>1</sup>H NMR (400 MHz, CDCl<sub>3</sub>) δ (ppm) 8.09 (d, *J* = 0.8 Hz, 1H), 7.90 (d, *J* = 4.8 Hz, 2H), 7.61 – 7.58 (m, 1H), 7.45 (t, *J* = 5.2 Hz, 2H), 7.20 (dd, *J* = 5.6, 0.8 Hz, 1H), 6.90 (d, *J* = 5.6 Hz, 1H), 4.29 (s, 1H), 2.34 (s, 3H), 2.25 (s, 3H), 1.64 (s, 9H); <sup>13</sup>C NMR (100 MHz, CDCl<sub>3</sub>) δ (ppm) 197.3, 195.9, 191.6, 170.5, 148.3, 141.4, 136.3, 134.5, 129.1, 128.7, 127.3, 127.2, 123.1, 118.8, 118.3, 85.9, 63.0, 44.6, 29.9, 28.4, 28.1, 28.0; ESI HRMS: calcd. For C<sub>26</sub>H<sub>24</sub>BrNO<sub>6</sub>Na<sup>+</sup> 548.0685, found 548.0683.

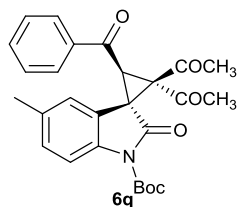

**6q** was obtained as white solid, 85% yield (58.8mg). The diastereomeric ratio was determined to be 15:1 by crude <sup>1</sup>H-NMR analysis. m.p. 168–169 °C; <sup>1</sup>H NMR (400 MHz, CDCl<sub>3</sub>) δ (ppm) 7.90 (d, *J* = 7.2 Hz, 2H), 7.72 (d, *J* = 8.4 Hz, 1H), 7.59 – 7.55 (m, 1H), 7.44 (t, *J* = 8.0 Hz, 2H), 7.10 (dd, *J* = 8.4, 0.8 Hz, 1H), 6.84 (s, 1H), 4.25 (s, 1H), 2.35 (s, 3H), 2.29 (s, 3H), 2.26 (s, 3H), 1.64 (s, 9H); <sup>13</sup>C NMR (100 MHz, CDCl<sub>3</sub>) δ (ppm) 197.8, 195.9, 191.7, 171.1, 148.6, 138.2, 136.5, 134.2, 133.7, 129.5, 128.9, 128.6, 126.5, 119.7, 114.4, 85.1, 63.0, 44.5, 43.2, 29.8, 28.4, 28.1, 21.0; ESI HRMS: calcd. For C<sub>27</sub>H<sub>27</sub>NO<sub>6</sub>Na<sup>+</sup> 484.1736, found 484.1740.

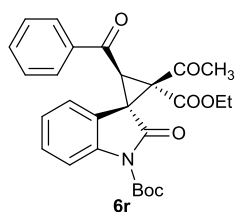

**6r** was obtained as white solid, 90% yield (64.5mg). The diastereomeric ratio was determined to be 18:1 by crude <sup>1</sup>H-NMR analysis. m.p. 147–148 °C; <sup>1</sup>H NMR (600 MHz, CDCl<sub>3</sub>) δ (ppm) 8.10 (dd, *J* = 8.4, 1.2 Hz, 2H), 7.90 (d, *J* = 7.8 Hz, 1H), 7.59 – 7.56 (m, 1H), 7.47 (dt, *J* = 7.2, 1.2 Hz, 2H), 7.34 – 7.31 (m, 1H), 7.08 (dt, *J* = 7.8, 1.8 Hz, 1H), 7.01 (dd, *J* = 7.8, 1.2 Hz, 1H), 4.43 – 4.39 (m, 1H),

4.32 – 4.29 (m, 1H), 4.10 (s, 1H), 2.29 (s, 3H), 1.65 (s, 9H), 1.35 (t,  $J = 7.2$  Hz, 3H);  $^{13}\text{C}$  NMR (150 MHz,  $\text{CDCl}_3$ )  $\delta$  (ppm) 195.3, 191.0, 170.8, 165.5, 148.7, 140.7, 136.6, 133.9, 129.1, 128.9, 128.5, 125.7, 124.1, 119.7, 114.8, 85.0, 63.2, 56.7, 42.1, 42.0, 29.7, 28.2, 14.1; ESI HRMS: calcd. For  $\text{C}_{27}\text{H}_{27}\text{NO}_7\text{Na}^+$  500.1685, found 500.1687.

#### 4. General procedure for the synthesis of spirooxindole compounds **10**

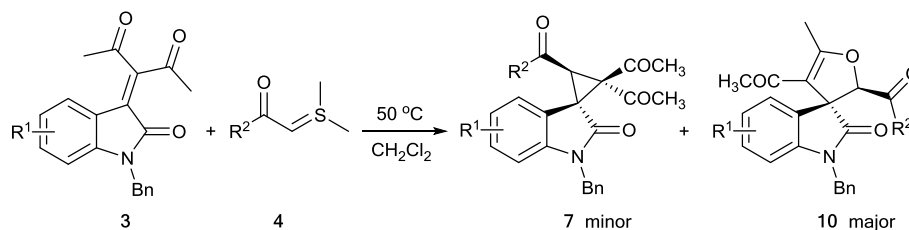

To a solution of Bn-protected tetra-substituted oxindole olefines **3** (0.15 mmol) in  $\text{CH}_2\text{Cl}_2$  (2.0 mL) was added sulfur ylides **4** (0.165 mmol) at  $50\text{ }^\circ\text{C}$ . The reaction mixture was stirred until the reaction completed (monitored by TLC). Then the reaction mixture was concentrated and the residue was purified by flash chromatography on silica gel (petroleum ether/ethyl acetate = 3:1) to give the compounds **10** which were dried under vacuum and further analyzed by  $^1\text{H}$ -NMR,  $^{13}\text{C}$ -HMR, HRMS, *etc.*

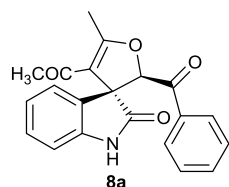

**8a** was obtained according to the similar procedure. white solid, 48% yield (25.0 mg). The diastereomeric ratio was determined to be 10:1 by crude  $^1\text{H}$ -NMR analysis. m.p.  $164\text{--}165\text{ }^\circ\text{C}$ ;  $^1\text{H}$  NMR (400 MHz,  $\text{CDCl}_3$ )  $\delta$  (ppm) 7.84 (s, 1H), 7.43 – 7.38 (m, 1H), 7.35 (dd,  $J = 8.4, 1.2$  Hz, 2H), 7.22 (td,  $J = 7.6, 1.6$  Hz, 2H), 6.99 – 6.95 (m, 1H), 6.91 – 6.86 (m, 2H), 6.40 (d,  $J = 7.6$  Hz, 1H), 6.27 (s, 1H), 2.55 (s, 3H), 2.15 (s, 3H);  $^{13}\text{C}$  NMR (100 MHz,  $\text{CDCl}_3$ )  $\delta$  (ppm) 192.8, 191.3, 178.8, 170.2, 139.9, 134.8, 133.6, 129.0, 128.4, 127.5, 127.4, 124.9, 122.8, 118.3, 109.3, 88.8, 62.2, 28.9, 15.8; ESI HRMS: calcd. For  $\text{C}_{21}\text{H}_{17}\text{NO}_4\text{Na}^+$  370.1055, found 370.1054.

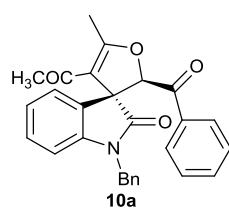

**10a** was obtained as white solid in 74% yield (48.6 mg). The diastereomeric ratio was determined to be 10:1 by crude  $^1\text{H}$ -NMR analysis. m.p.  $168\text{--}169\text{ }^\circ\text{C}$ ;  $^1\text{H}$  NMR (400 MHz,  $\text{CDCl}_3$ )  $\delta$  (ppm) 7.42 (t,  $J = 7.2$  Hz, 1H), 7.30 (d,  $J = 4.4$  Hz, 4H), 7.25 (d,  $J = 4.8$  Hz, 3H), 7.16 (t,  $J = 7.6$  Hz, 2H), 6.93 – 6.89 (m, 2H), 6.86 (t,  $J = 7.2$  Hz, 1H), 6.30 (s, 1H), 6.17 (d,  $J = 7.6$  Hz, 1H), 5.08 (d,  $J = 15.6$  Hz, 1H),

4.20 (d,  $J = 16.0$  Hz, 1H), 2.56 (s, 3H), 2.15 (s, 3H);  $^{13}\text{C}$  NMR (100 MHz,  $\text{CDCl}_3$ )  $\delta$  (ppm) 192.9, 191.0, 177.3, 169.9, 142.2, 135.3, 135.0, 133.4, 128.9, 128.7, 128.3, 127.5, 127.3, 126.9, 124.7, 122.8, 118.4, 108.8, 89.0, 62.0, 44.6, 29.0, 15.9; ESI HRMS: calcd. For  $\text{C}_{28}\text{H}_{23}\text{NO}_4\text{Na}^+$  460.1525, found 460.1526.

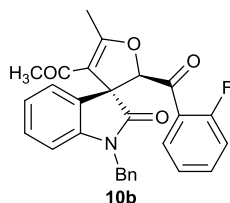

**10b** was obtained as white solid, 66% yield (45.1 mg). The diastereomeric ratio was determined to be 16:1 by crude  $^1\text{H}$ -NMR analysis. m.p. 154–155  $^\circ\text{C}$ ;  $^1\text{H}$  NMR (600 MHz,  $\text{CDCl}_3$ )  $\delta$  (ppm) 7.35 – 7.31 (m, 4H), 7.31 – 7.24 (m, 3H), 6.95 (tt,  $J = 7.2, 1.8$  Hz, 2H), 6.90 (t,  $J = 6.6$  Hz, 2H), 6.86 (t,  $J = 7.8$  Hz, 1H), 6.83 – 6.79 (m, 1H), 6.26 (s, 1H), 5.02 (d,  $J = 15.6$  Hz, 1H), 4.33 (d,  $J = 15.6$  Hz, 1H), 2.55 (s, 3H), 2.13 (s, 3H);  $^{13}\text{C}$  NMR (150 MHz,  $\text{CDCl}_3$ )  $\delta$  (ppm) 191.3 (d,  $J_{\text{CF}} = 4.5$  Hz), 191.0, 177.1, 169.9, 160.4 (d,  $J_{\text{CF}} = 253.5$  Hz), 142.8, 135.5, 134.7 (d,  $J_{\text{CF}} = 9.0$  Hz), 130.3 (d,  $J_{\text{CF}} = 3.0$  Hz), 129.0, 128.8, 127.6, 127.5, 127.1, 124.6, 124.3 (d,  $J_{\text{CF}} = 3.0$  Hz), 122.8, 115.9, 115.8, 108.9, 90.9 (d,  $J_{\text{CF}} = 4.5$  Hz), 61.6, 44.6, 29.1, 15.9; ESI HRMS: calcd. For  $\text{C}_{28}\text{H}_{22}\text{FNO}_4\text{Na}^+$  478.1431, found 478.1430.

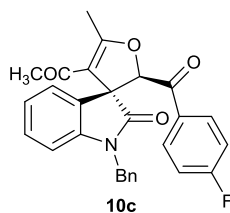

**10c** was obtained as white solid, 68% yield (46.5mg). The diastereomeric ratio was determined to be 16:1 by crude  $^1\text{H}$ -NMR analysis. m.p. 151–152  $^\circ\text{C}$ ;  $^1\text{H}$  NMR (600 MHz,  $\text{CDCl}_3$ )  $\delta$  (ppm) 7.33 - 7.32 (m, 4H), 7.31 – 7.28 (m, 3H), 6.94 (td,  $J = 7.8, 1.2$  Hz, 1H), 6.91 (dd,  $J = 7.2, 1.2$  Hz, 1H), 6.86 (td,  $J = 7.2, 0.6$  Hz, 1H), 6.81 – 6.76 (m, 2H), 6.28 (d,  $J = 7.8$  Hz, 1H), 6.25 (s, 1H), 5.04 (d,  $J = 15.6$  Hz, 1H), 4.38 (d,  $J = 15.6$  Hz, 1H), 2.56 (s, 3H), 2.16 (s, 3H);  $^{13}\text{C}$  NMR (150 MHz,  $\text{CDCl}_3$ )  $\delta$  (ppm) 191.4, 191.0, 177.3, 169.9, 165.8 (d,  $J_{\text{CF}} = 255.0$  Hz), 142.3, 135.3, 131.4 (d,  $J_{\text{CF}} = 3.0$  Hz), 130.2 (d,  $J_{\text{CF}} = 9.0$  Hz), 129.1, 128.9, 127.7, 127.5, 126.9, 124.8, 122.9, 118.6, 115.6 (d,  $J_{\text{CF}} = 22.5$  Hz), 108.9, 88.7, 62.1, 44.7, 29.1, 15.9; ESI HRMS: calcd. For  $\text{C}_{28}\text{H}_{22}\text{FNO}_4\text{Na}^+$  478.1431, found 478.1429.

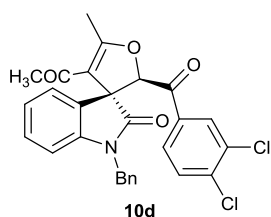

**10d** was obtained as yellow solid, 71% yield (53.9 mg). The diastereomeric ratio was determined to be 8:1 by crude  $^1\text{H}$ -NMR analysis. m.p. 196–197  $^\circ\text{C}$ ;  $^1\text{H}$  NMR (600 MHz,  $\text{CDCl}_3$ )  $\delta$  (ppm) 7.37 – 7.34 (m, 3H), 7.33 (d,  $J = 1.8$  Hz, 2H), 7.28 (dt,  $J = 6.0, 1.2$  Hz, 1H), 7.12 (d,  $J = 8.4$  Hz, 1H), 7.08 (dd,  $J = 8.4, 1.8$  Hz, 1H), 6.98 (dt,  $J = 9.0, 4.8$  Hz, 1H), 6.88 (d,  $J = 4.2$  Hz, 2H),

6.31 (d,  $J = 7.8$  Hz, 1H), 6.18 (s, 1H), 5.12 (d,  $J = 15.6$  Hz, 1H), 4.36 (d,  $J = 15.6$  Hz, 1H), 2.55 (s, 3H), 2.16 (s, 3H);  $^{13}\text{C}$  NMR (150 MHz,  $\text{CDCl}_3$ )  $\delta$  (ppm) 191.0, 190.9, 177.1, 169.7, 142.3, 138.2, 135.2, 134.4, 133.3, 130.4, 129.5, 129.3, 128.9, 127.8, 127.5, 126.7, 126.3, 124.7, 123.0, 118.5, 109.0, 88.8, 62.0, 44.8, 29.1, 15.9; ESI HRMS: calcd. For  $\text{C}_{28}\text{H}_{21}\text{Cl}_2\text{NO}_4\text{Na}^+$  528.0745, found 528.0748.

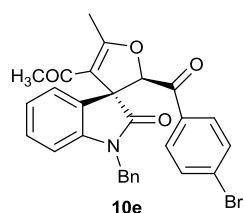

**10e** was obtained as white solid, 75% yield (58.1mg). The diastereomeric ratio was determined to be 10:1 by crude  $^1\text{H}$ -NMR analysis. m.p. 152–153 °C;  $^1\text{H}$  NMR (400 MHz,  $\text{CDCl}_3$ )  $\delta$  (ppm) 7.35 – 7.31 (m, 4H), 7.25 (t,  $J = 4.0$  Hz, 3H), 7.12 (d,  $J = 8.4$  Hz, 2H), 6.96 (td,  $J = 7.6, 2.0$  Hz, 1H), 6.90 (dd,  $J = 7.2, 1.6$  Hz, 1H), 6.86 (t,  $J = 7.6$  Hz, 1H), 6.30 (d,  $J = 8.0$  Hz, 1H), 6.23 (s, 1H), 5.00 (d,  $J = 15.6$  Hz, 1H), 4.41 (d,  $J = 15.6$  Hz, 1H), 2.55 (s, 3H), 2.15 (s, 3H);  $^{13}\text{C}$  NMR (100 MHz,  $\text{CDCl}_3$ )  $\delta$  (ppm) 191.9, 190.9, 177.2, 169.7, 142.3, 135.2, 133.6, 131.6, 129.1, 128.9, 128.8, 128.7, 127.7, 127.5, 127.4, 126.8, 124.7, 122.8, 118.5, 108.9, 88.7, 61.9, 44.8, 29.0, 15.8; ESI HRMS: calcd. For  $\text{C}_{28}\text{H}_{22}\text{BrNO}_4\text{Na}^+$  538.0630, found 538.0632.

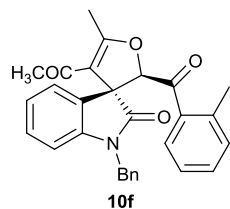

**10f** was obtained as white solid, 78% yield (52.8mg). The diastereomeric ratio was determined to be 20:1 by crude  $^1\text{H}$ -NMR analysis. m.p. 178–179 °C;  $^1\text{H}$  NMR (600 MHz, )  $\delta$ (ppm) 7.31 (td,  $J = 7.8, 1.2$  Hz, 1H), 7.28 – 7.26 (m, 3H), 7.22 (t,  $J = 6.0$  Hz, 3H), 7.12 (t,  $J = 7.2$  Hz, 1H), 7.01 (dd,  $J = 7.2, 1.2$  Hz, 1H), 6.97 (td,  $J = 7.2, 2.4$  Hz, 2H), 6.89 (td,  $J = 7.8, 0.6$  Hz, 1H), 6.30 (s, 1H), 6.20 (d,  $J = 7.8$  Hz, 1H), 4.97 (d,  $J = 16.2$  Hz, 1H), 4.02 (d,  $J = 16.2$  Hz, 1H), 2.56 (s, 3H), 2.13 (s, 3H), 1.81 (s, 3H);  $^{13}\text{C}$  NMR ( 150 MHz,  $\text{CDCl}_3$ )  $\delta$  (ppm) 194.3, 190.9, 176.9, 169.6, 142.3, 140.1, 140.0, 135.2, 133.9, 132.3, 131.7, 129.1, 128.7, 128.5, 127.4, 127.0, 125.1, 124.5, 122.8, 118.9, 109.1, 89.4, 61.8, 44.5, 28.9, 20.0, 15.8; ESI HRMS: calcd. For  $\text{C}_{29}\text{H}_{25}\text{NO}_4\text{Na}^+$  474.1681, found 474.1683.

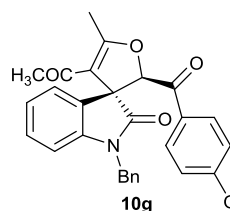

**10g** was obtained as white solid, 81% yield (56.8mg). The diastereomeric ratio was determined to be 18:1 by crude  $^1\text{H}$ -NMR analysis. m.p. 188–189 °C;  $^1\text{H}$  NMR (600 MHz,  $\text{CDCl}_3$ )  $\delta$  (ppm) 7.33 (t,  $J = 3.0$  Hz, 1H), 7.31 (t,  $J = 1.8$  Hz, 1H), 7.29 – 7.28 (m, 4H), 7.26 – 7.24 (m, 1H), 6.94 (d,  $J = 7.2$  Hz, 1H), 6.92 (dd,  $J = 7.2, 1.2$  Hz, 1H), 6.85 (td,  $J = 7.2, 0.6$  Hz, 1H), 6.63 (dt,  $J = 9.6, 3.0$  Hz, 2H), 6.26 (d,  $J = 7.2$  Hz, 2H), 5.03 (d,  $J = 15.6$  Hz, 1H), 4.46 (d,  $J = 16.2$  Hz, 1H), 3.78 (s, 3H),

2.55 (s, 3H), 2.15 (s, 3H);  $^{13}\text{C}$  NMR (150 MHz,  $\text{CDCl}_3$ )  $\delta$  (ppm) 191.1, 191.0, 177.5, 170.1, 163.9, 142.3, 135.5, 130.0, 128.9, 128.8, 128.0, 127.5, 127.4, 127.0, 124.9, 122.8, 118.6, 113.7, 108.8, 88.5, 62.2, 55.6, 44.7, 29.1, 16.0; ESI HRMS: calcd. For  $\text{C}_{29}\text{H}_{25}\text{NO}_5\text{Na}^+$  490.1630, found 490.1631.

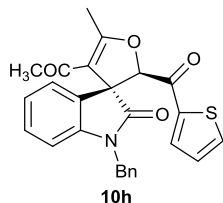

**10h** was obtained as white solid, 60% yield (39.9 mg). The diastereomeric ratio was determined to be 5:1 by crude  $^1\text{H}$ -NMR analysis. m.p. 172–173 °C;  $^1\text{H}$  NMR (600 MHz,  $\text{CDCl}_3$ )  $\delta$  (ppm) 7.51 (dd,  $J = 4.8, 1.2$  Hz, 1H), 7.36 (dd,  $J = 4.2, 1.2$  Hz, 3H), 7.34 – 7.31 (m, 2H), 7.28 (dd,  $J = 6.6, 1.2$  Hz, 1H), 6.98

(td,  $J = 7.8, 1.2$  Hz, 1H), 6.95 (dd,  $J = 7.2, 0.6$  Hz, 1H), 6.88 (dd,  $J = 7.2, 0.6$  Hz, 1H), 6.83 – 6.82 (m, 1H), 6.40 (d,  $J = 7.8$  Hz, 1H), 6.08 (s, 1H), 5.06 (d,  $J = 15.6$  Hz, 1H), 4.64 (d,  $J = 15.6$  Hz, 1H), 2.56 (s, 3H), 2.16 (s, 3H);  $^{13}\text{C}$  NMR (150 MHz,  $\text{CDCl}_3$ )  $\delta$  (ppm) 191.2, 184.9, 177.5, 169.9, 142.4, 140.9, 135.5, 135.4, 132.2, 129.1, 128.9, 128.8, 127.9, 127.7, 127.5, 124.8, 123.0, 118.6, 108.9, 89.2, 62.6, 44.7, 29.1, 15.9; ESI HRMS: calcd. For  $\text{C}_{26}\text{H}_{21}\text{NO}_4\text{SNa}^+$  466.1089, found 466.1090.

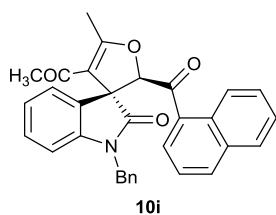

**10i** was obtained as white solid, 62% yield (45.3 mg). The diastereomeric ratio was determined to be 5:1 by crude  $^1\text{H}$ -NMR analysis. m.p. 170–171 °C;  $^1\text{H}$  NMR (400 MHz,  $\text{CDCl}_3$ )  $\delta$ (ppm) 7.90 – 7.86 (m, 2H), 7.80 (d,  $J = 8.0$  Hz, 1H), 7.63 – 7.53 (m, 3H), 7.27 (d,  $J =$

7.2 Hz, 2H), 7.09 – 7.08 (m, 4H), 6.97 (d,  $J = 7.2$  Hz, 1H), 6.87 – 6.83 (m, 2H), 6.48 (s, 1H), 5.95 (d,  $J = 7.2$  Hz, 1H), 5.00 (d,  $J = 16.0$  Hz, 1H), 3.76 (d,  $J = 16.0$  Hz, 1H), 2.59 (s, 3H), 2.16 (s, 3H);  $^{13}\text{C}$  NMR (150 MHz,  $\text{CDCl}_3$ )  $\delta$  (ppm) 192.7, 190.9, 177.3, 169.9, 142.0, 135.4, 134.9, 132.3, 131.8, 129.5, 129.1, 128.9, 128.8, 128.5, 128.3, 127.7, 127.3, 127.0, 126.9, 124.7, 123.0, 122.7, 118.4, 108.8, 89.0, 62.1, 44.4, 29.7, 29.0, 15.9; ESI HRMS: calcd. For  $\text{C}_{32}\text{H}_{25}\text{NO}_4\text{Na}^+$  510.1681, found 510.1682.

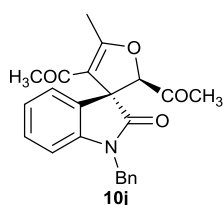

**10j** was obtained as white solid, 74% yield (41.7 mg). The diastereomeric ratio was determined to be 6:1 by crude  $^1\text{H}$ -NMR analysis. m.p. 145–146 °C;  $^1\text{H}$  NMR (600 MHz,  $\text{CDCl}_3$ )  $\delta$  (ppm) 7.48 (d,  $J = 7.2$  Hz, 2H), 7.36 (t,  $J = 7.8$  Hz, 3H), 7.29 (d,  $J = 7.2$  Hz, 1H), 7.15 (dt,  $J = 3.0, 1.2$  Hz, 1H), 6.93 (d,  $J =$

2.4 Hz, 1H), 6.71 (d,  $J = 7.8$  Hz, 1H), 5.38 (s, 1H), 5.10 (d,  $J = 16.2$  Hz, 1H), 4.99 (d,  $J = 15.6$  Hz, 1H), 2.50 (s, 3H), 2.12 (s, 3H), 1.77 (s, 3H);  $^{13}\text{C}$  NMR (150 MHz,  $\text{CDCl}_3$ )  $\delta$  (ppm) 201.4, 191.1, 176.9, 169.3, 142.6, 135.5, 129.4, 128.8, 127.7, 127.4, 123.5, 122.9, 109.6, 91.7, 61.2, 44.7, 28.9,

27.3, 15.7; ESI HRMS: calcd. For  $C_{23}H_{21}NO_4Na^+$  398.1368, found 398.1368.

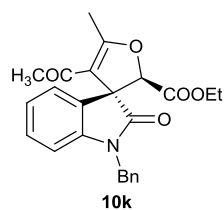

**10k** was obtained as white solid, 76% yield (46.2 mg). The diastereomeric ratio was determined to be 5:1 by crude  $^1H$ -NMR analysis. m.p. 168–169 °C;  $^1H$  NMR (600 MHz,  $CDCl_3$ )  $\delta$  (ppm) 7.44 (d,  $J = 7.8$  Hz, 2H), 7.34 (t,  $J = 7.2$  Hz, 2H), 7.28 (d,  $J = 7.2$  Hz, 1H), 7.14 (td,  $J = 7.8, 1.2$  Hz, 1H), 7.02 (dd,  $J = 7.8, 1.2$  Hz, 1H), 6.93 (td,  $J = 7.8, 0.6$  Hz, 1H), 6.67 (d,  $J = 7.8$  Hz, 1H), 5.43 (s, 1H), 5.17 (d,  $J = 15.6$  Hz, 1H), 4.86 (d,  $J = 15.6$  Hz, 1H), 4.20 (m, 1H), 3.72 (m, 1H), 2.50 (s, 3H), 2.13 (s, 3H), 0.50 (t,  $J = 7.2$  Hz, 3H);  $^{13}C$  NMR (150 MHz,  $CDCl_3$ )  $\delta$  (ppm) 191.2, 176.9, 169.5, 166.1, 143.0, 135.8, 128.3, 128.8, 128.0, 127.7, 123.7, 122.7, 109.2, 85.7, 61.5, 44.6, 34.4, 31.8, 29.0, 15.8, 13.3; ESI HRMS: calcd. For  $C_{24}H_{23}NO_5Na^+$  428.1474, found 428.1476.

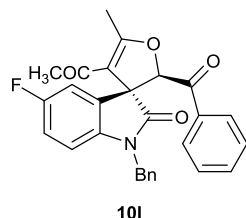

**10l** was obtained as white solid, 70% yield (47.8mg). The diastereomeric ratio was determined to be 10:1 by crude  $^1H$ -NMR analysis. m.p. 158–159 °C;  $^1H$  NMR (600 MHz,  $CDCl_3$ )  $\delta$  (ppm) 7.46 (tt,  $J = 7.8, 1.2$  Hz, 1H), 7.33 (dd,  $J = 8.4, 1.2$  Hz, 2H), 7.31 – 7.28 (m, 4H), 7.20 (td,  $J = 7.8, 1.8$  Hz, 2H), 6.69 (dd,  $J = 7.8, 2.4$  Hz, 1H), 6.60 (td,  $J = 8.4, 2.4$  Hz, 1H), 6.31 (s, 1H), 6.07 (dd,  $J = 8.4, 4.2$  Hz, 1H), 5.30 (s, 1H), 5.10 (d,  $J = 16.2$  Hz, 1H), 4.18 (d,  $J = 16.2$  Hz, 1H), 2.57 (s, 3H), 2.22 (s, 3H);  $^{13}C$  NMR (150 MHz,  $CDCl_3$ )  $\delta$  (ppm) 192.6, 190.9, 177.2, 159.2 (d,  $J_{CF} = 241.5$  Hz), 138.3, 135.0, 134.9, 128.9, 128.5, 127.7, 127.6, 127.2, 118.6, 115.3 (d,  $J_{CF} = 24.0$  Hz), 112.7 (d,  $J_{CF} = 24.0$  Hz), 109.4 (d,  $J_{CF} = 9.0$  Hz), 88.8, 62.4, 44.8, 29.1, 15.9; ESI HRMS: calcd. For  $C_{28}H_{22}FNO_4Na^+$  478.1431, found 478.1429.

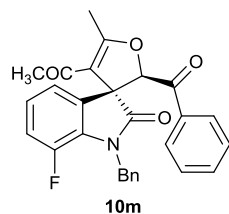

**10m** was obtained as white solid, 56% yield (38.2mg). The diastereomeric ratio was determined to be 16:1 by crude  $^1H$ -NMR analysis. m.p. 160–161 °C;  $^1H$  NMR (600 MHz,  $CDCl_3$ )  $\delta$  (ppm) 7.43 (tt,  $J = 7.8, 1.2$  Hz, 1H), 7.39 (d,  $J = 7.2$  Hz, 2H), 7.32 (td,  $J = 7.2, 1.8$  Hz, 2H), 7.28 – 7.25 (m, 1H), 7.23 (dd,  $J = 8.4, 1.2$  Hz, 2H), 7.12 (t,  $J = 7.2$  Hz, 2H), 6.82 – 6.79 (m, 1H), 6.72 – 6.68 (m, 2H), 6.27 (s, 1H), 5.09 (d,  $J = 15.6$  Hz, 1H), 4.48 (d,  $J = 15.0$  Hz, 1H), 2.56 (s, 3H), 2.16 (s, 3H);  $^{13}C$  NMR (150 MHz,  $CDCl_3$ )  $\delta$  (ppm) 192.7, 191.0, 177.1, 170.1, 146.9 (d,  $J_{CF} = 244.9$  Hz), 136.6, 134.8, 133.8, 128.6, 128.4, 127.6 (d,  $J_{CF} = 2.0$  Hz), 127.4, 123.5, 123.4, 120.7, 120.6, 118.6, 117.2, 117.0, 89.0, 62.2, 46.1, 29.1, 15.9; ESI HRMS: calcd. For  $C_{28}H_{22}FNO_4Na^+$  478.1431, found 478.1432.



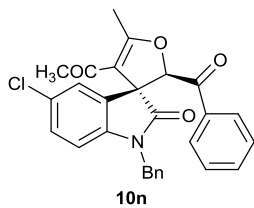

**10n** was obtained as white solid, 66% yield (46.7mg). The diastereomeric ratio was determined to be 5:1 by crude <sup>1</sup>H-NMR analysis. m.p. 159–160 °C; <sup>1</sup>H NMR (600 MHz, CDCl<sub>3</sub>) δ (ppm) 7.46 (t, *J* = 7.8 Hz, 1H), 7.31 (dd, *J* = 7.8, 1.2 Hz, 3H), 7.28 (d, *J* = 5.4 Hz, 3H), 7.24 (dd, *J* = 6.6, 5.4 Hz, 1H), 7.21 (t, *J* = 7.8 Hz, 2H), 6.91 (d, *J* = 1.8 Hz, 1H), 6.87 (dd, *J* = 8.4, 2.4 Hz, 1H), 6.29 (s, 1H), 6.06 (d, *J* = 8.4 Hz, 1H), 5.08 (d, *J* = 16.2 Hz, 1H), 4.18 (d, *J* = 16.2 Hz, 1H), 2.57 (s, 3H), 2.24 (s, 3H); <sup>13</sup>C NMR (150 MHz, CDCl<sub>3</sub>) δ (ppm) 192.7, 191.0, 177.1, 170.1, 147.7, 146.1, 136.6, 134.8, 133.8, 128.6, 128.4, 127.7, 127.6, 127.5, 127.4, 123.5, 123.4, 120.6, 118.6, 117.2, 117.0, 89.0, 62.2, 46.1, 29.0, 15.9; ESI HRMS: calcd. For C<sub>28</sub>H<sub>22</sub>ClNO<sub>4</sub>Na<sup>+</sup> 494.1135, found 494.1133.

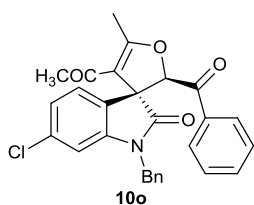

**10o** was obtained as yellow solid, 67% yield (47.4 mg). The diastereomeric ratio was determined to be 15:1 by crude <sup>1</sup>H-NMR analysis. m.p. 164–165 °C; <sup>1</sup>H NMR (600 MHz, CDCl<sub>3</sub>) δ (ppm) 7.47 (tt, *J* = 7.2, 1.2 Hz, 1H), 7.33 – 7.31 (m, 2H), 7.31 – 7.28 (m, 5H), 7.21 (td, *J* = 8.4, 1.8 Hz, 2H), 6.84 (d, *J* = 1.8 Hz, 2H), 6.28 (s, 1H), 6.16 (s, 1H), 5.05 (d, *J* = 15.6 Hz, 1H), 4.18 (d, *J* = 16.2 Hz, 1H), 2.56 (s, 3H), 2.20 (s, 3H); <sup>13</sup>C NMR (100 MHz, CDCl<sub>3</sub>) δ (ppm) 192.7, 190.9, 177.4, 170.0, 143.5, 134.9, 134.7, 133.8, 129.0, 128.5, 128.9, 127.8, 127.5, 125.6, 125.5, 122.7, 118.6, 109.4, 88.8, 61.8, 44.7, 29.1, 15.9; ESI HRMS: calcd. For C<sub>28</sub>H<sub>22</sub>ClNO<sub>4</sub>Na<sup>+</sup> 494.1135, found 494.1136.

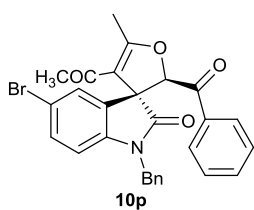

**10p** was obtained as white solid, 70% yield (54.2 mg). The diastereomeric ratio was determined to be 13:1 by crude <sup>1</sup>H-NMR analysis. m.p. 200–201 °C; <sup>1</sup>H NMR (600 MHz, CDCl<sub>3</sub>) δ (ppm) 7.46 (td, *J* = 7.2, 0.6 Hz, 1H), 7.31 (d, *J* = 7.8 Hz, 3H), 7.29 – 7.27 (m, 4H), 7.21 (t, *J* = 7.2 Hz, 2H), 7.04 (d, *J* = 1.8 Hz, 1H), 7.02 (dt, *J* = 8.4, 2.4 Hz, 1H), 6.29 (s, 1H), 6.02 (dd, *J* = 7.8, 0.6 Hz, 1H), 5.08 (d, *J* = 15.6 Hz, 1H), 4.18 (d, *J* = 16.2 Hz, 1H), 2.57 (s, 3H), 2.24 (s, 3H); <sup>13</sup>C NMR (150 MHz, CDCl<sub>3</sub>) δ (ppm) 192.6, 190.9, 176.9, 170.1, 141.4, 135.0, 134.8, 133.7, 131.8, 128.2, 128.9, 128.5, 127.7, 127.7, 127.6, 127.2, 118.6, 115.4, 110.3, 88.8, 62.0, 44.7, 29.1, 16.0; ESI HRMS: calcd. For C<sub>28</sub>H<sub>22</sub>BrNO<sub>4</sub>Na<sup>+</sup> 538.0630, found 538.0632.

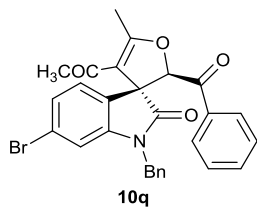

**10q** was obtained as yellow solid, 69% yield (54.5 mg). The diastereomeric ratio was determined to be 10:1 by crude <sup>1</sup>H-NMR analysis. m.p. 184–185 °C; <sup>1</sup>H NMR (600 MHz, CDCl<sub>3</sub>) δ (ppm) 7.47 (tt, *J* = 7.8, 1.2 Hz, 1H), 7.32 – 7.31 (m, 2H), 7.30 – 7.26 (m, 5H), 7.21 (td, *J* = 7.2, 1.2 Hz, 2H), 7.00 (dd, *J* = 7.8, 1.8 Hz, 1H), 6.78 (d, *J* = 7.8 Hz, 1H), 6.31 (d, *J* = 1.8 Hz, 1H), 6.28 (s, 1H), 5.05 (d, *J* = 15.6 Hz, 1H), 4.18 (d, *J* = 16.2 Hz, 1H), 2.55 (s, 3H), 2.21 (s, 3H); <sup>13</sup>C NMR (150 MHz, CDCl<sub>3</sub>) δ (ppm) 192.7, 190.9, 177.3, 170.0, 143.6, 134.8, 134.7, 133.8, 128.9, 128.5, 127.8, 127.5, 127.2, 126.1, 125.9, 125.7, 122.6, 118.5, 112.1, 88.7, 61.8, 44.7, 29.1, 15.9; ESI HRMS: calcd. For C<sub>28</sub>H<sub>22</sub>BrNO<sub>4</sub>Na<sup>+</sup> 538.0630, found 538.0633.

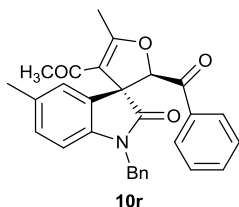

**10r** was obtained as white solid, 80% yield (54.1 mg). The diastereomeric ratio was determined to be 18:1 by crude <sup>1</sup>H-NMR analysis. m.p. 162–163 °C; <sup>1</sup>H NMR (400 MHz, CDCl<sub>3</sub>) δ (ppm) 7.42 (t, *J* = 7.2 Hz, 1H), 7.25 (d, *J* = 4.4 Hz, 4H), 7.25 (d, *J* = 7.2 Hz, 3H), 7.16 (t, *J* = 7.6 Hz, 2H), 6.74 (s, 1H), 6.70 (d, *J* = 8.0 Hz, 1H), 6.29 (s, 1H), 6.05 (d, *J* = 8.0 Hz, 1H), 5.06 (d, *J* = 16.0 Hz, 1H), 4.16 (d, *J* = 16.0 Hz, 1H), 2.56 (s, 3H), 2.18 (s, 3H), 2.13 (s, 3H); <sup>13</sup>C NMR (100 MHz, CDCl<sub>3</sub>) δ (ppm) 193.0, 191.1, 177.1, 169.9, 139.8, 135.4, 135.1, 133.3, 132.3, 129.2, 128.7, 128.5, 128.4, 128.3, 127.5, 127.4, 127.3, 126.9, 125.4, 118.4, 108.5, 89.1, 62.0, 44.6, 29.0, 20.9, 15.9; ESI HRMS: calcd. For C<sub>29</sub>H<sub>25</sub>NO<sub>4</sub>Na<sup>+</sup> 474.1681, found 474.1683.

## 5. Crystal data of 6r and 10a

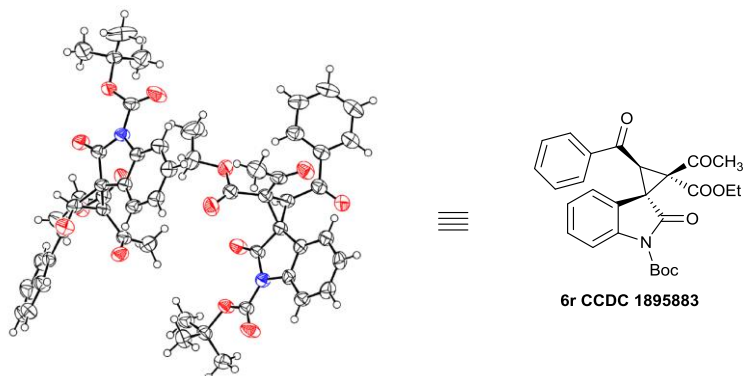

|                                             |                                                               |
|---------------------------------------------|---------------------------------------------------------------|
| Identification code                         | ljl-kjw-2-230k                                                |
| Empirical formula                           | C <sub>27</sub> H <sub>27</sub> NO <sub>7</sub>               |
| Formula weight                              | 477.49                                                        |
| Temperature/K                               | 230                                                           |
| Crystal system                              | orthorhombic                                                  |
| Space group                                 | Pna2 <sub>1</sub>                                             |
| a/Å                                         | 21.1261(6)                                                    |
| b/Å                                         | 24.8124(6)                                                    |
| c/Å                                         | 9.1976(2)                                                     |
| α/°                                         | 90                                                            |
| β/°                                         | 90                                                            |
| γ/°                                         | 90                                                            |
| Volume/Å <sup>3</sup>                       | 4821.3(2)                                                     |
| Z                                           | 8                                                             |
| ρ <sub>calc</sub> /cm <sup>3</sup>          | 1.316                                                         |
| μ/mm <sup>-1</sup>                          | 0.788                                                         |
| F(000)                                      | 2016.0                                                        |
| Crystal size/mm <sup>3</sup>                | 0.65 × 0.5 × 0.25                                             |
| Radiation                                   | CuKα (λ = 1.54184)                                            |
| 2θ range for data collection/°              | 10.258 to 145.272                                             |
| Index ranges                                | -25 ≤ h ≤ 19, -30 ≤ k ≤ 26, -5 ≤ l ≤ 11                       |
| Reflections collected                       | 14596                                                         |
| Independent reflections                     | 6174 [R <sub>int</sub> = 0.0336, R <sub>sigma</sub> = 0.0337] |
| Data/restraints/parameters                  | 6174/1/641                                                    |
| Goodness-of-fit on F <sup>2</sup>           | 1.069                                                         |
| Final R indexes [I ≥ 2σ (I)]                | R <sub>1</sub> = 0.0568, wR <sub>2</sub> = 0.1589             |
| Final R indexes [all data]                  | R <sub>1</sub> = 0.0612, wR <sub>2</sub> = 0.1641             |
| Largest diff. peak/hole / e Å <sup>-3</sup> | 0.26/-0.32                                                    |
| Flack parameter                             | 0.29(17)                                                      |

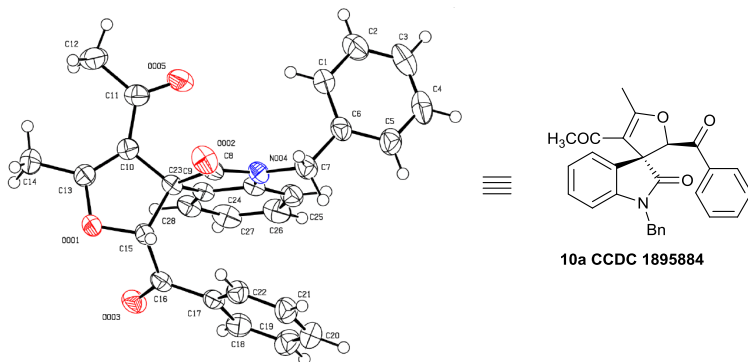

|                                             |                                                               |
|---------------------------------------------|---------------------------------------------------------------|
| Identification code                         | ljl-kjw-1-230k                                                |
| Empirical formula                           | C <sub>28</sub> H <sub>23</sub> NO <sub>4</sub>               |
| Formula weight                              | 437.47                                                        |
| Temperature/K                               | 230                                                           |
| Crystal system                              | monoclinic                                                    |
| Space group                                 | P2 <sub>1</sub> /n                                            |
| a/Å                                         | 10.0593(3)                                                    |
| b/Å                                         | 14.8180(5)                                                    |
| c/Å                                         | 14.6664(6)                                                    |
| α/°                                         | 90                                                            |
| β/°                                         | 97.286(3)                                                     |
| γ/°                                         | 90                                                            |
| Volume/Å <sup>3</sup>                       | 2168.50(14)                                                   |
| Z                                           | 4                                                             |
| ρ <sub>calc</sub> /cm <sup>3</sup>          | 1.340                                                         |
| μ/mm <sup>-1</sup>                          | 0.723                                                         |
| F(000)                                      | 920.0                                                         |
| Crystal size/mm <sup>3</sup>                | 0.6 × 0.5 × 0.4                                               |
| Radiation                                   | CuKα (λ = 1.54184)                                            |
| 2θ range for data collection/°              | 10.094 to 144.7                                               |
| Index ranges                                | -10 ≤ h ≤ 12, -17 ≤ k ≤ 17, -18 ≤ l ≤ 16                      |
| Reflections collected                       | 11047                                                         |
| Independent reflections                     | 4203 [R <sub>int</sub> = 0.0224, R <sub>sigma</sub> = 0.0215] |
| Data/restraints/parameters                  | 4203/0/300                                                    |
| Goodness-of-fit on F <sup>2</sup>           | 1.064                                                         |
| Final R indexes [I ≥ 2σ(I)]                 | R <sub>1</sub> = 0.0544, wR <sub>2</sub> = 0.1494             |
| Final R indexes [all data]                  | R <sub>1</sub> = 0.0585, wR <sub>2</sub> = 0.1536             |
| Largest diff. peak/hole / e Å <sup>-3</sup> | 0.23/-0.37                                                    |

## 6. NMR spectra and HPLC chromatograms

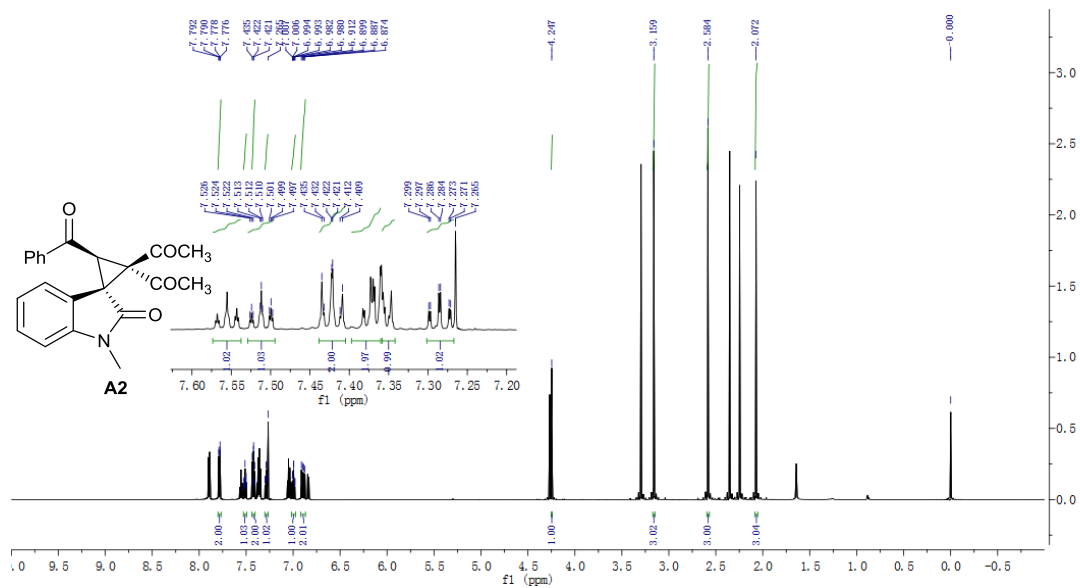

<sup>1</sup>H spectrum of A2 in CDCl<sub>3</sub> (d.r. = 1:1)

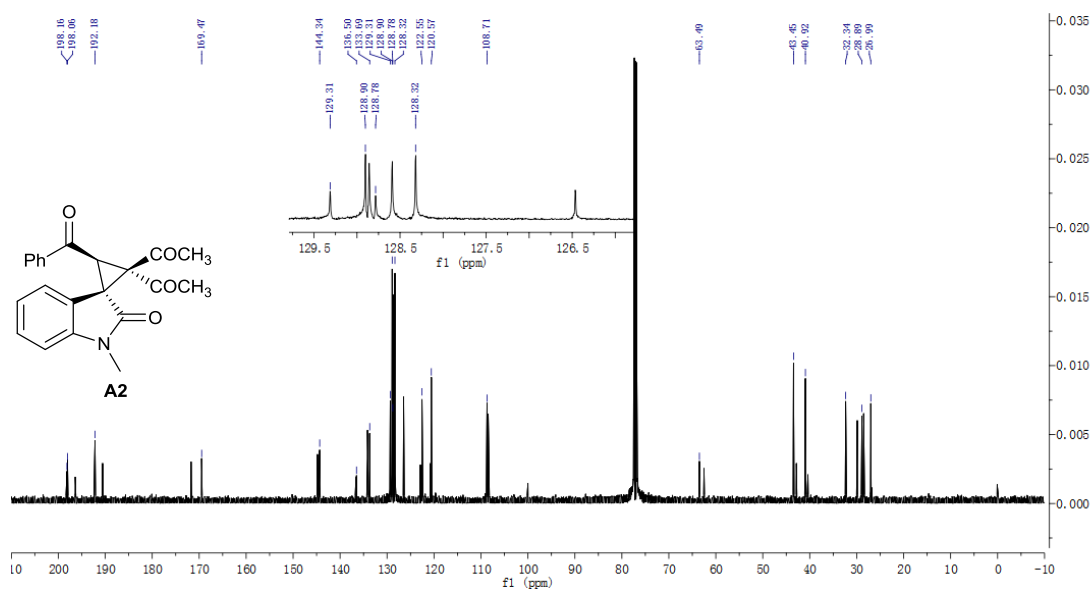

<sup>13</sup>C spectrum of A2 in CDCl<sub>3</sub>



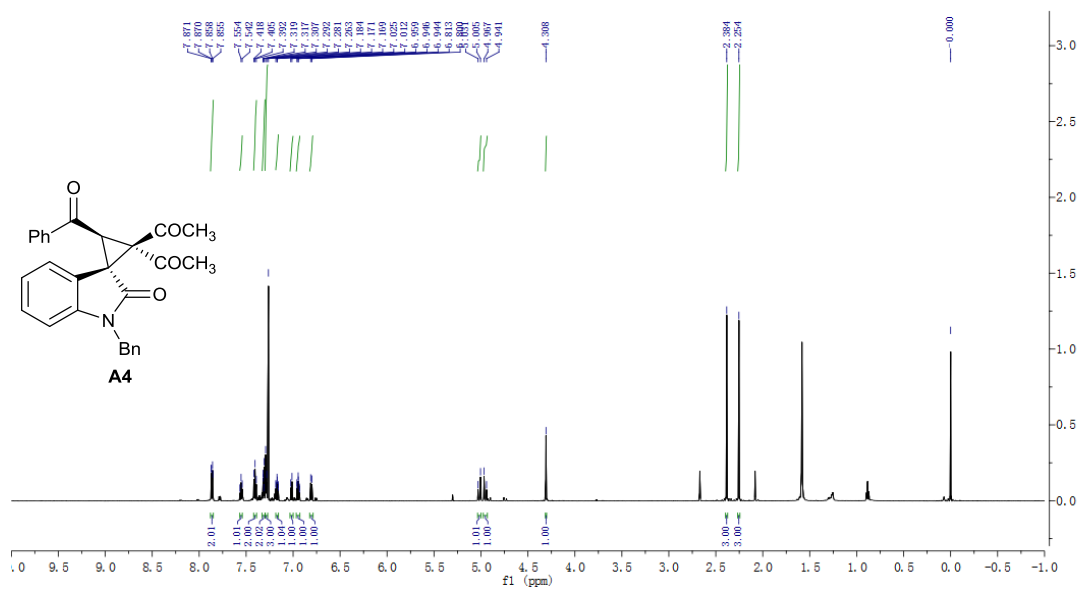

<sup>1</sup>H spectrum of A4 in CDCl<sub>3</sub> (d.r. = 7:1)

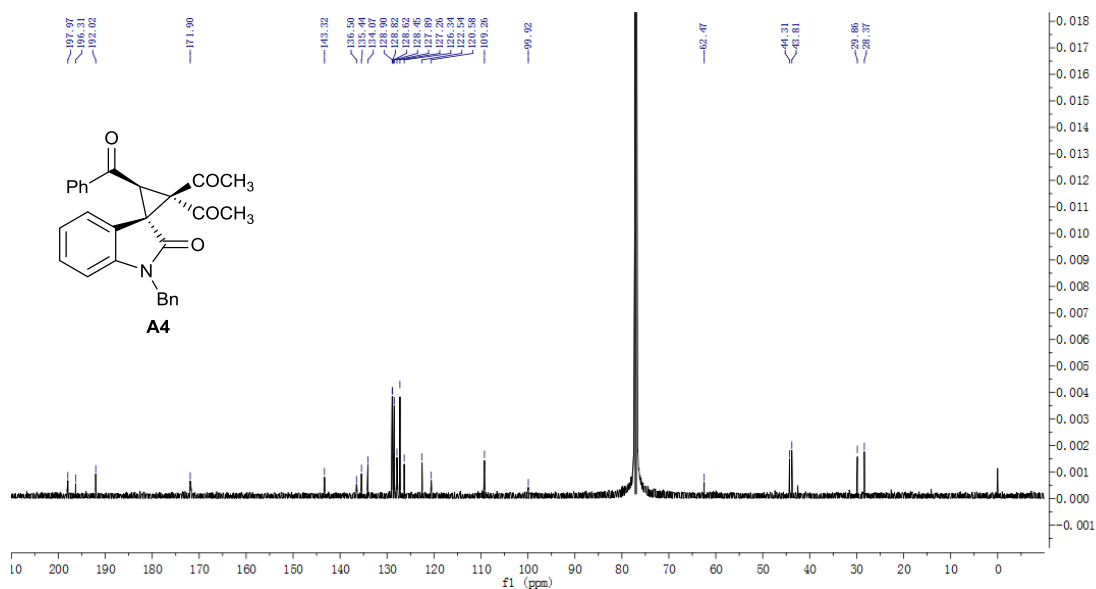

<sup>13</sup>C spectrum of A4 in CDCl<sub>3</sub>

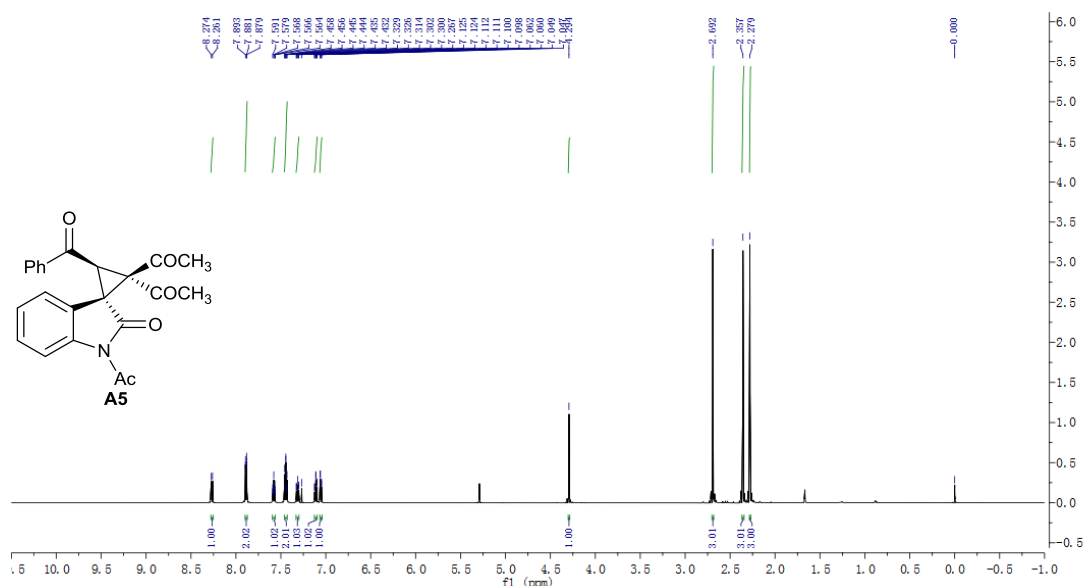

<sup>1</sup>H spectrum of A5 in CDCl<sub>3</sub> (d.r. =20:1)

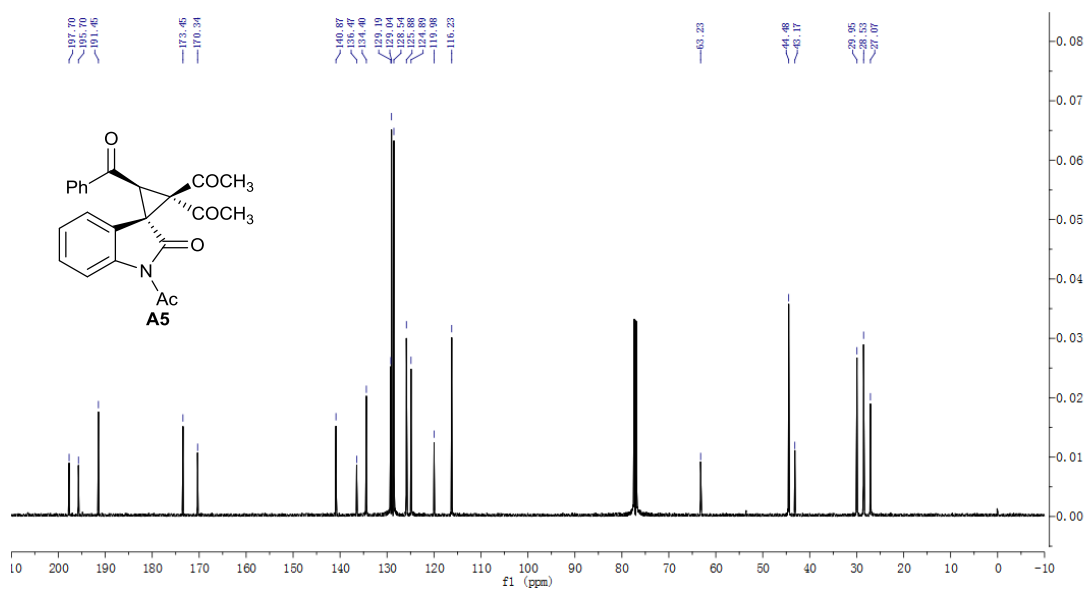

<sup>13</sup>C spectrum of A5 in CDCl<sub>3</sub>





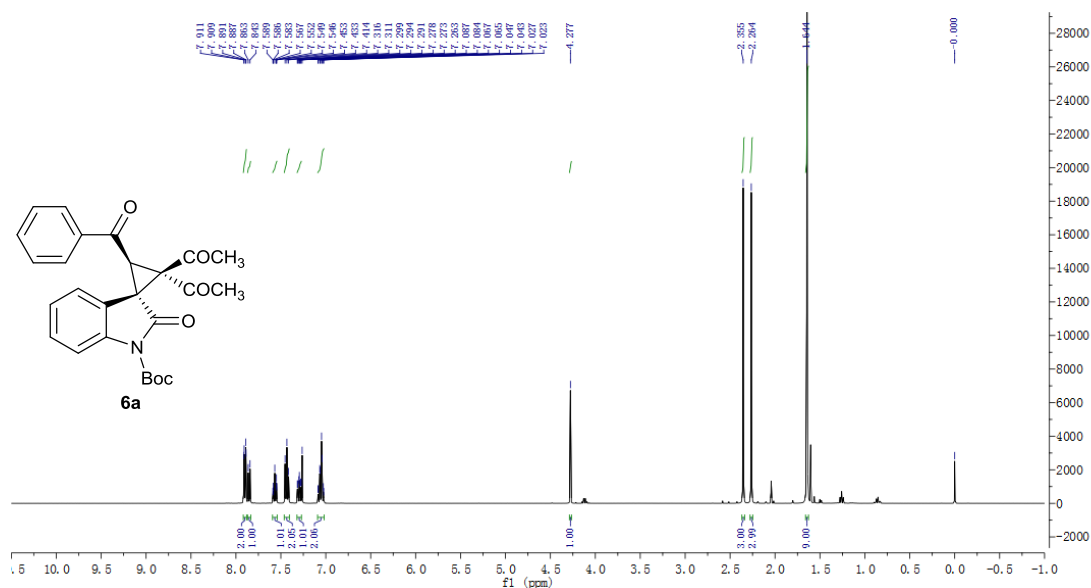

<sup>1</sup>H NMR spectrum of **6a** in CDCl<sub>3</sub> (d.r. = 20:1)

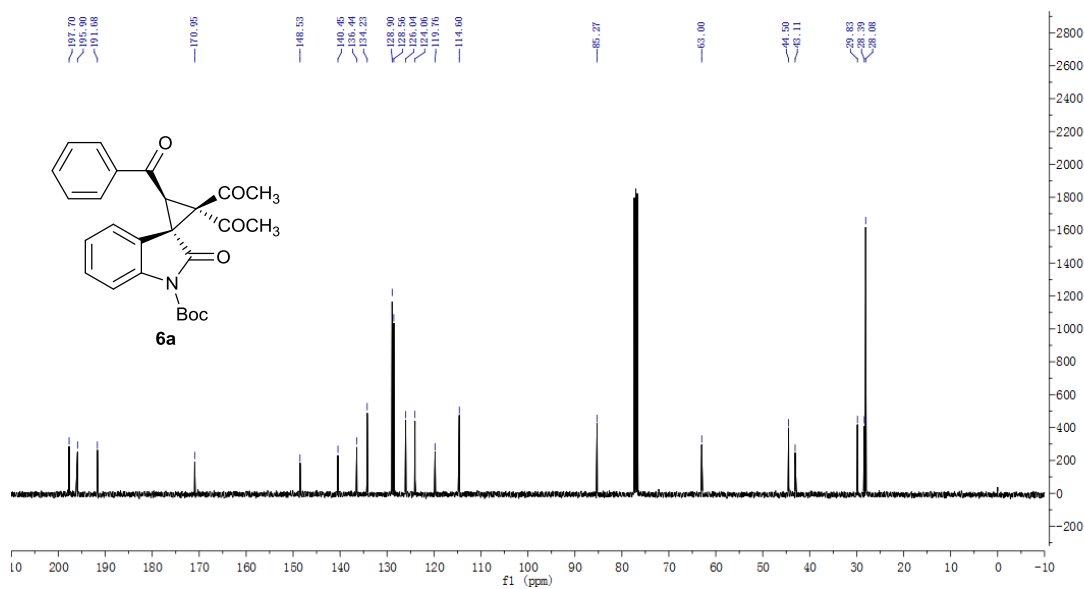

<sup>13</sup>C NMR spectrum of **6a** in CDCl<sub>3</sub>



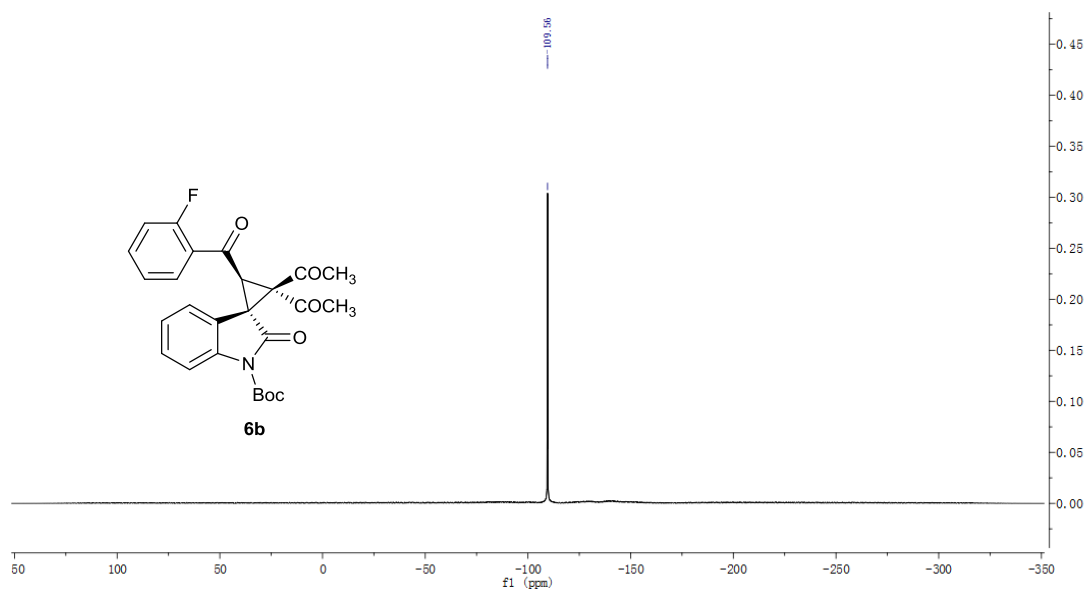

$^{19}\text{F}$  NMR spectrum of **6b** in  $\text{CDCl}_3$

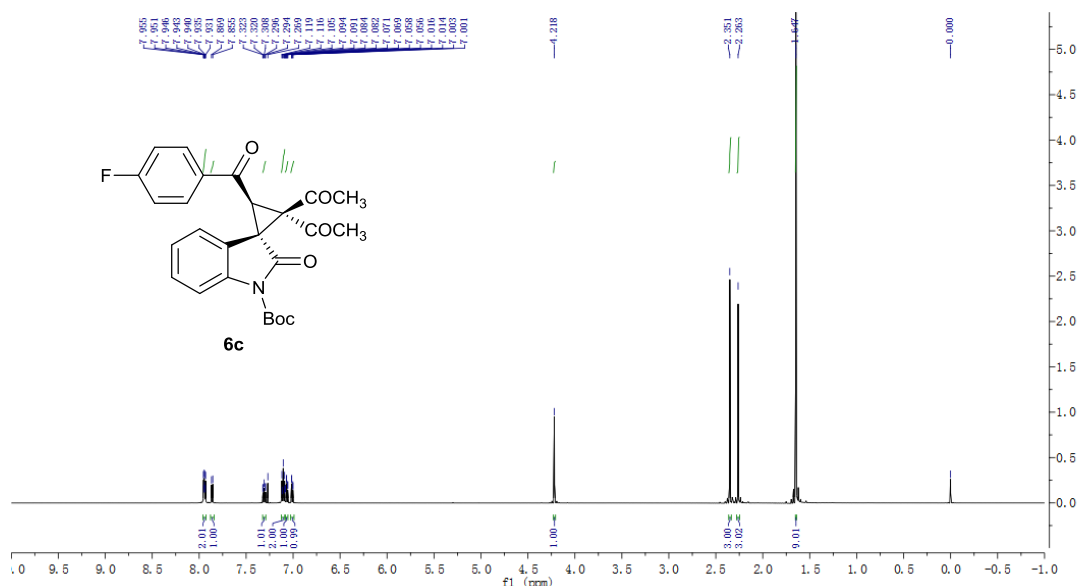

<sup>1</sup>H NMR spectrum of **6c** in CDCl<sub>3</sub> (d.r. = 20:1)

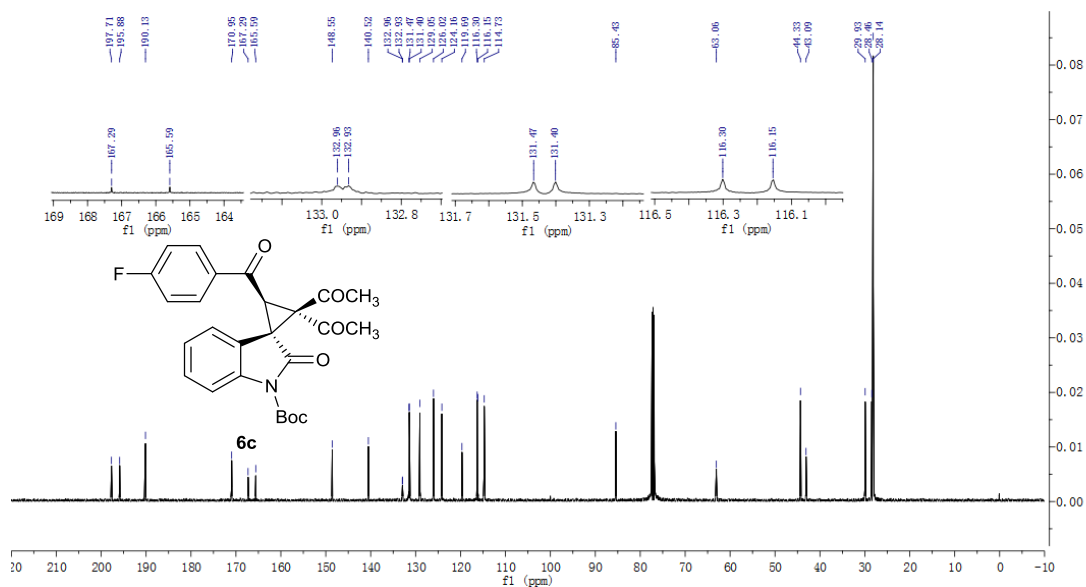

<sup>13</sup>C NMR spectrum of **6c** in CDCl<sub>3</sub>

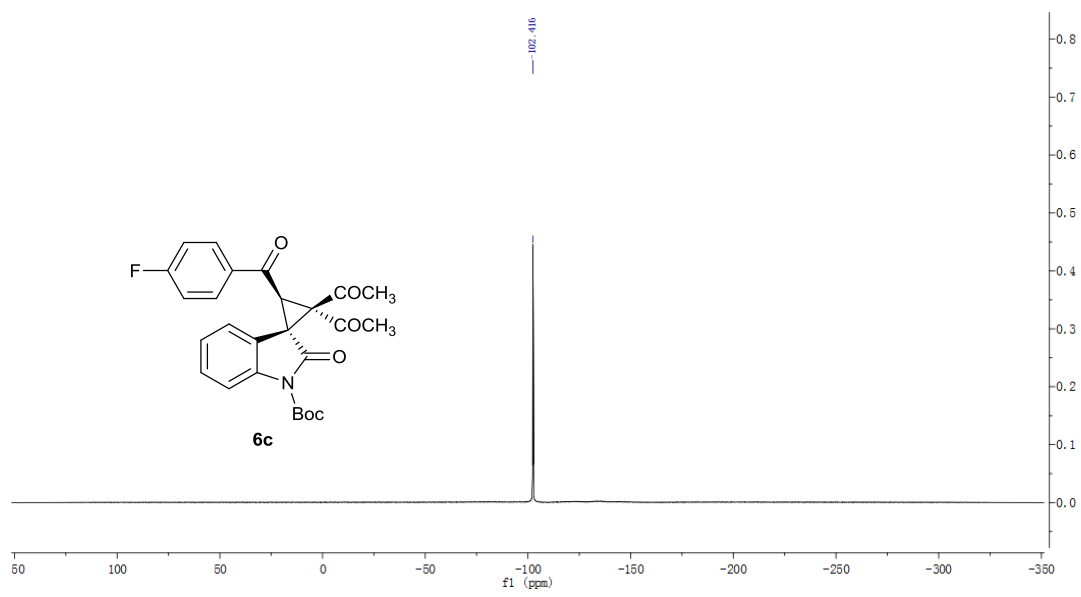

$^{19}\text{F}$  NMR spectrum of **6c** in  $\text{CDCl}_3$

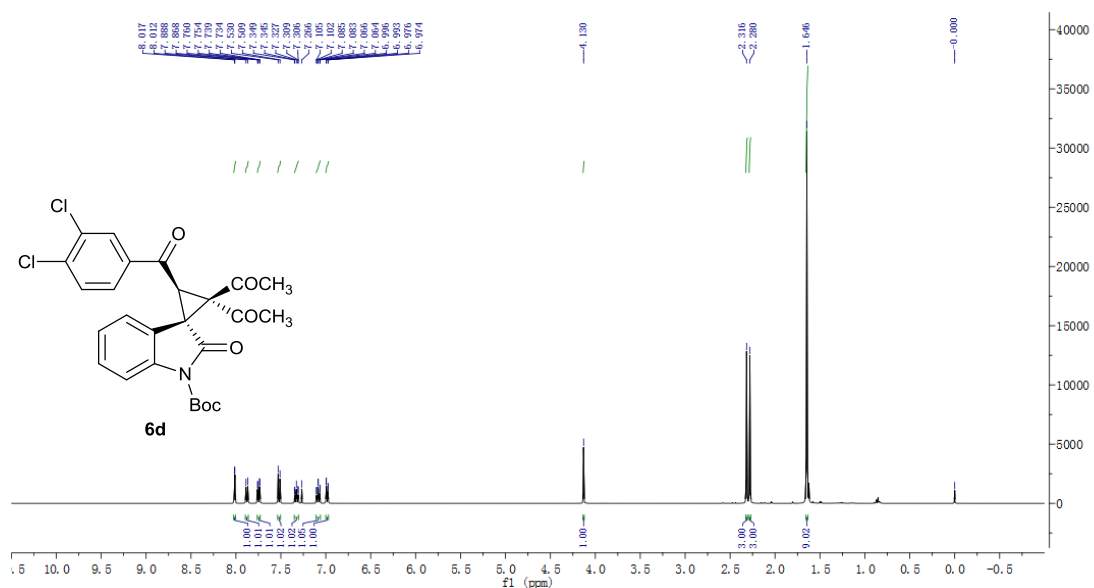

<sup>1</sup>H NMR spectrum of **6d** in CDCl<sub>3</sub> (d.r. = 20:1)

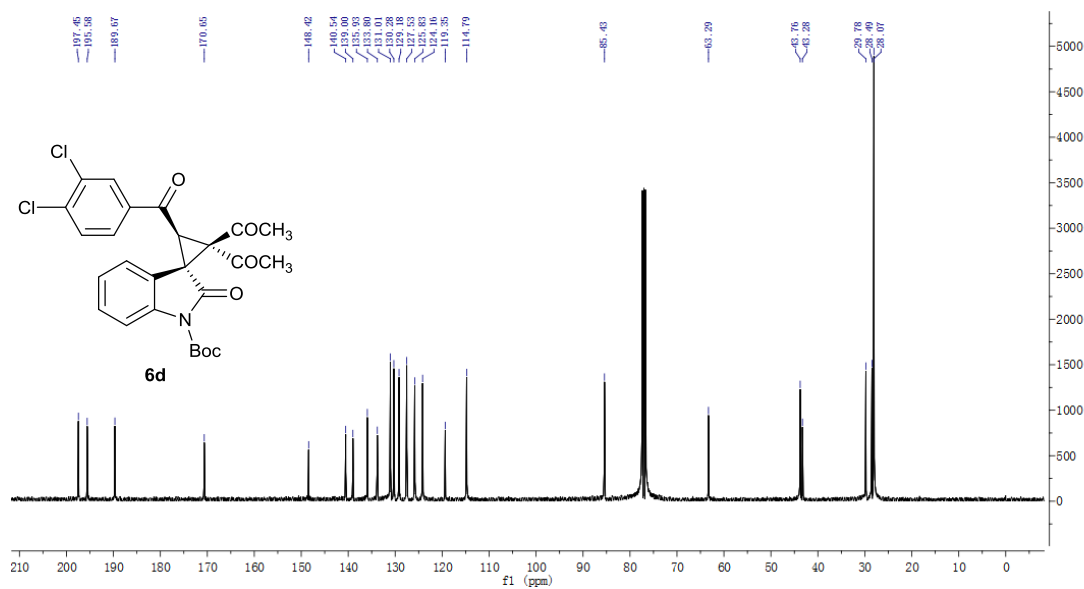

<sup>13</sup>C NMR spectrum of **6d** in CDCl<sub>3</sub>

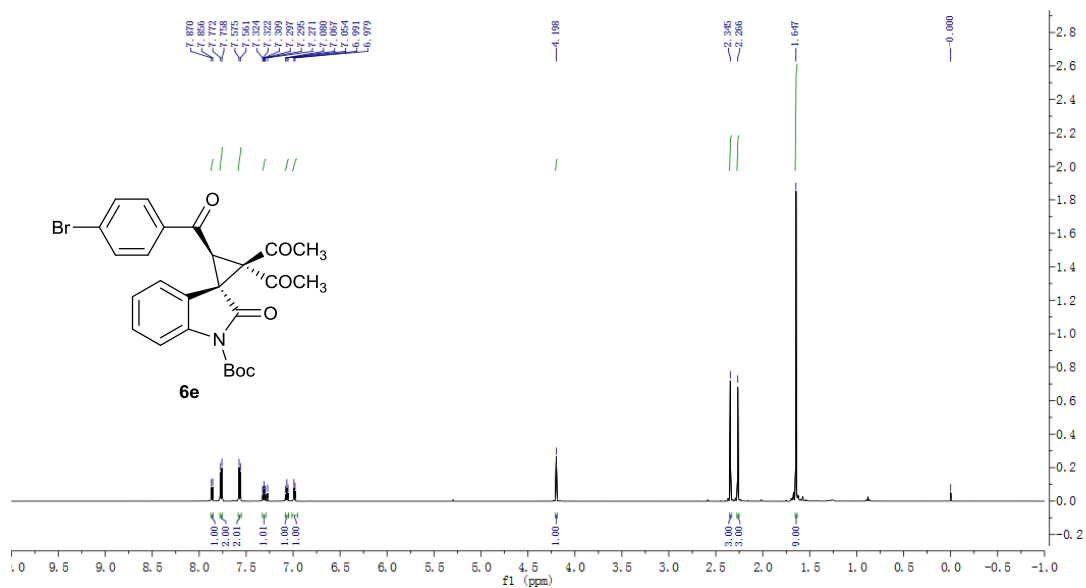

<sup>1</sup>H NMR spectrum of **6e** in CDCl<sub>3</sub> (d.r. = 18:1)

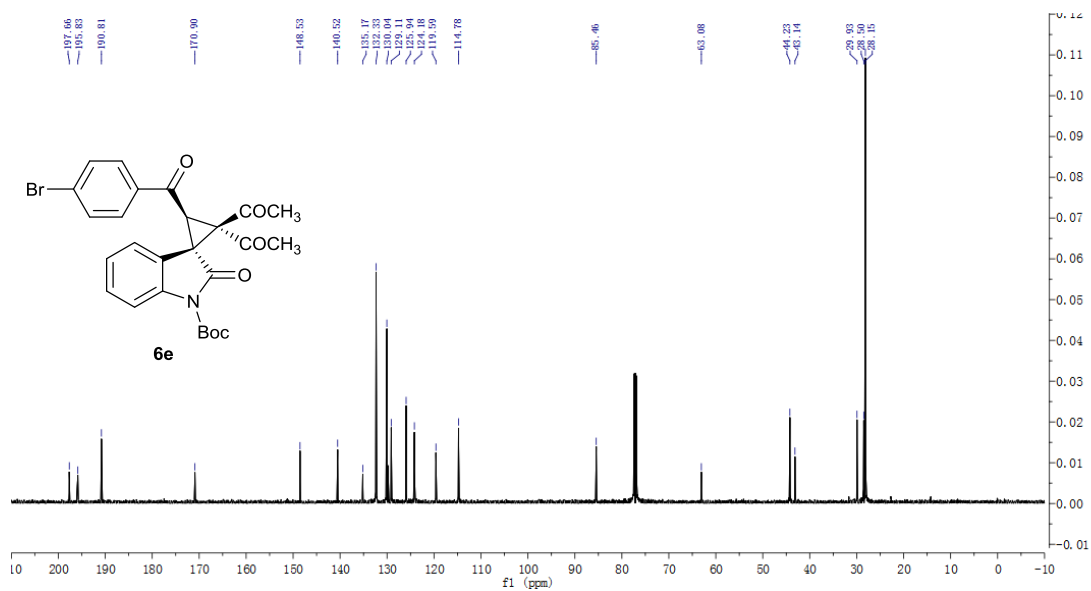

<sup>13</sup>C NMR spectrum of **6e** in CDCl<sub>3</sub>



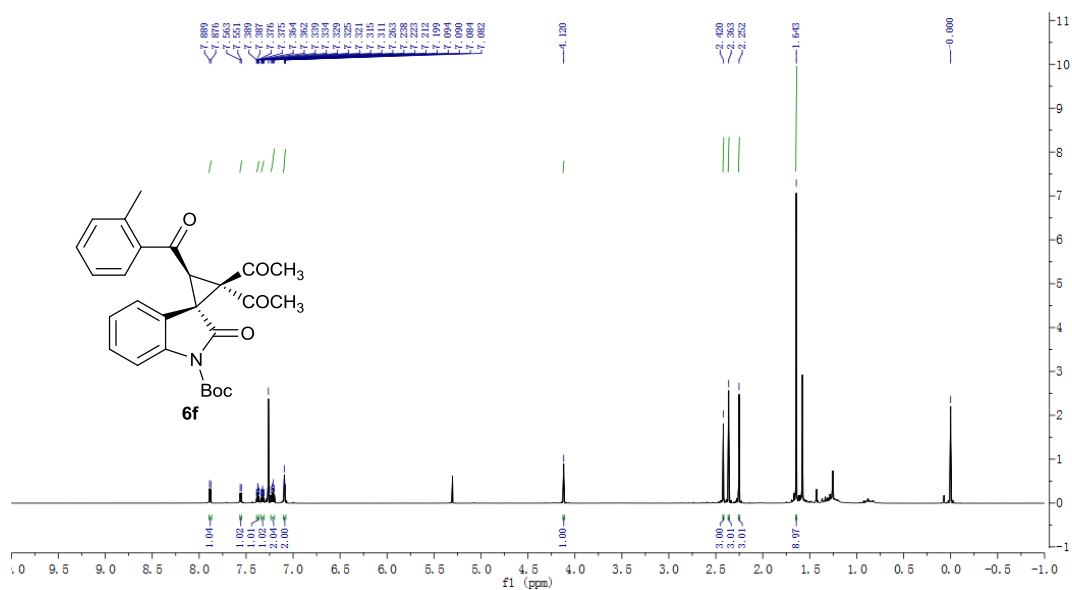

$^1\text{H}$  NMR spectrum of **6f** in  $\text{CDCl}_3$  (d.r. = 20:1)

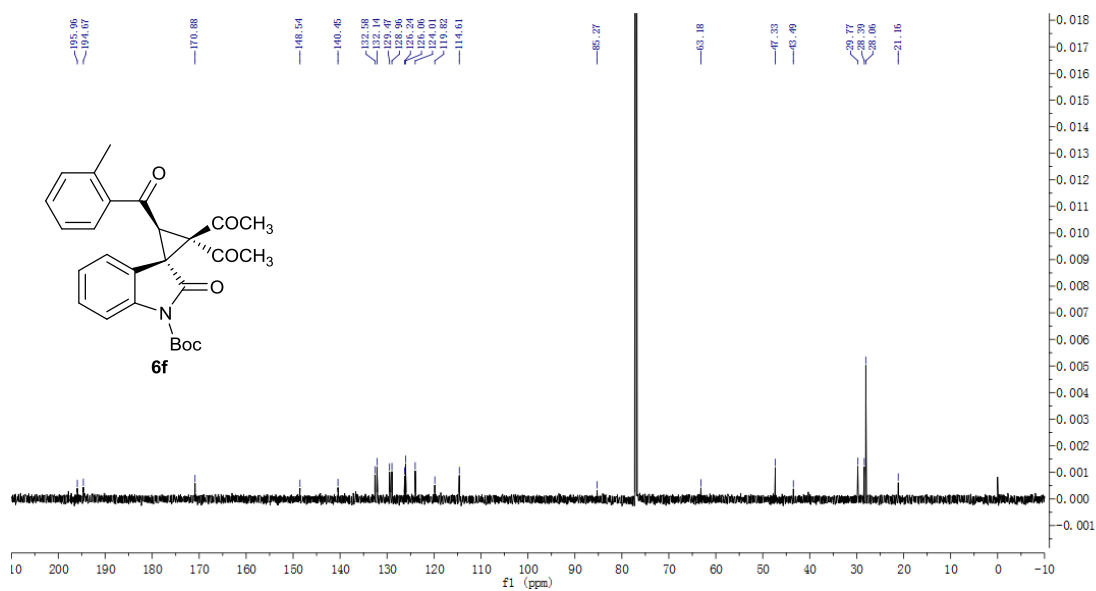

$^{13}\text{C}$  NMR spectrum of **6f** in  $\text{CDCl}_3$

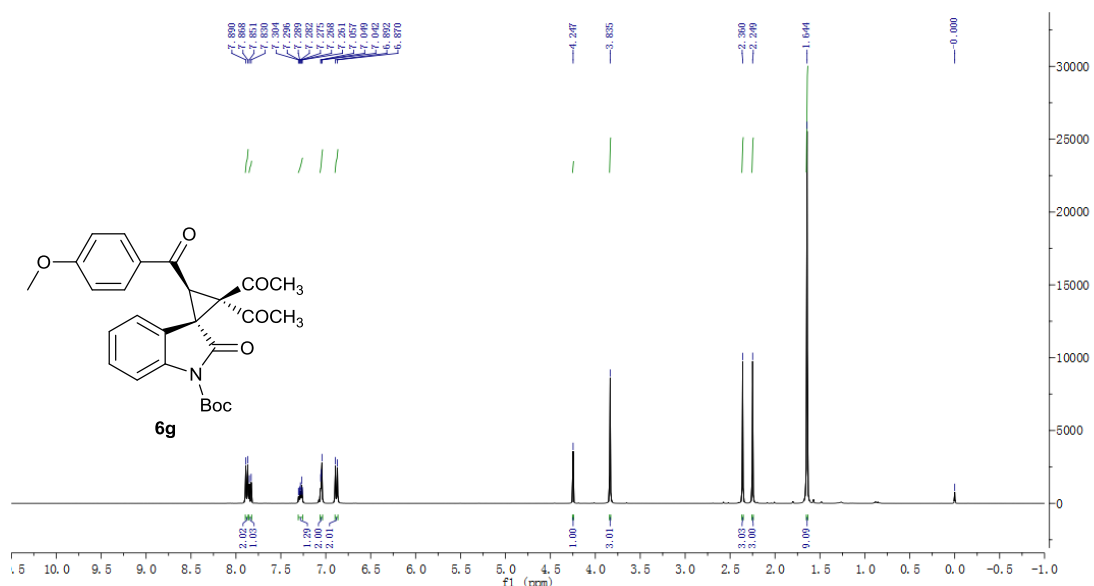

<sup>1</sup>H NMR spectrum of **6g** in CDCl<sub>3</sub> (d.r. = 20:1)

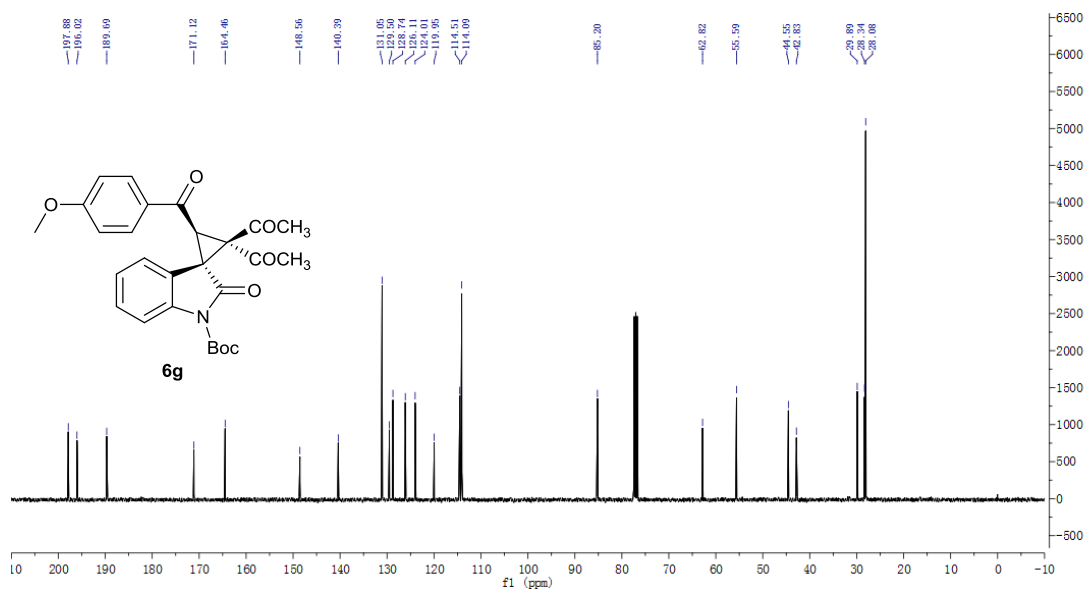

<sup>13</sup>C NMR spectrum of **6g** in CDCl<sub>3</sub>

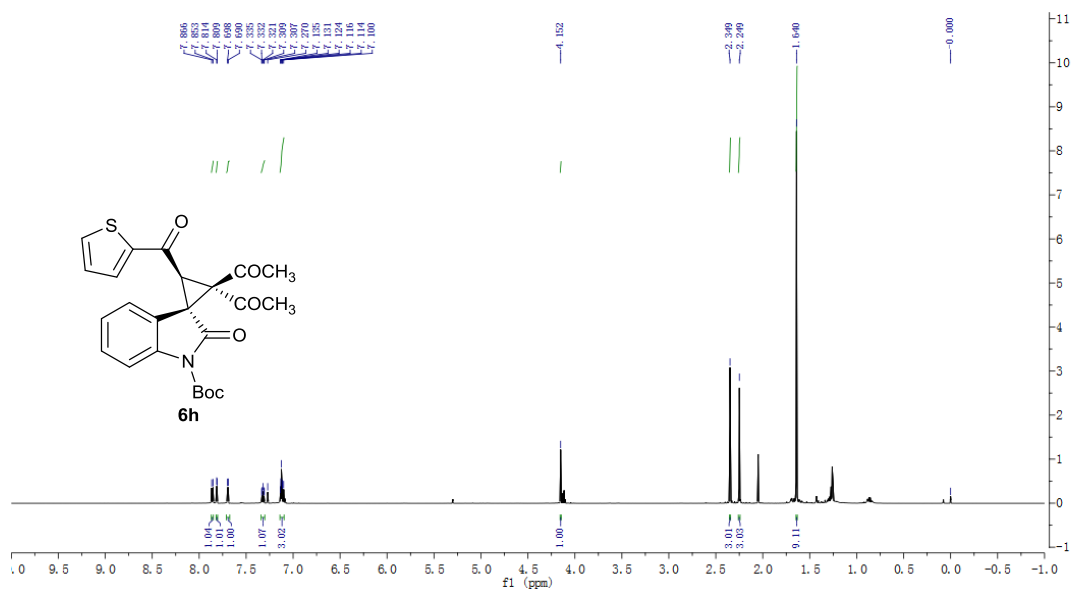

<sup>1</sup>H NMR spectrum of **6h** in CDCl<sub>3</sub> (d.r. = 20:1)

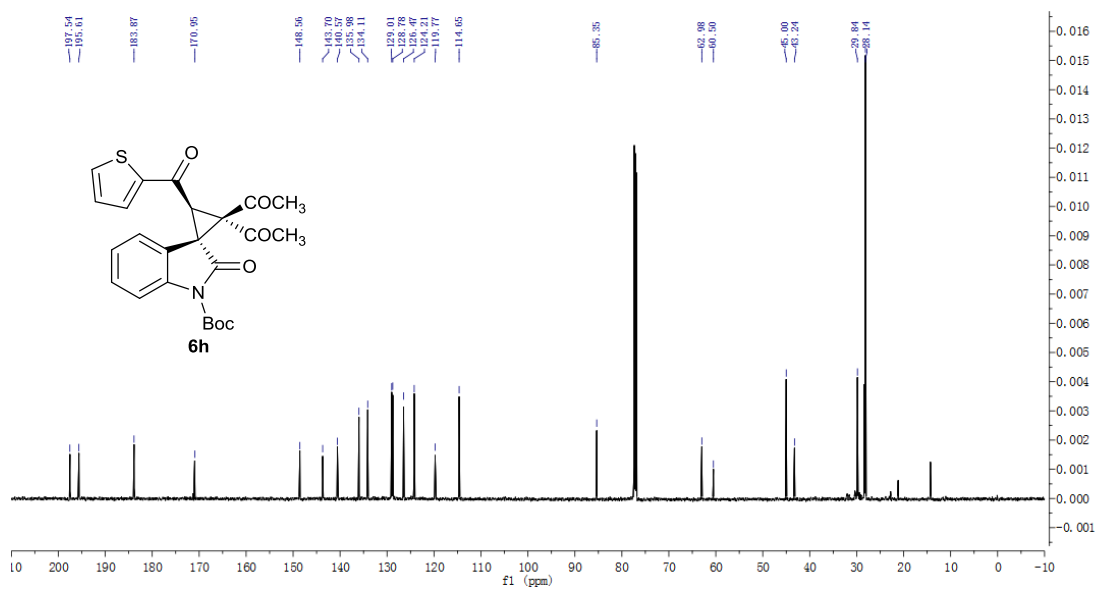

<sup>13</sup>C NMR spectrum of **6h** in CDCl<sub>3</sub>

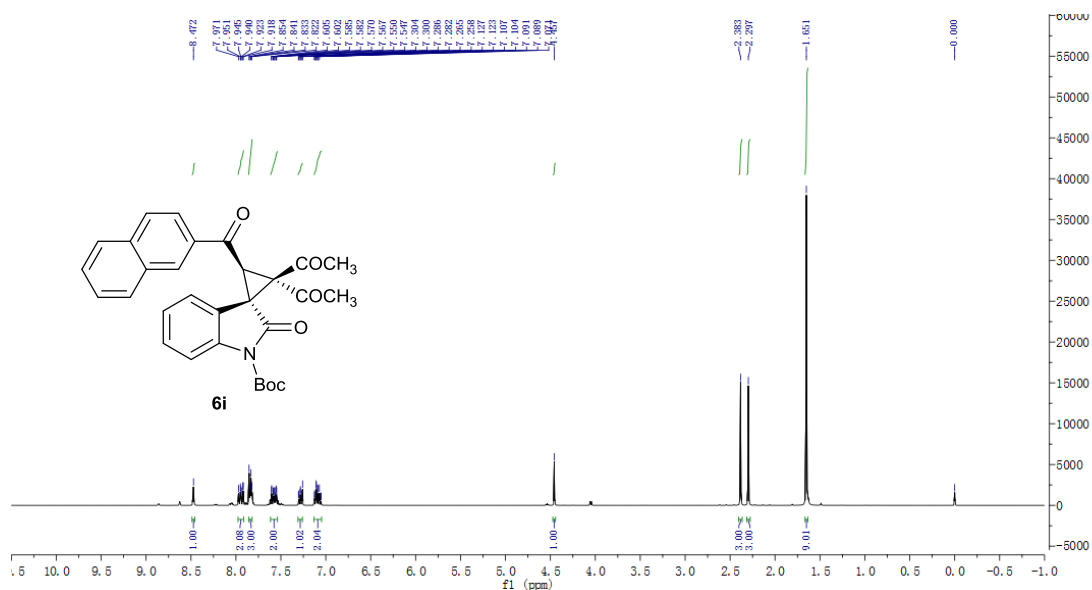

<sup>1</sup>H NMR spectrum of **6i** in CDCl<sub>3</sub> (d.r. = 10:1)

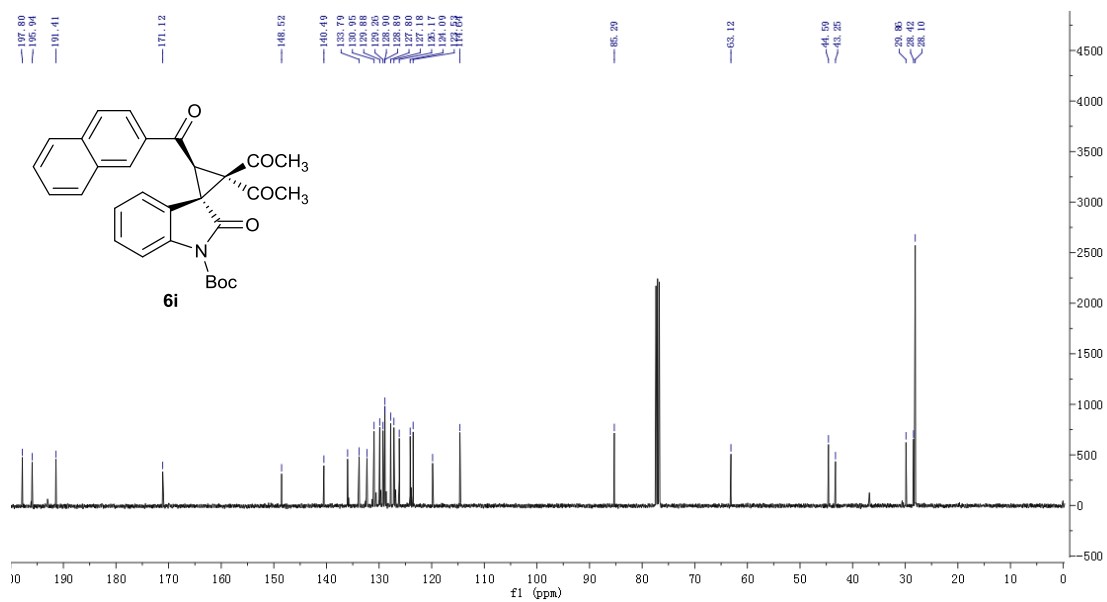

<sup>13</sup>C NMR spectrum of **6i** in CDCl<sub>3</sub>

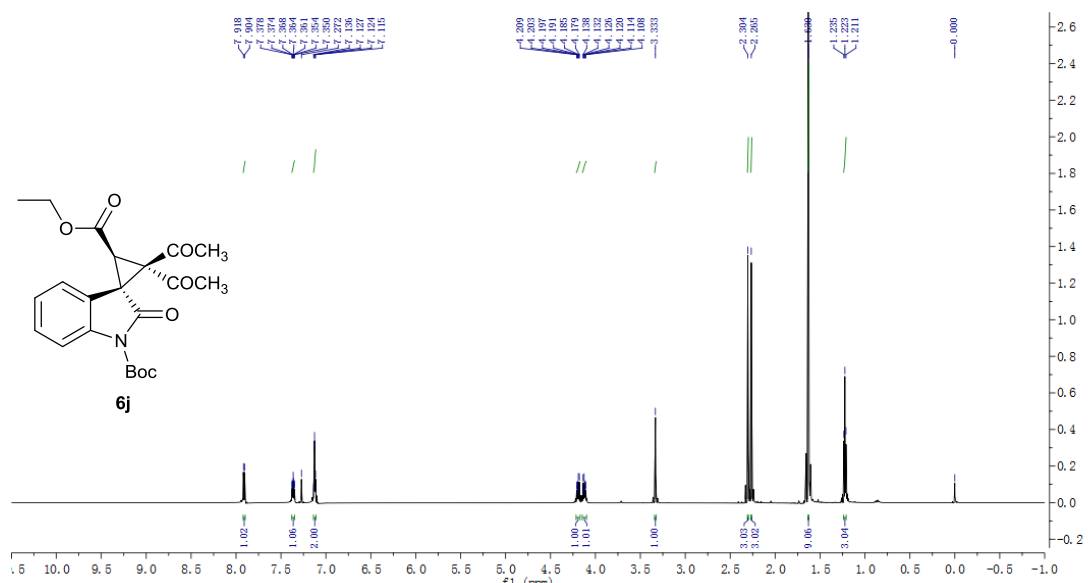

$^1\text{H}$  NMR spectrum of **6j** in  $\text{CDCl}_3$  (d.r. = 20:1)

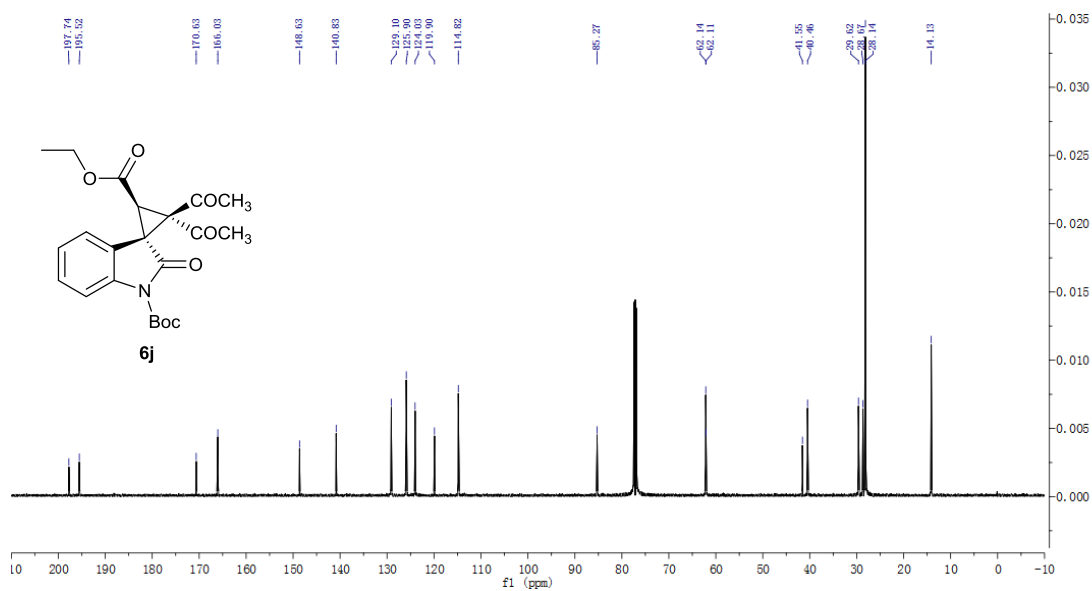

$^{13}\text{C}$  NMR spectrum of **6j** in  $\text{CDCl}_3$

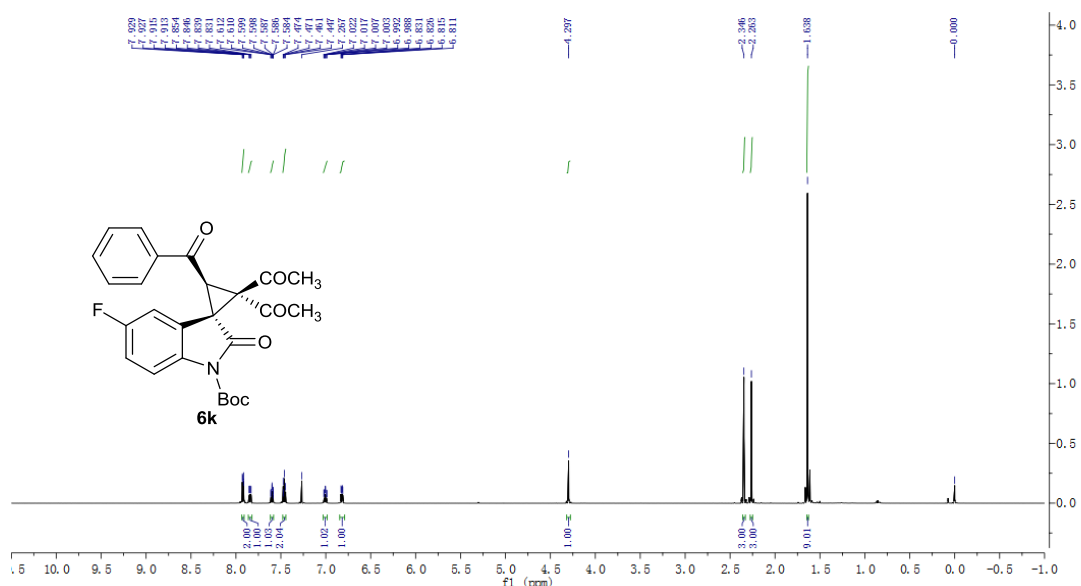

<sup>1</sup>H NMR spectrum of **6k** in CDCl<sub>3</sub> (d.r. = 13:1)

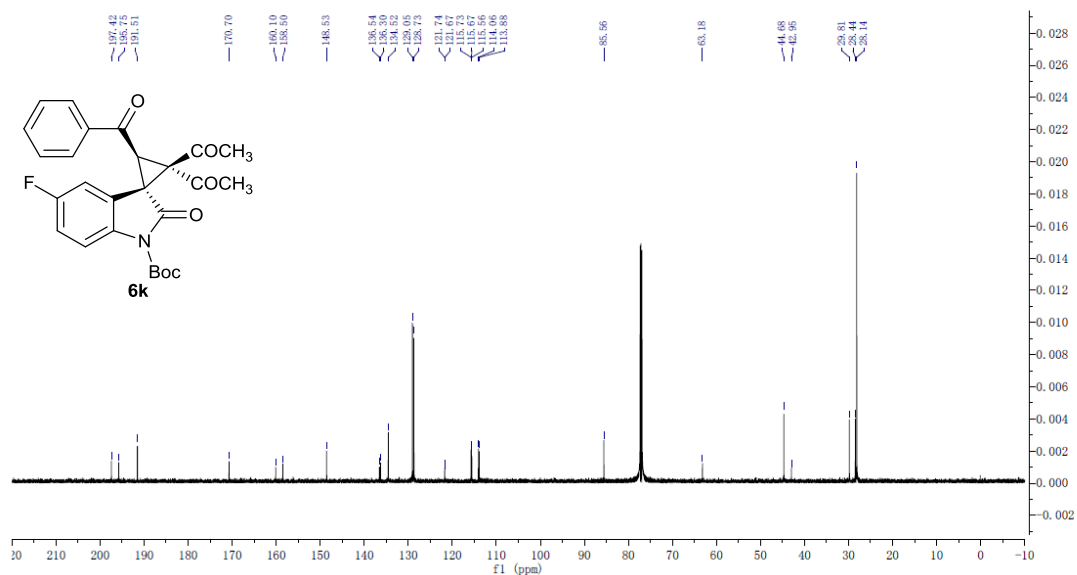

<sup>13</sup>C NMR spectrum of **6k** in CDCl<sub>3</sub>

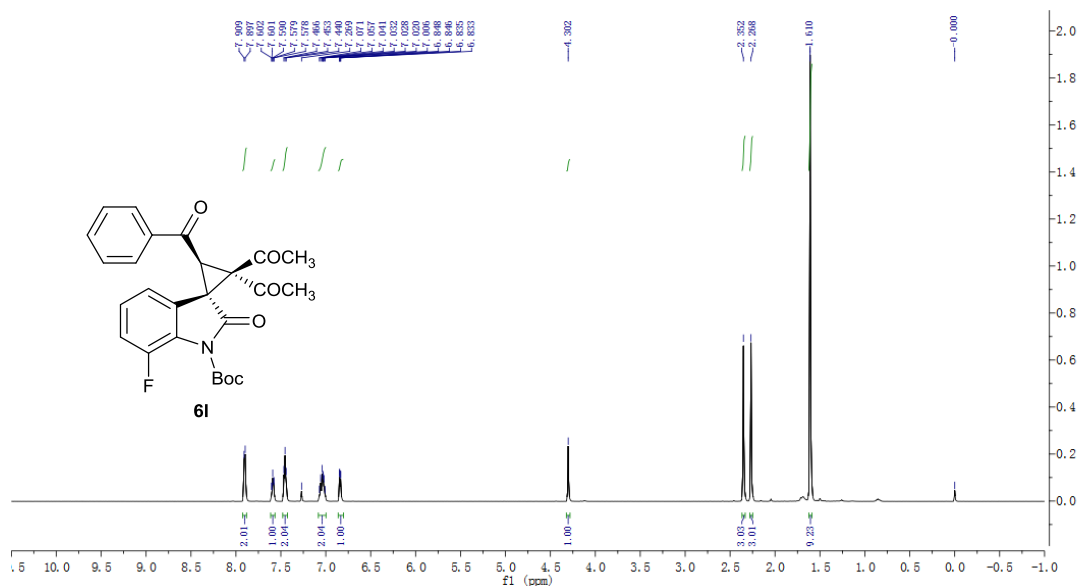

<sup>1</sup>H NMR spectrum of **6l** in CDCl<sub>3</sub> (d.r. = 20:1)

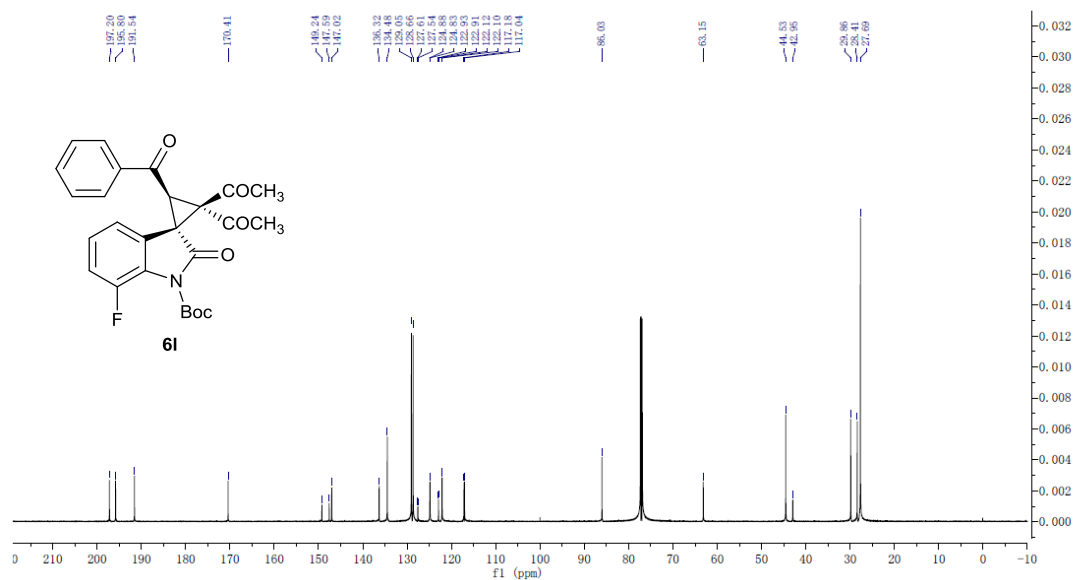

<sup>13</sup>C NMR spectrum of **6l** in CDCl<sub>3</sub>

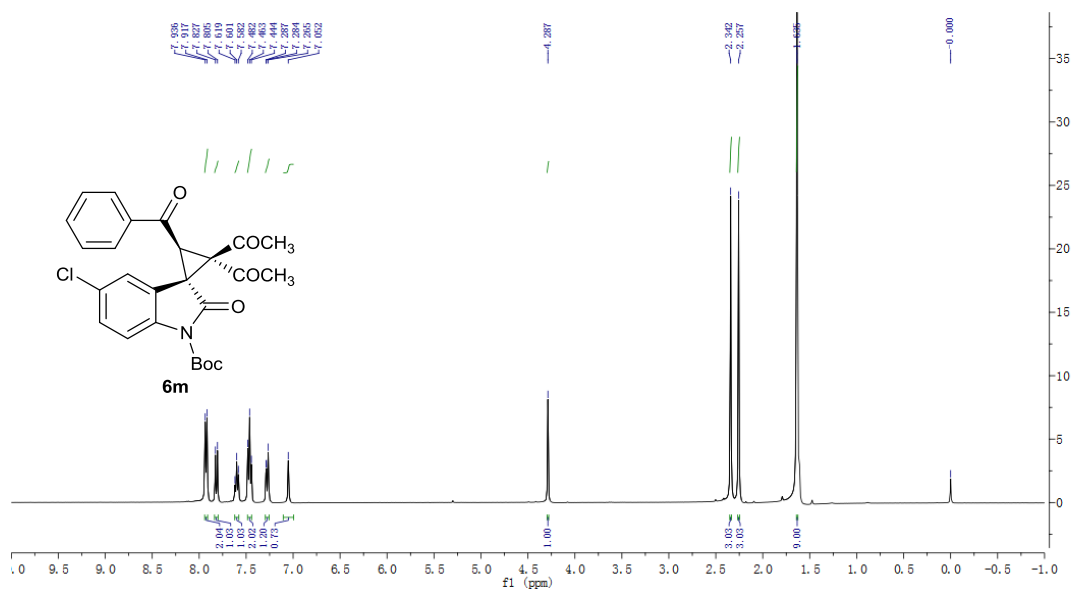

<sup>1</sup>H NMR spectrum of **6m** in CDCl<sub>3</sub> (d.r. = 20:1)

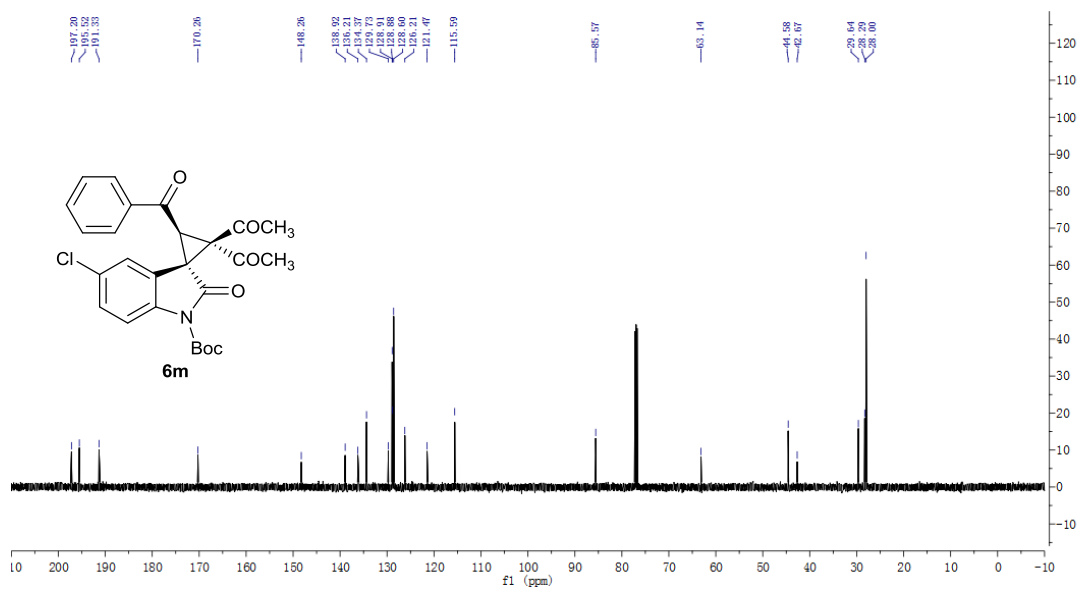

<sup>13</sup>C NMR spectrum of **6m** in CDCl<sub>3</sub>





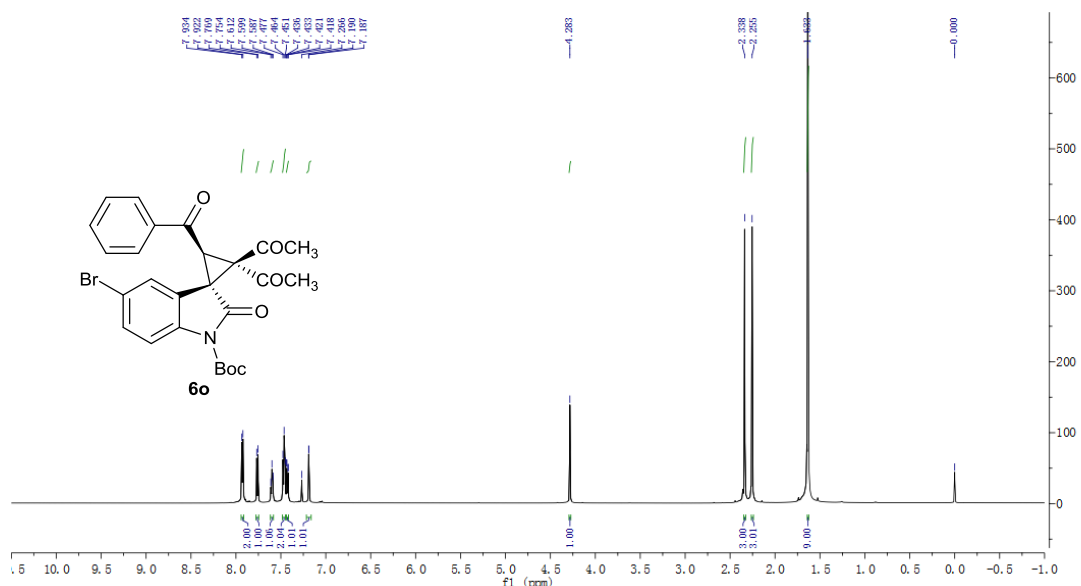

$^1\text{H}$  NMR spectrum of **6o** in  $\text{CDCl}_3$  (d.r. = 15:1)

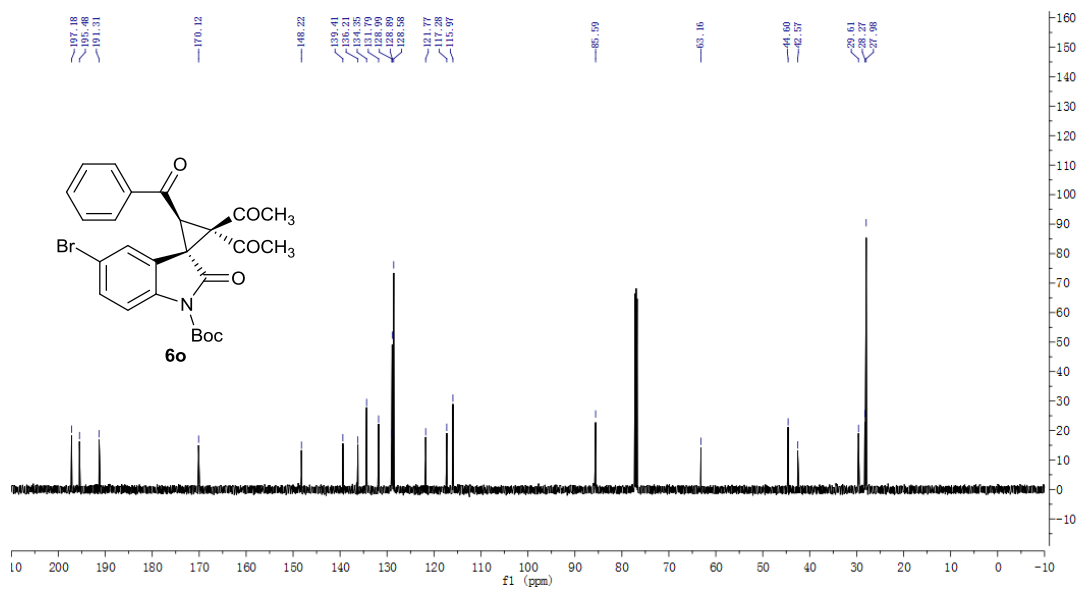

$^{13}\text{C}$  NMR spectrum of **6o** in  $\text{CDCl}_3$

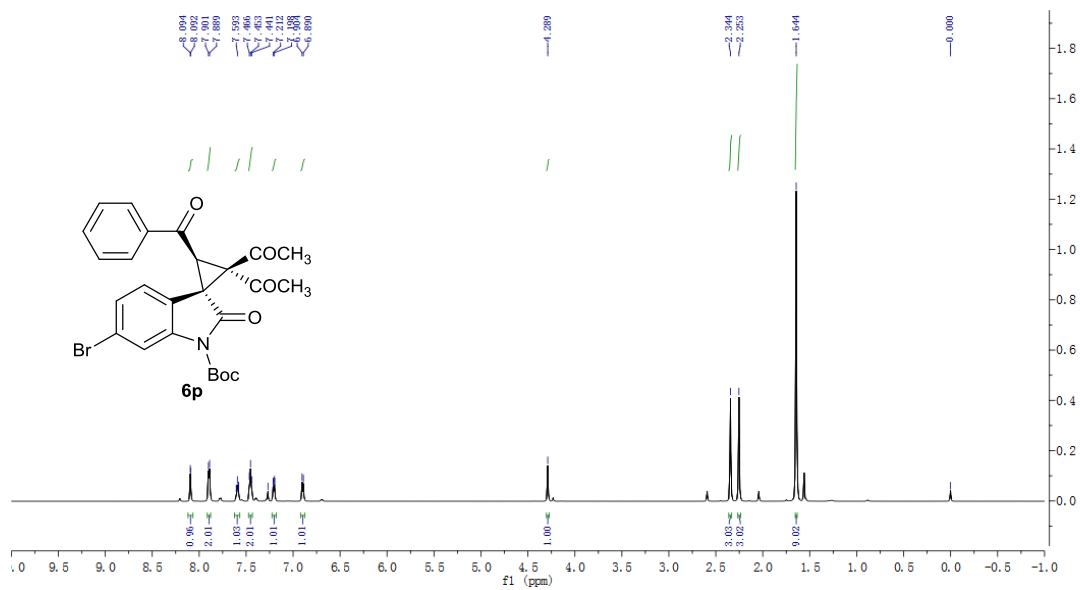

<sup>1</sup>H NMR spectrum of **6p** in CDCl<sub>3</sub> (d.r. = 9:1)

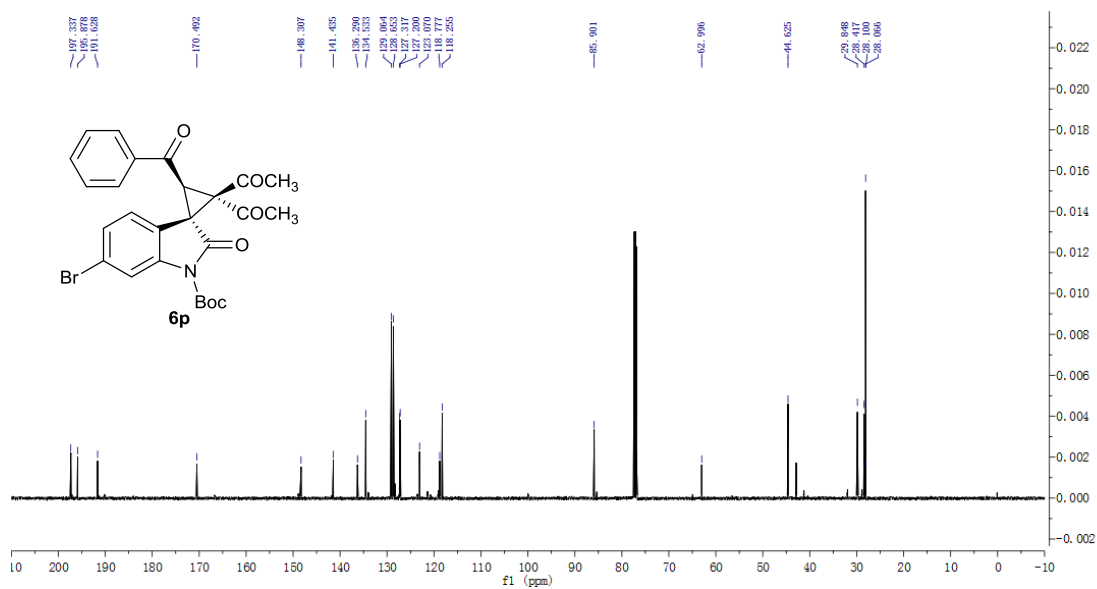

<sup>13</sup>C NMR spectrum of **6p** in CDCl<sub>3</sub>

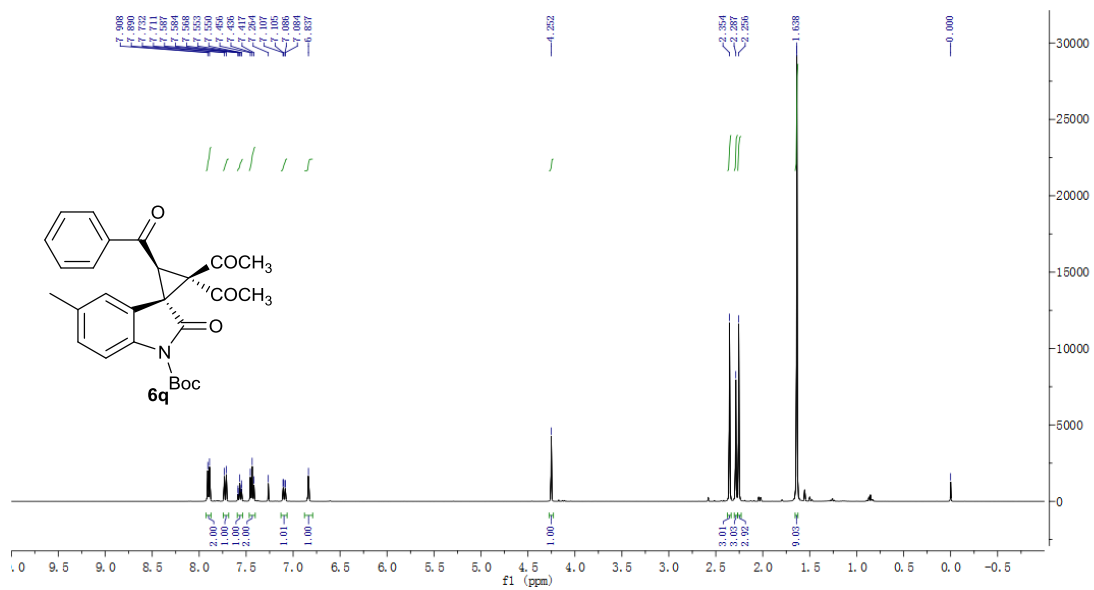

<sup>1</sup>H NMR spectrum of **6q** in CDCl<sub>3</sub> (d.r. = 15:1)

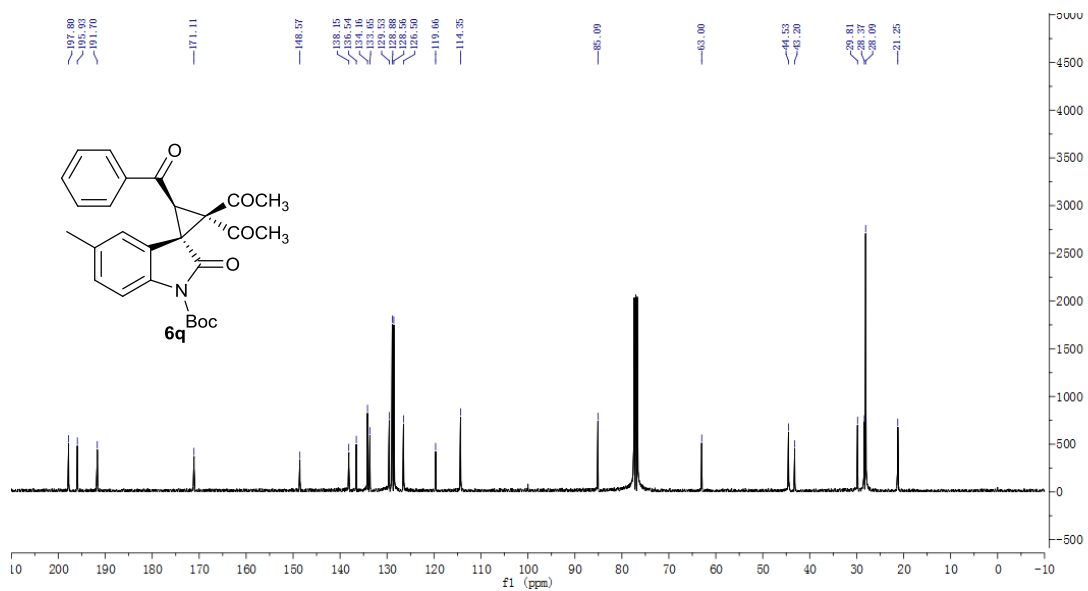

<sup>13</sup>C NMR spectrum of **6q** in CDCl<sub>3</sub>

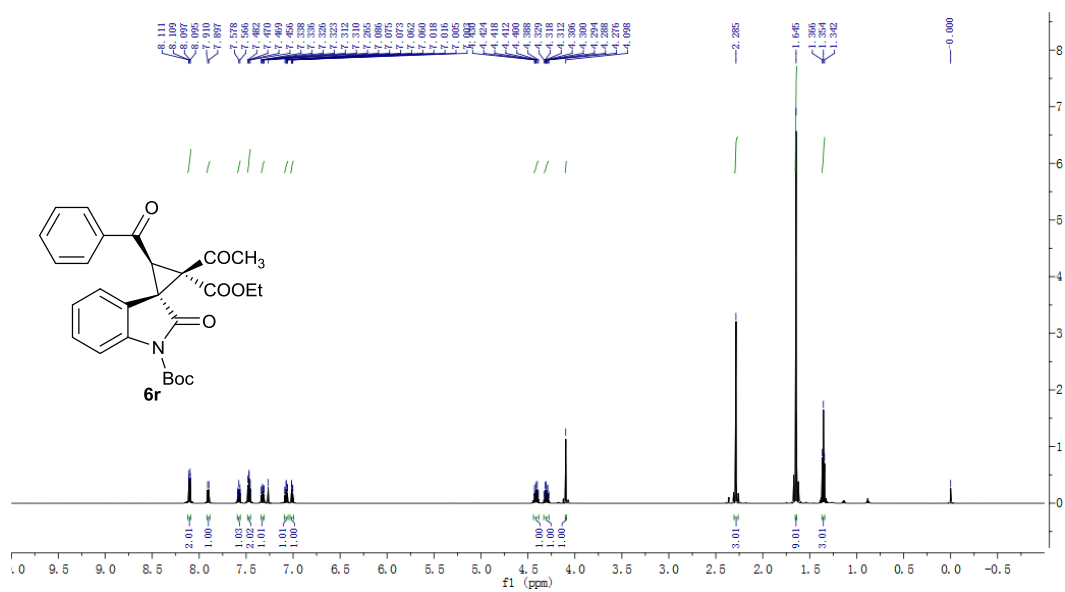

<sup>1</sup>H NMR spectrum of **6r** in CDCl<sub>3</sub> (d.r. = 18:1)

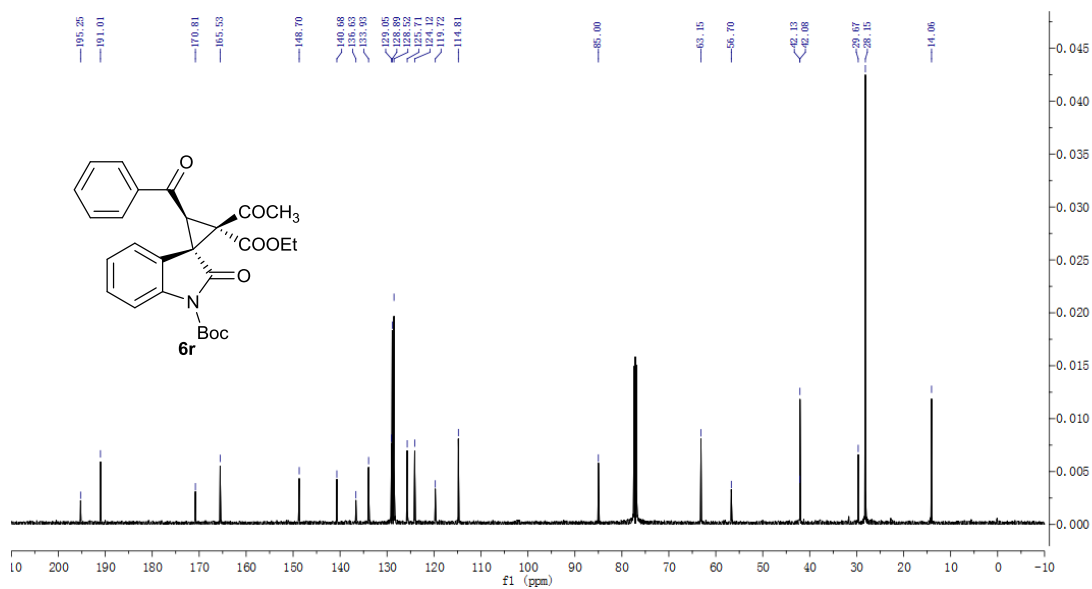

<sup>13</sup>C NMR spectrum of **6r** in CDCl<sub>3</sub>

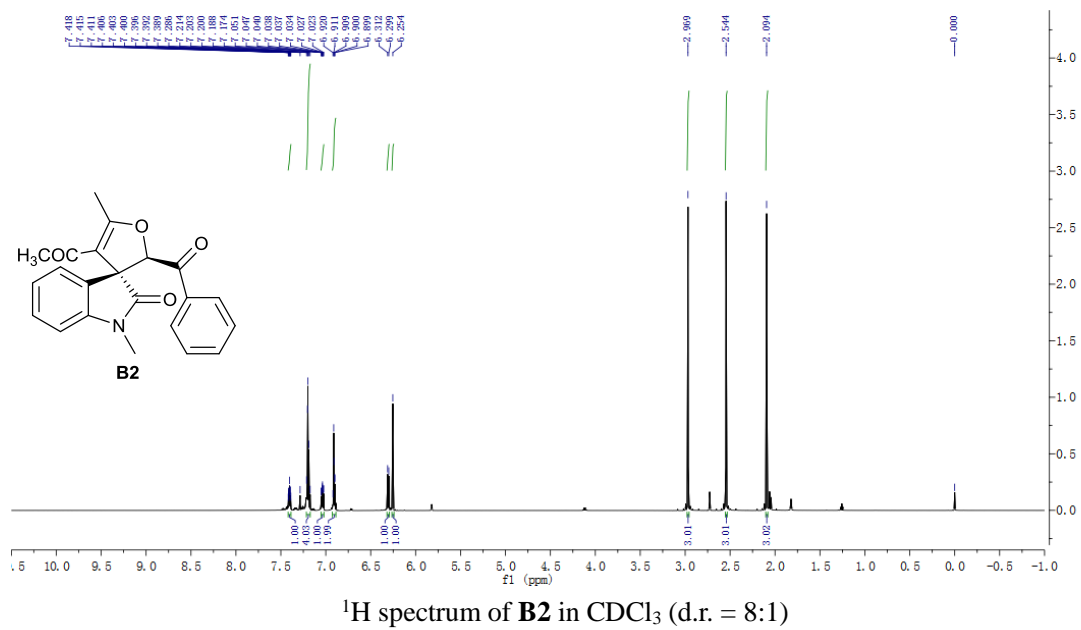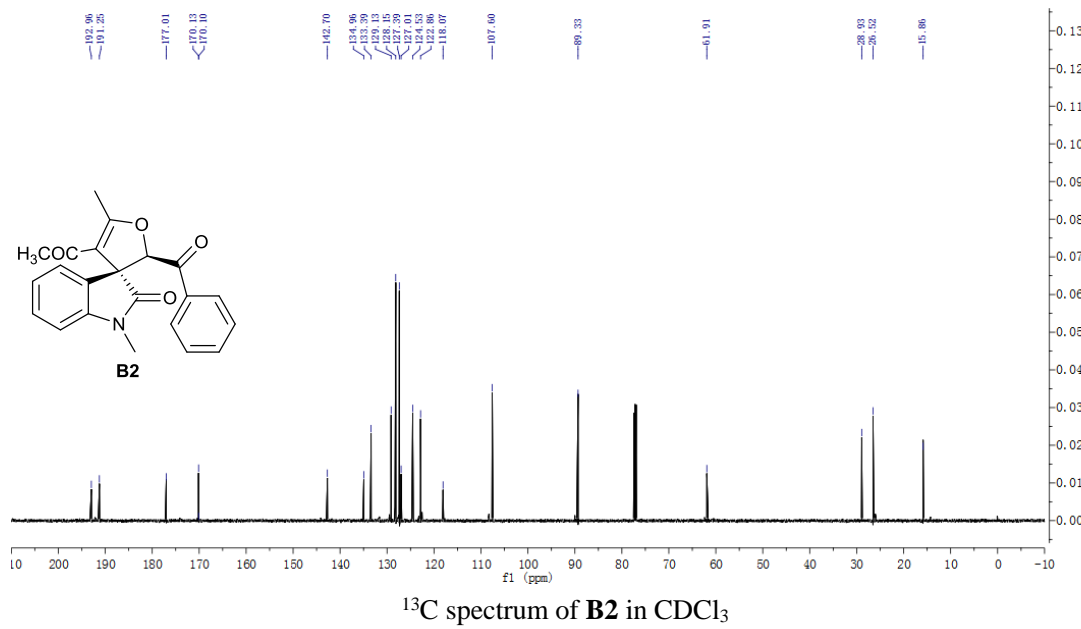

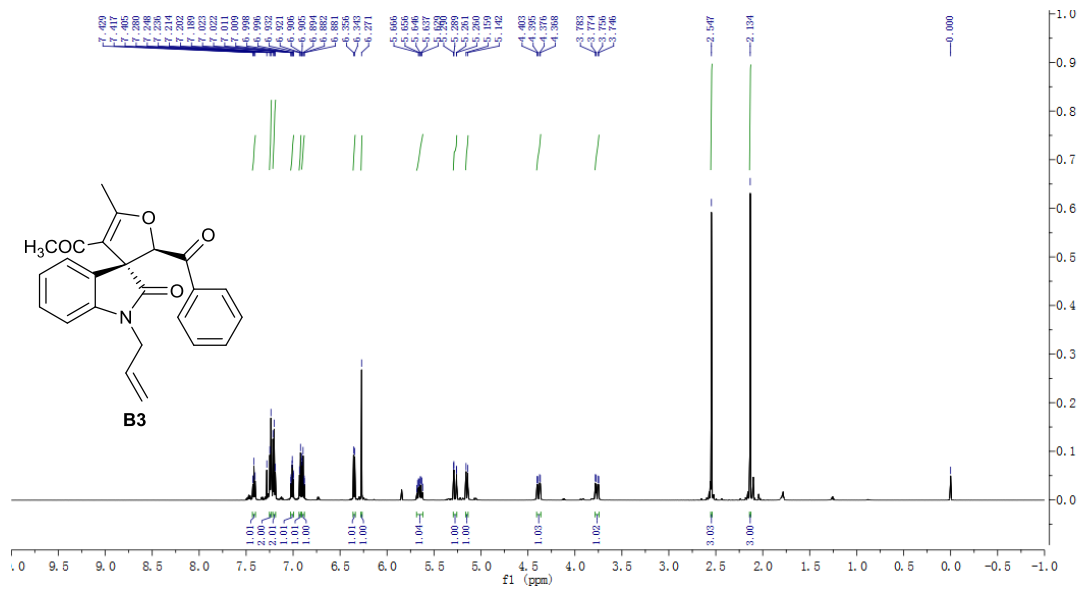

<sup>1</sup>H spectrum of **B3** in CDCl<sub>3</sub> (d.r. =5:1)

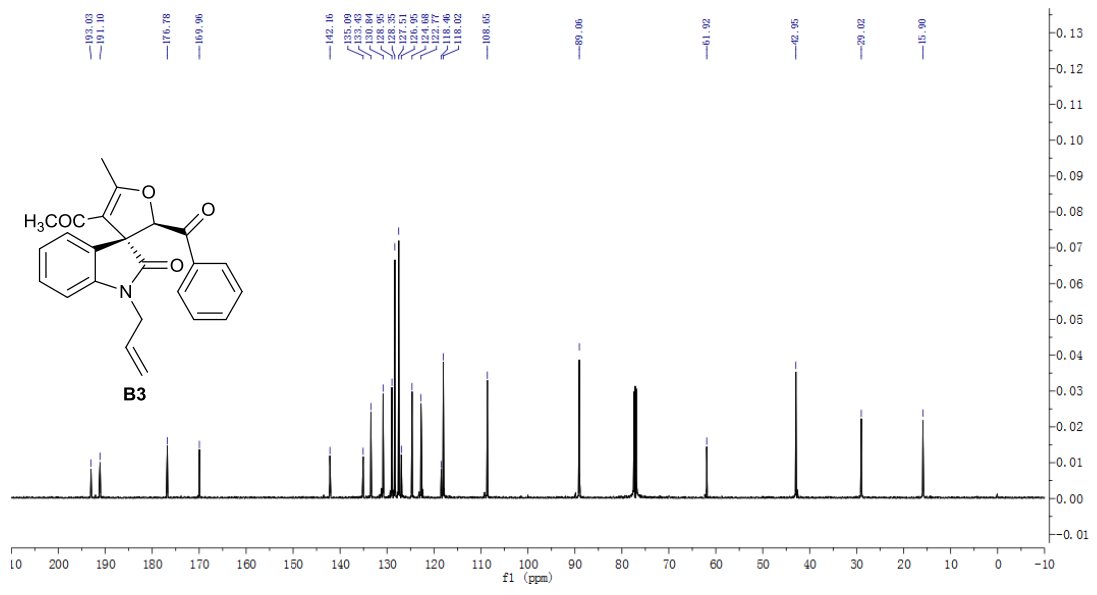

<sup>13</sup>C spectrum of **B3** in CDCl<sub>3</sub>

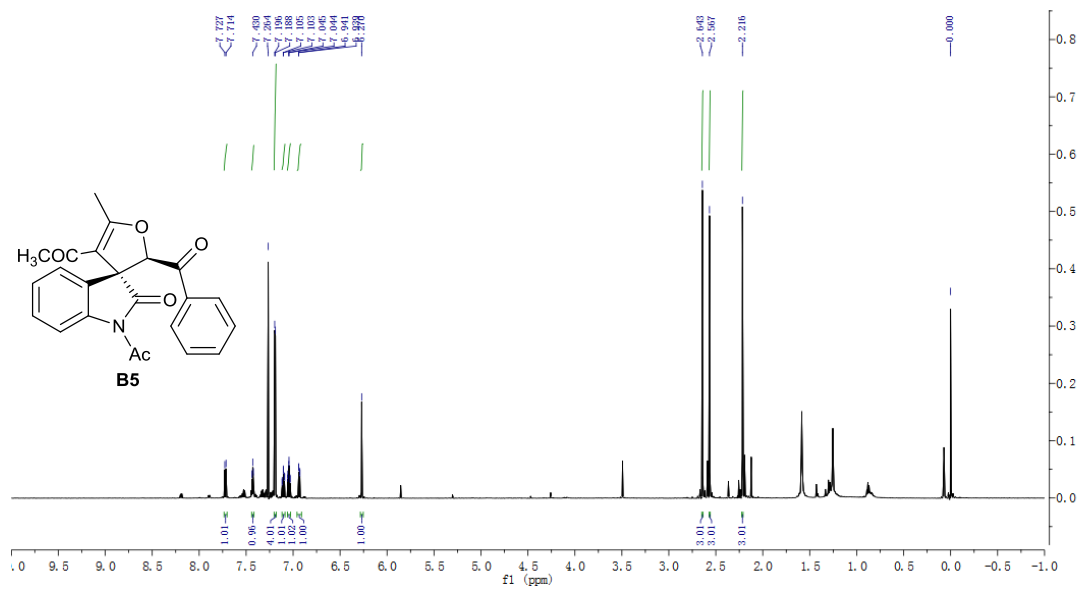

<sup>1</sup>H spectrum of **B5** in CDCl<sub>3</sub> (d.r. =10:1)

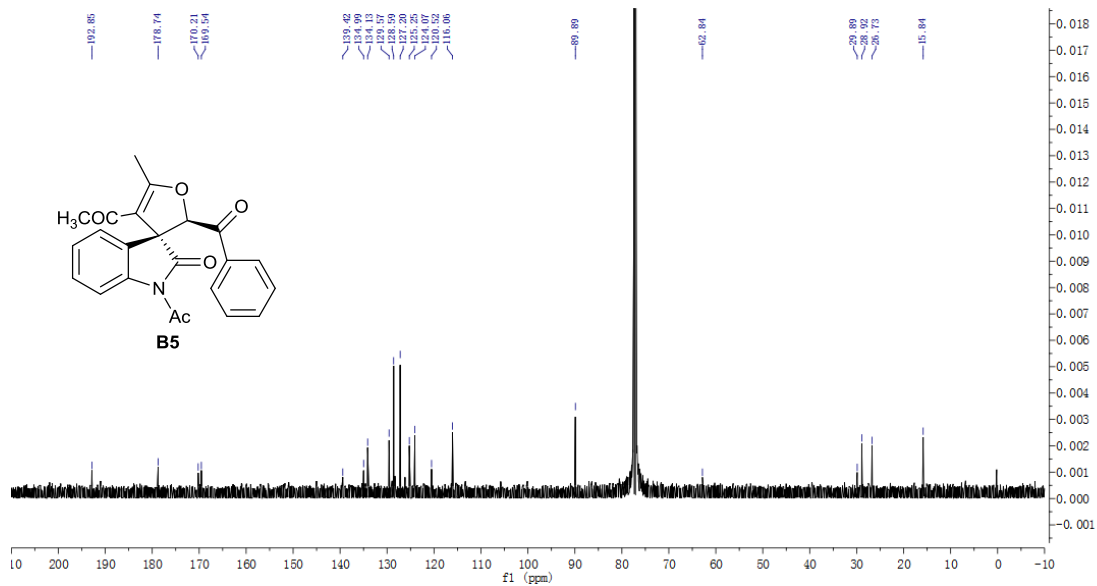

<sup>13</sup>C spectrum of **B5** in CDCl<sub>3</sub>



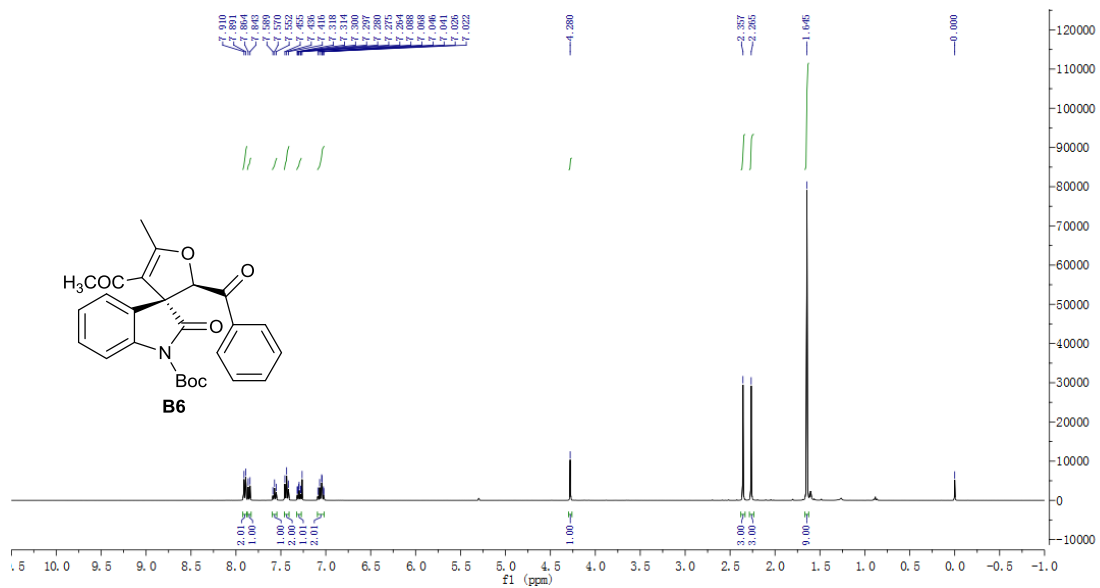

<sup>1</sup>H spectrum of **B6** in CDCl<sub>3</sub> (d.r. =12:1)

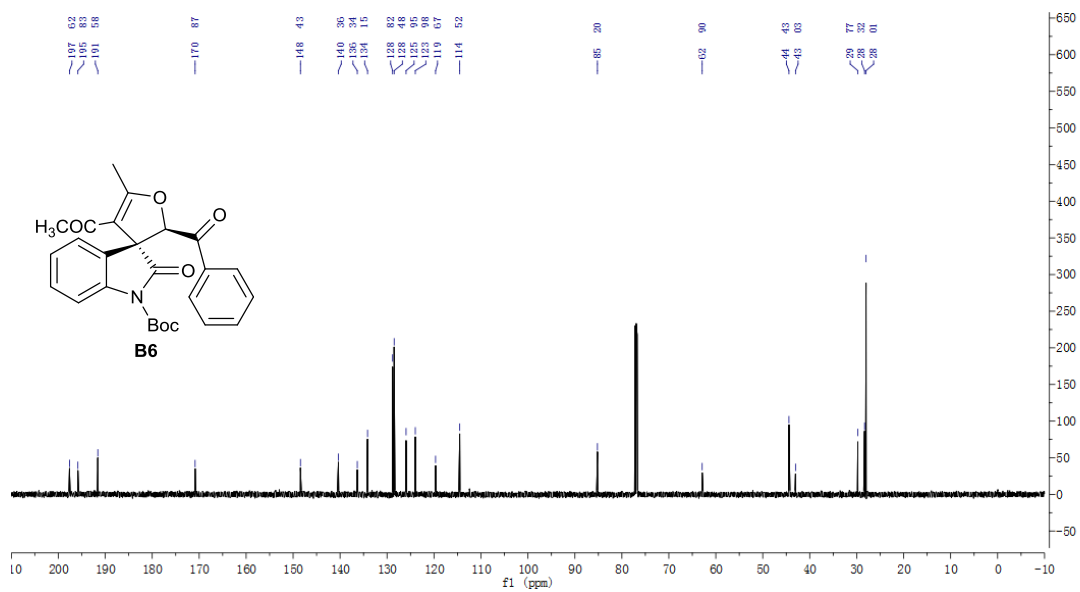

<sup>13</sup>C spectrum of **B6** in CDCl<sub>3</sub>

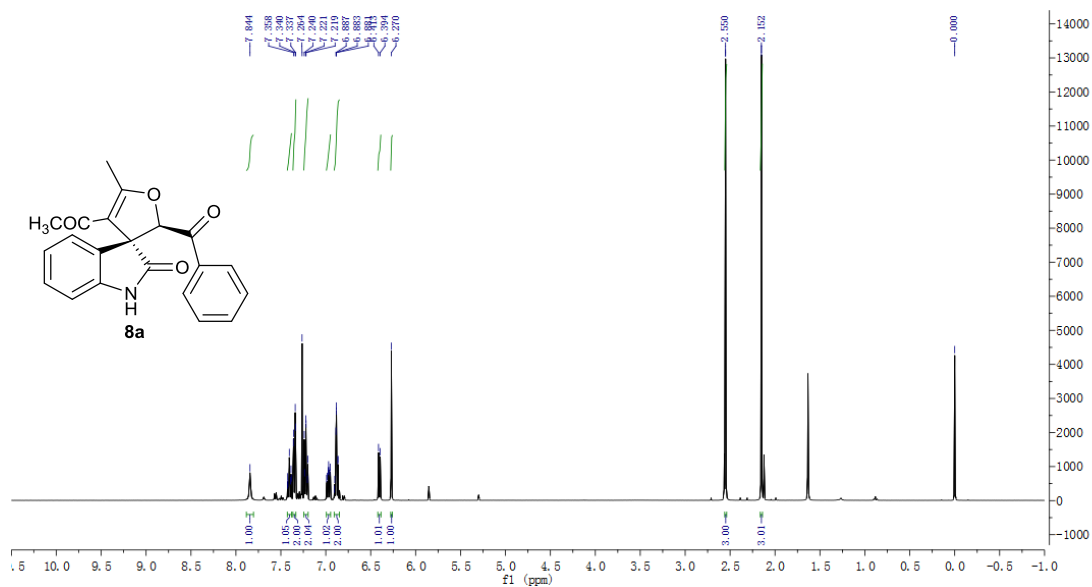

$^1\text{H}$  NMR spectrum of **8a** in  $\text{CDCl}_3$  (d.r. =10:1)

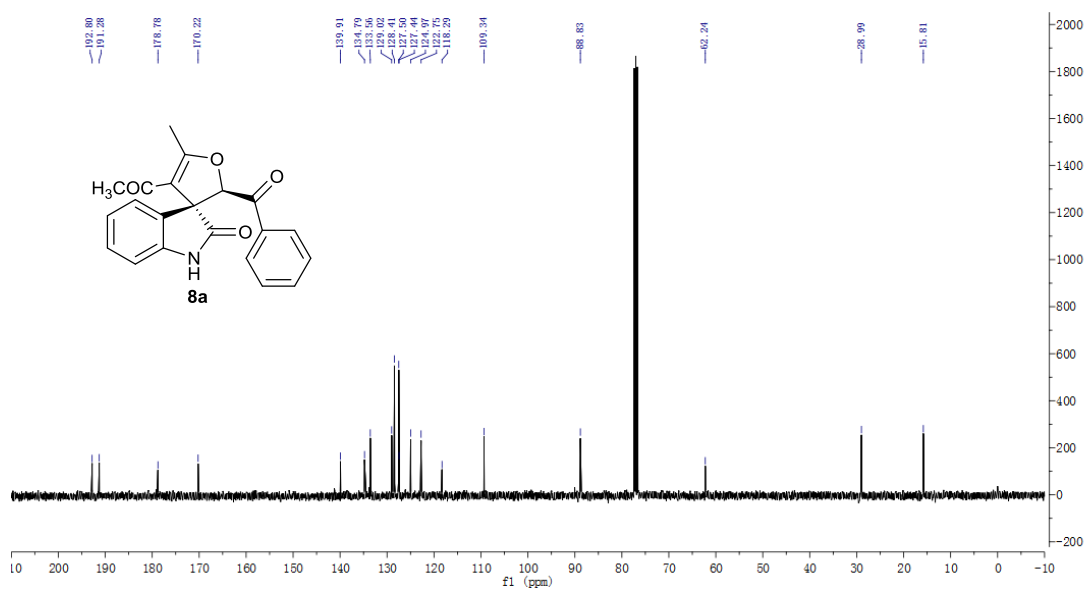

$^{13}\text{C}$  NMR spectrum of **8a** in  $\text{CDCl}_3$

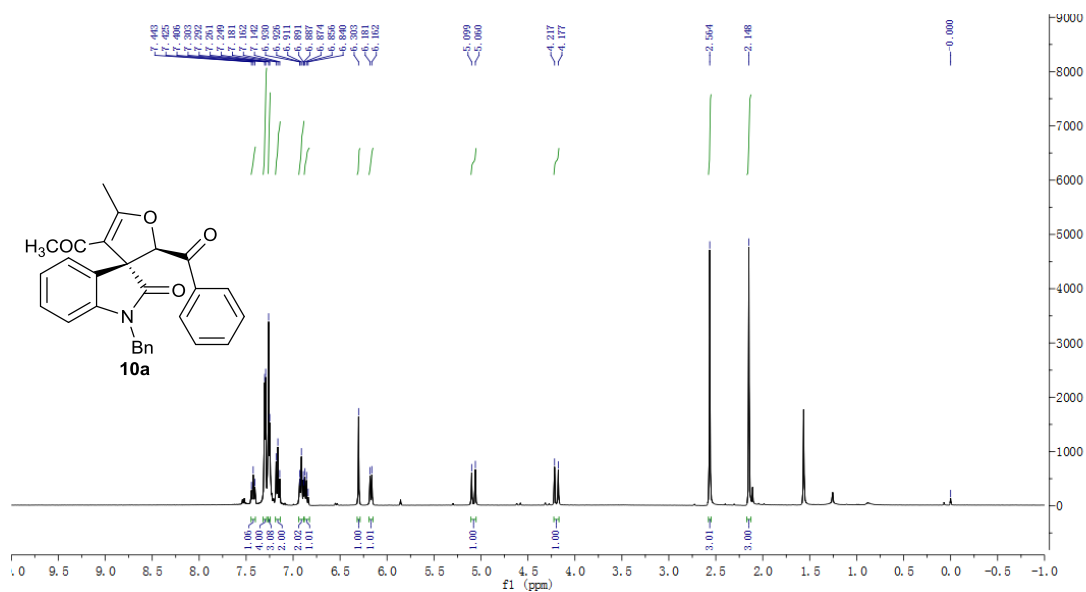

<sup>1</sup>H NMR spectrum of **10a** in CDCl<sub>3</sub> (d.r. = 10:1)

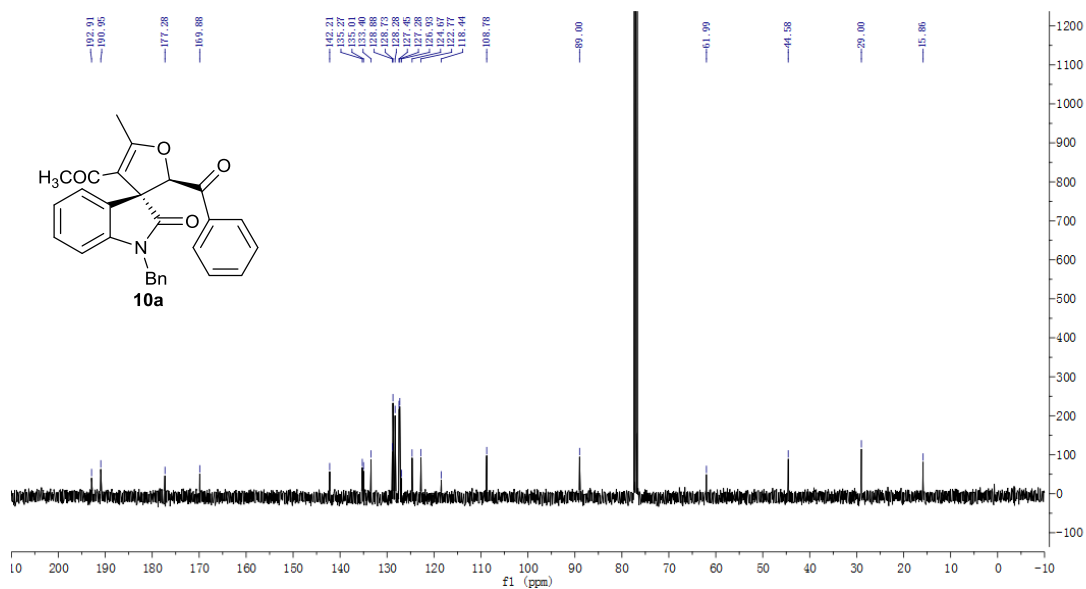

<sup>13</sup>C NMR spectrum of **10a** in CDCl<sub>3</sub>

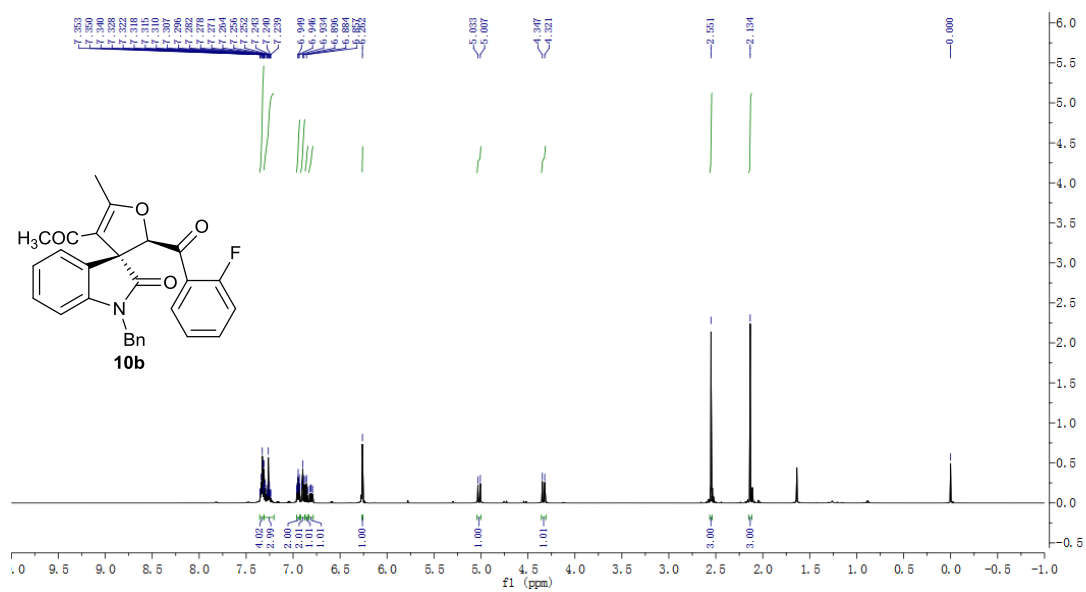

<sup>1</sup>H NMR spectrum of **10b** in CDCl<sub>3</sub> (d.r. = 16:1)

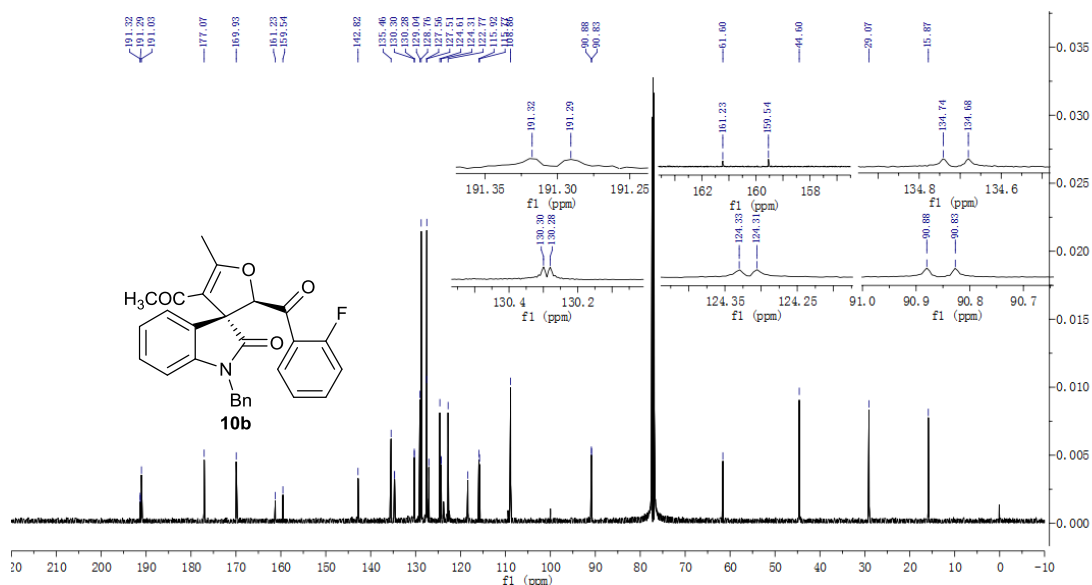

<sup>13</sup>C NMR spectrum of **10b** in CDCl<sub>3</sub>

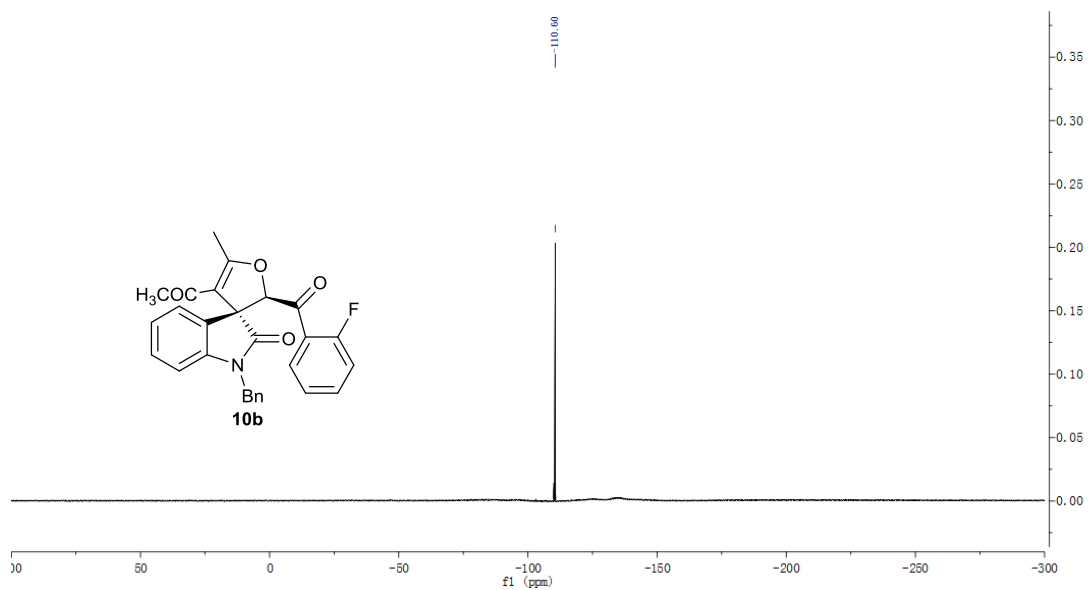

$^{19}\text{F}$  NMR spectrum of **10b** in  $\text{CDCl}_3$

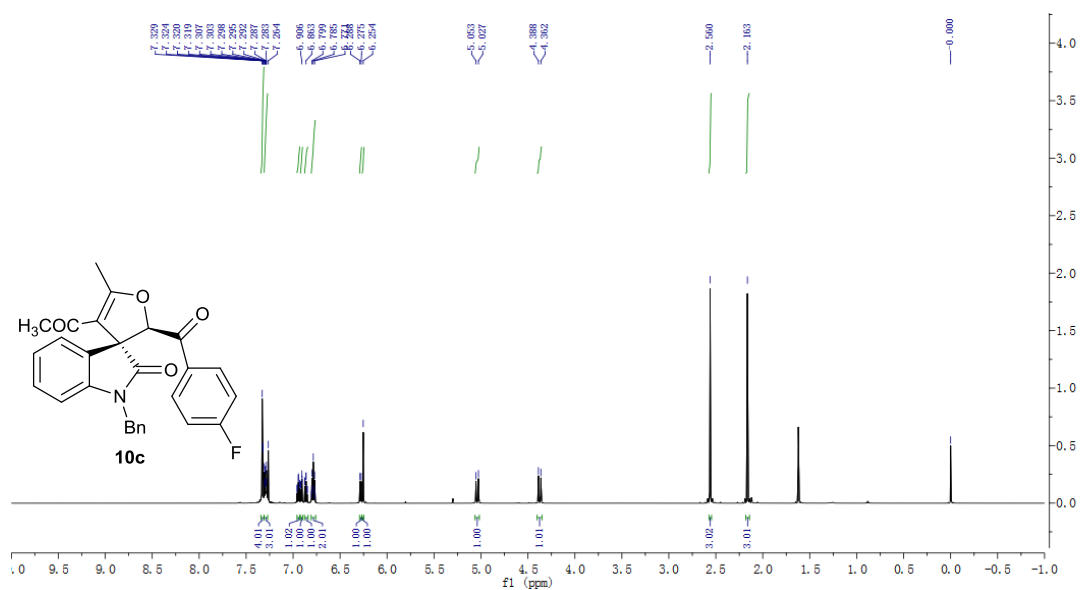

**<sup>1</sup>H NMR spectrum of 10c in CDCl<sub>3</sub> (d.r. = 16:1)**

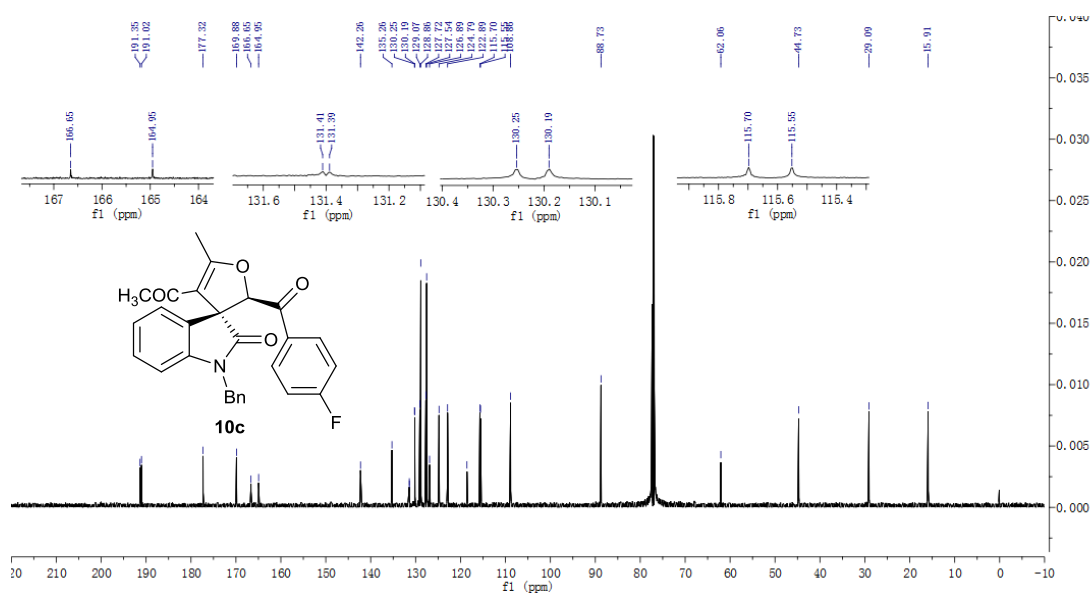

**<sup>13</sup>C NMR spectrum of 10c in CDCl<sub>3</sub>**

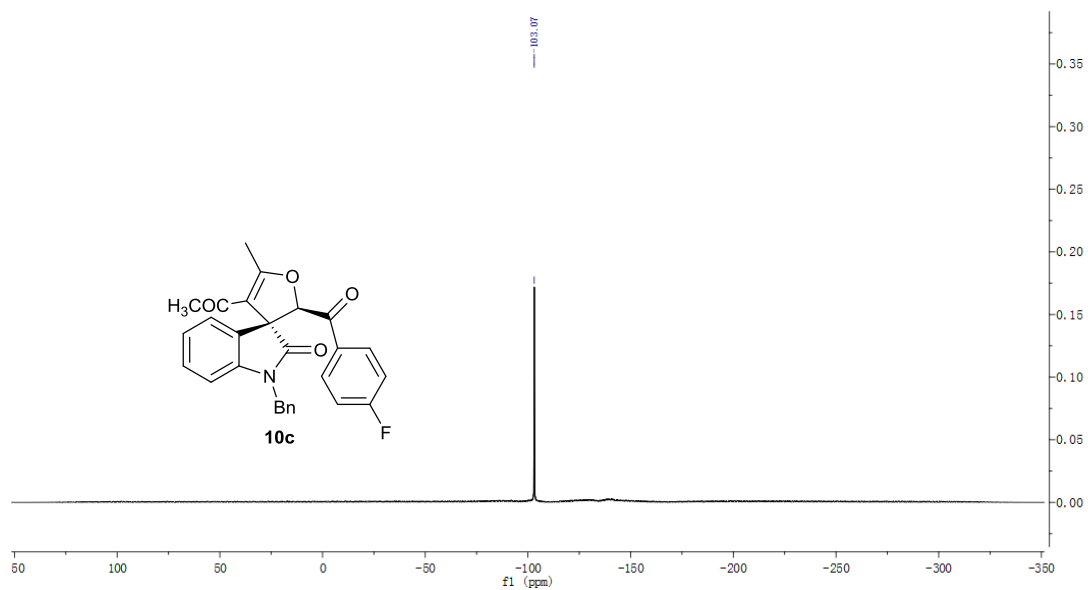

$^{19}\text{F}$  NMR spectrum of **10c** in  $\text{CDCl}_3$





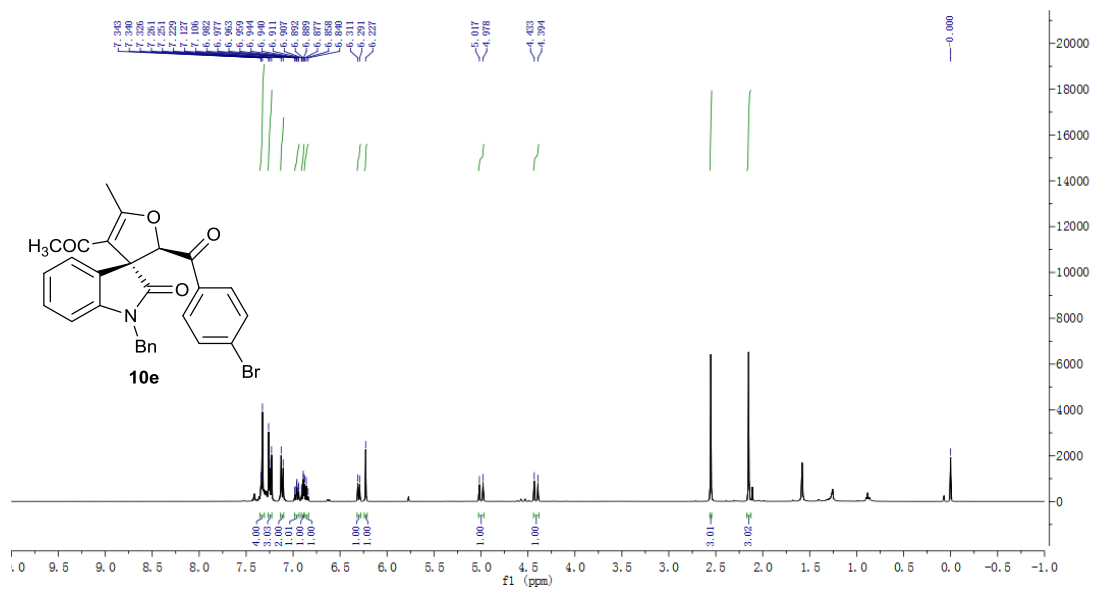

**<sup>1</sup>H NMR spectrum of 10e in CDCl<sub>3</sub> (d.r. = 10:1)**

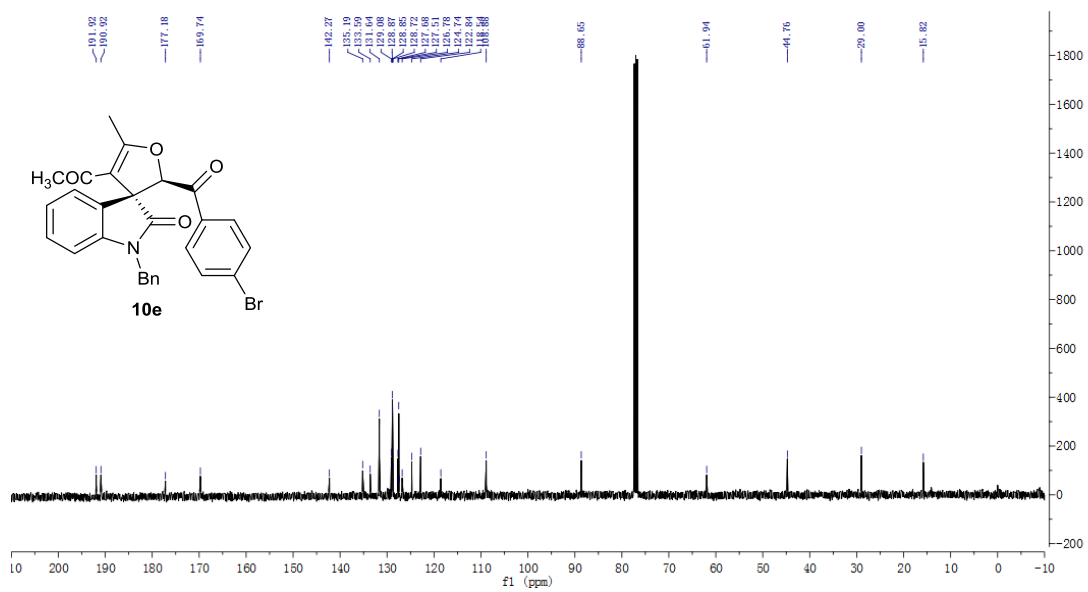

**<sup>13</sup>C NMR spectrum of 10e in CDCl<sub>3</sub>**

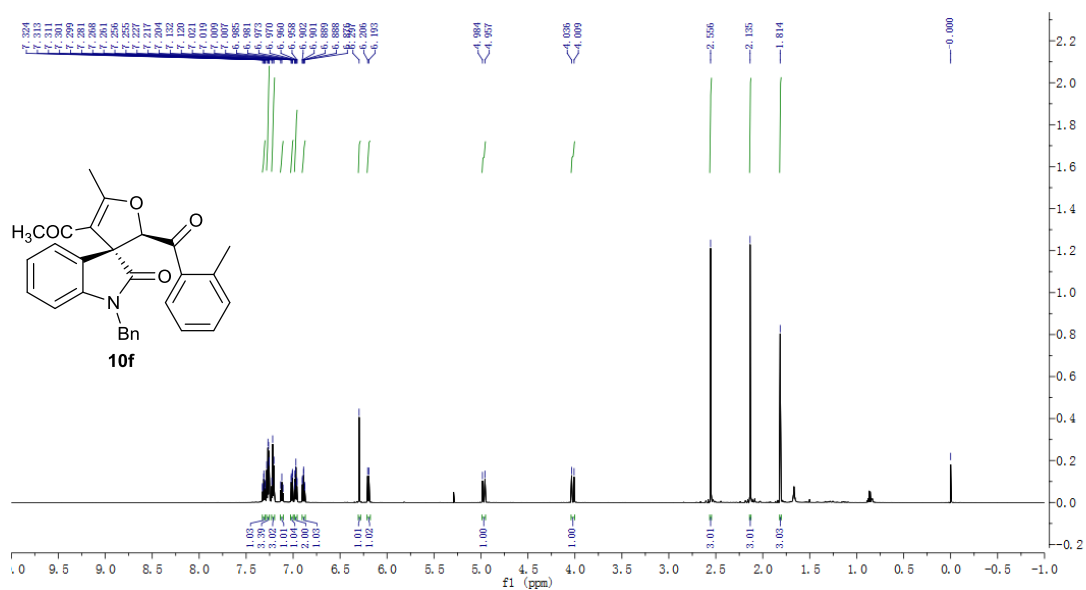

<sup>1</sup>H NMR spectrum of 10f in CDCl<sub>3</sub> (d.r. = 20:1)

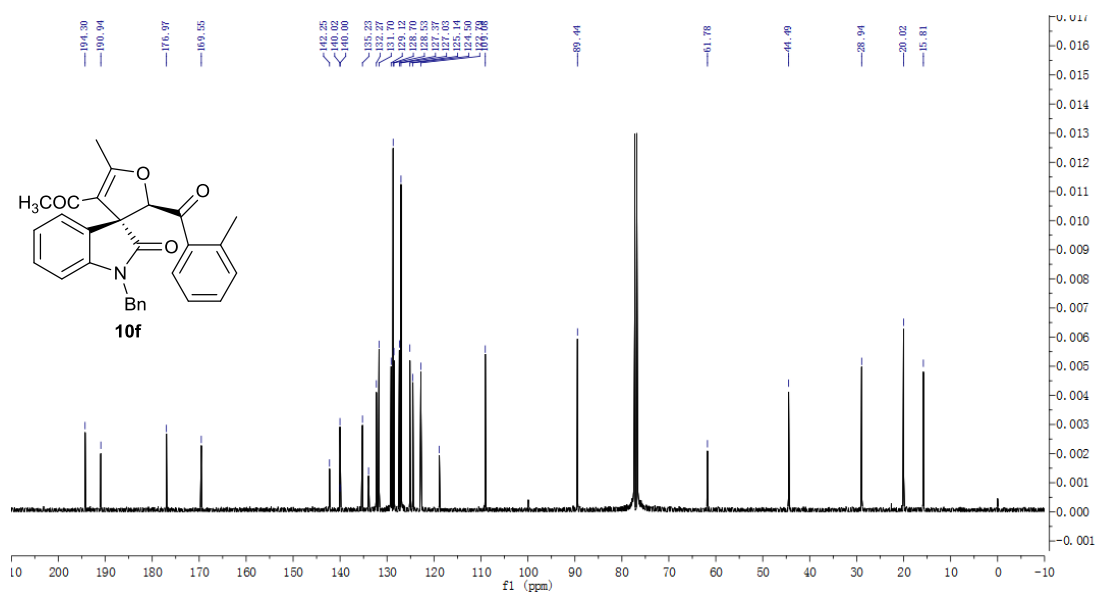

<sup>13</sup>C NMR spectrum of 10f in CDCl<sub>3</sub>

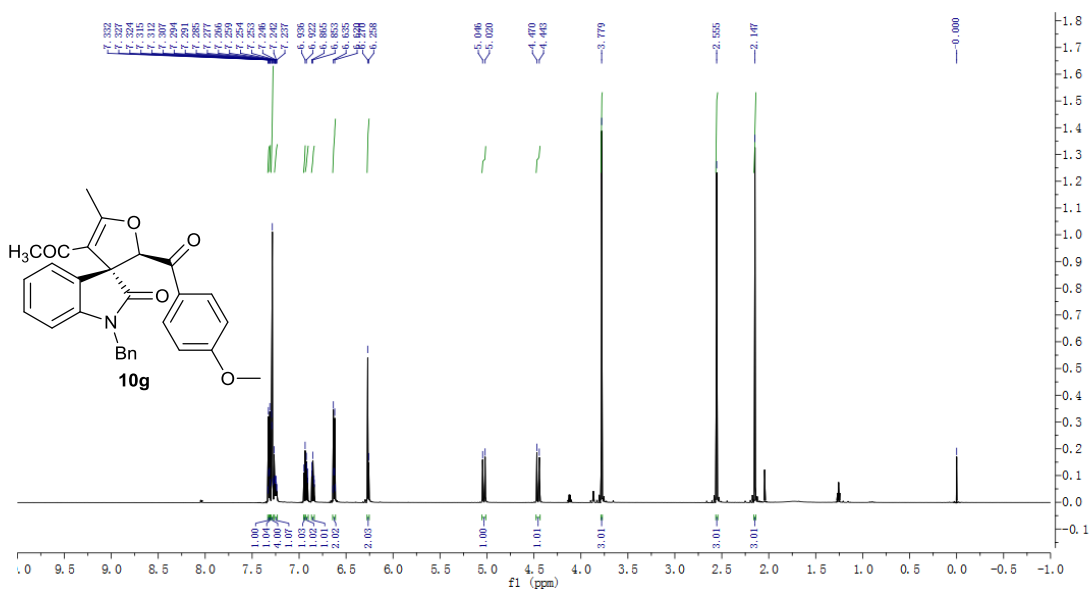

<sup>1</sup>H NMR spectrum of **10g** in CDCl<sub>3</sub> (d.r. = 18:1)

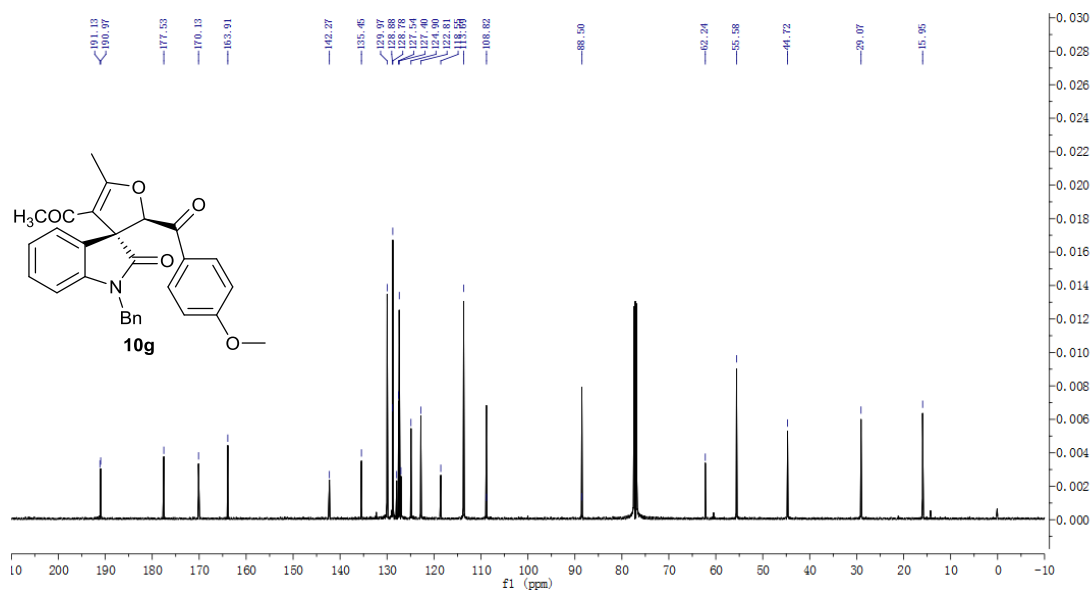

<sup>13</sup>C NMR spectrum of **10g** in CDCl<sub>3</sub>

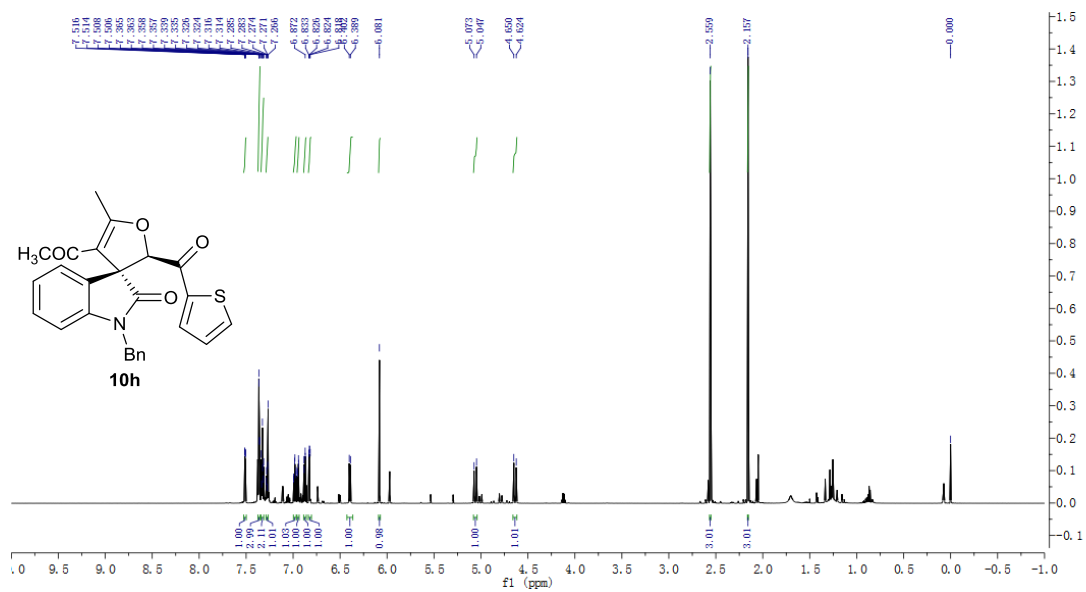

<sup>1</sup>H NMR spectrum of **10h** in CDCl<sub>3</sub> (d.r. = 5:1)

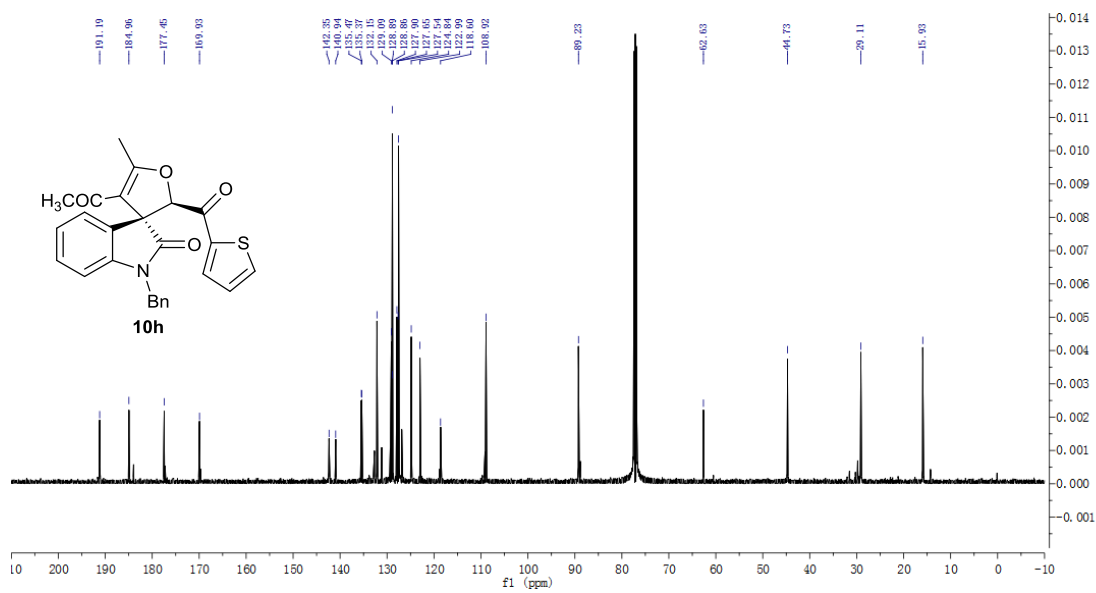

<sup>13</sup>C NMR spectrum of **10h** in CDCl<sub>3</sub>

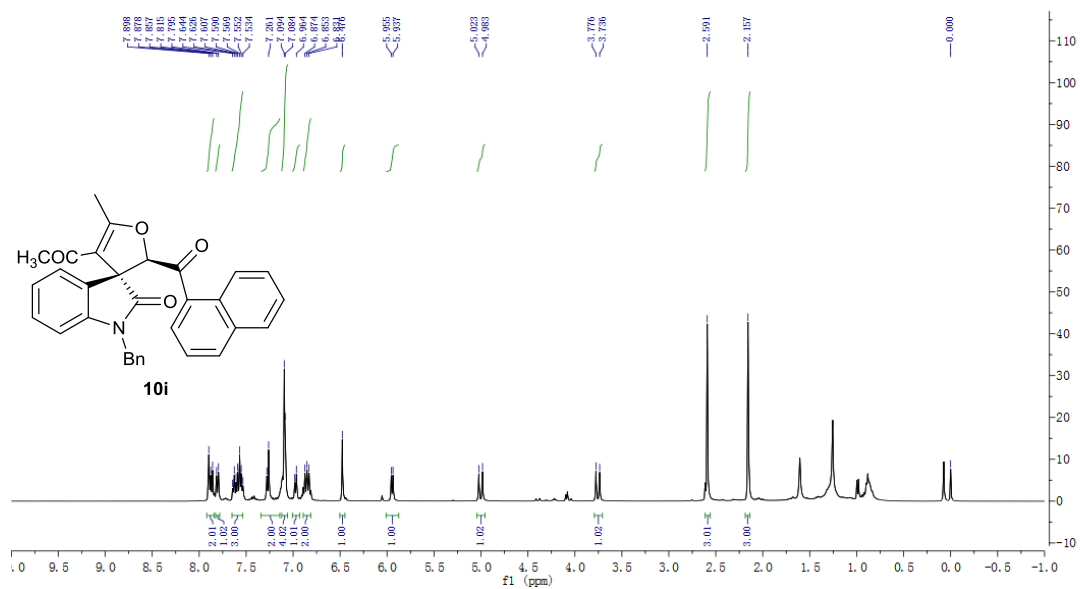

<sup>1</sup>H NMR spectrum of **10i** in CDCl<sub>3</sub> (d.r. = 5:1)

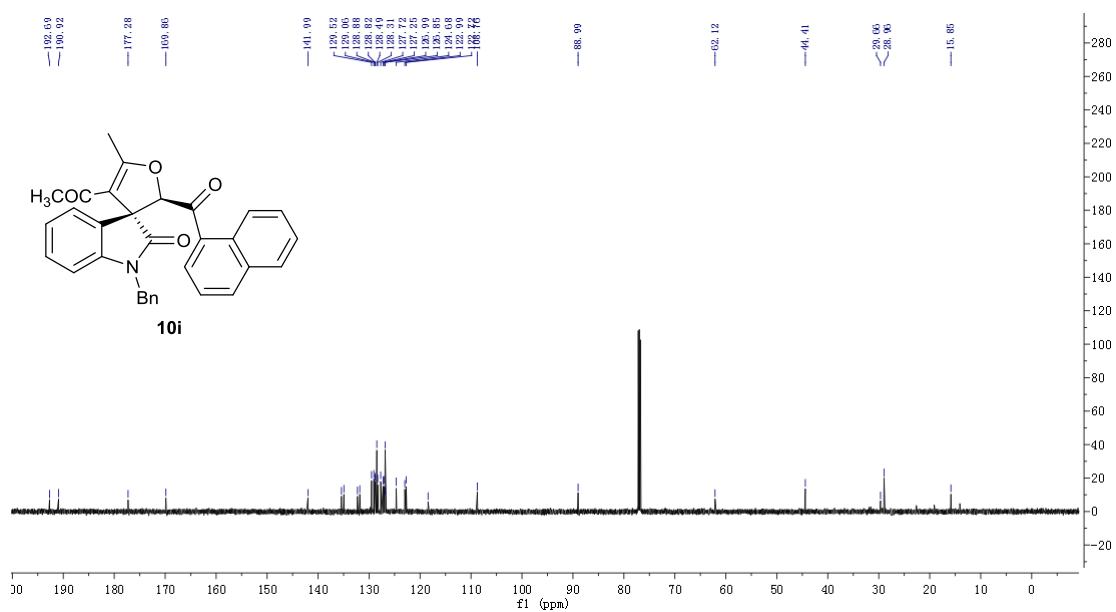

<sup>13</sup>C NMR spectrum of **10i** in CDCl<sub>3</sub>

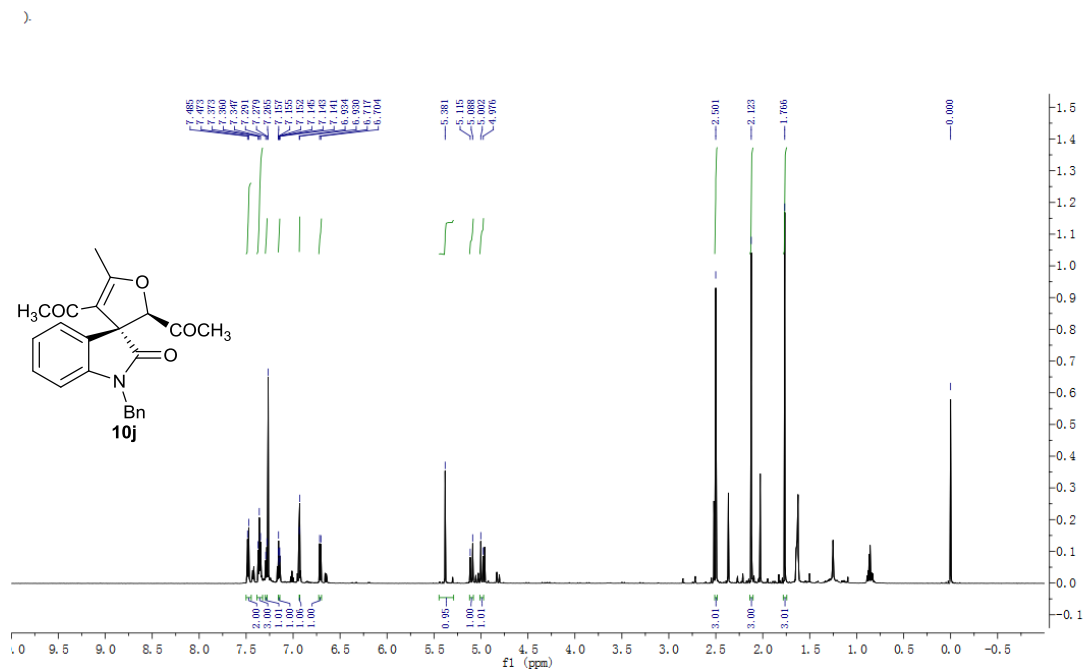

<sup>1</sup>H NMR spectrum of **10j** in CDCl<sub>3</sub> (d.r. = 6:1)

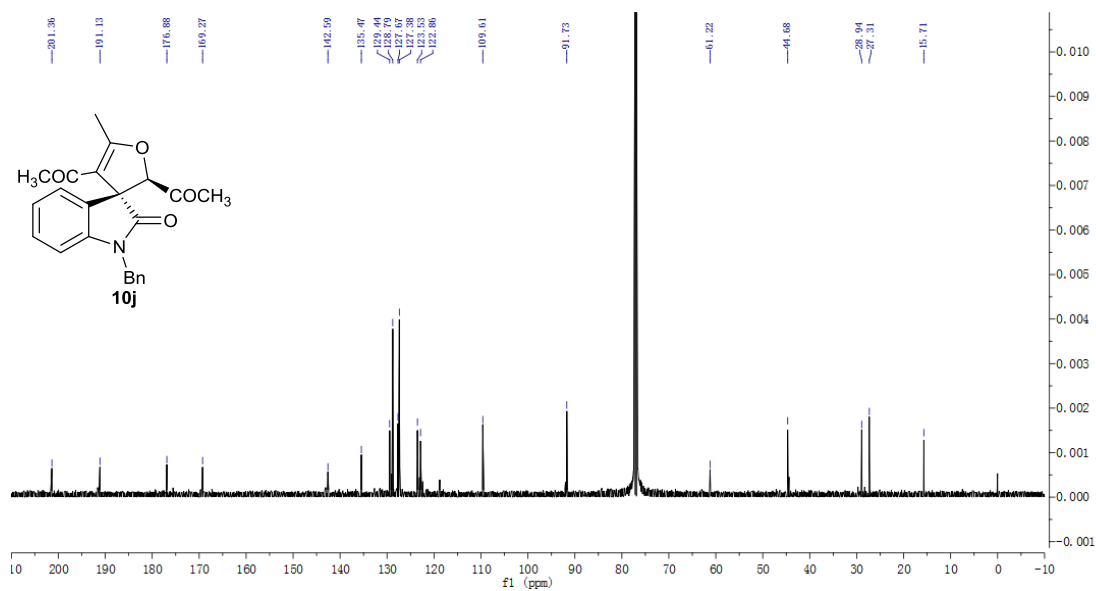

<sup>13</sup>C NMR spectrum of **10j** in CDCl<sub>3</sub>

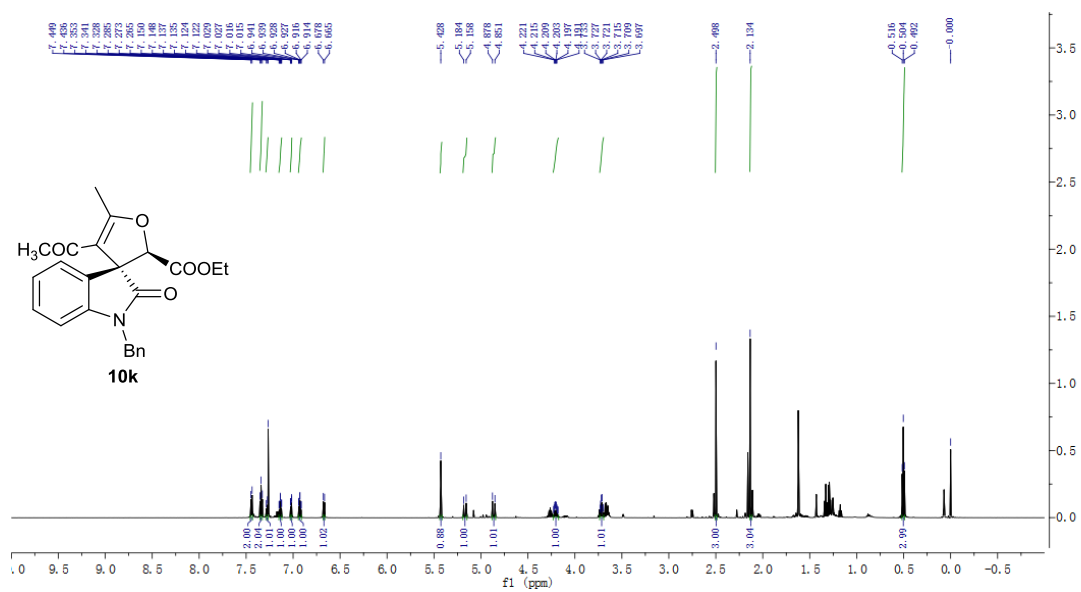

<sup>1</sup>H NMR spectrum of **10k** in CDCl<sub>3</sub> (d.r. = 5:1)

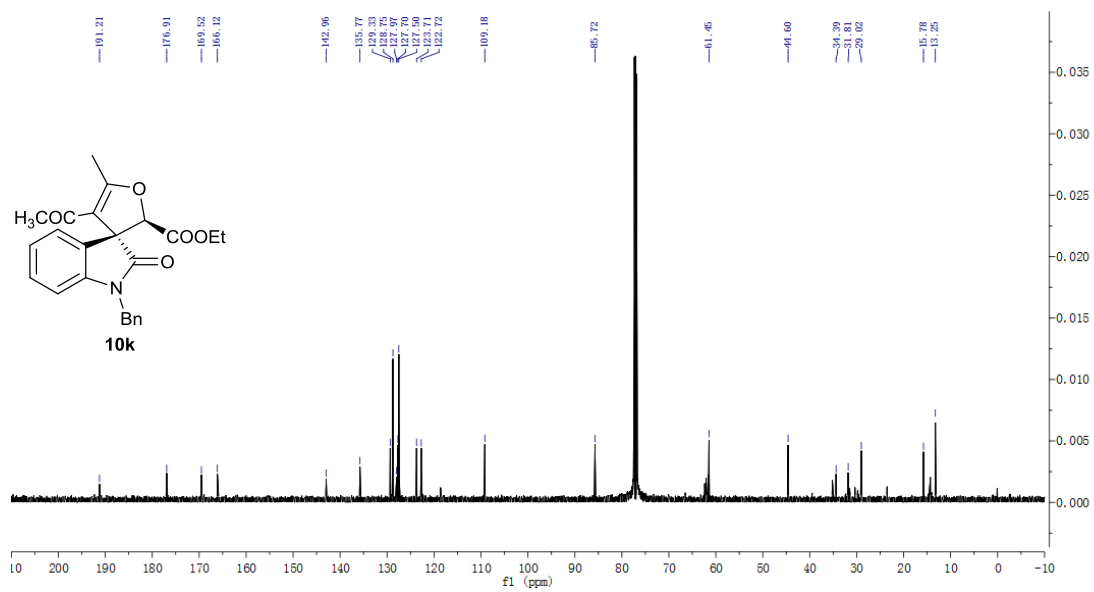

<sup>13</sup>C NMR spectrum of **10k** in CDCl<sub>3</sub>

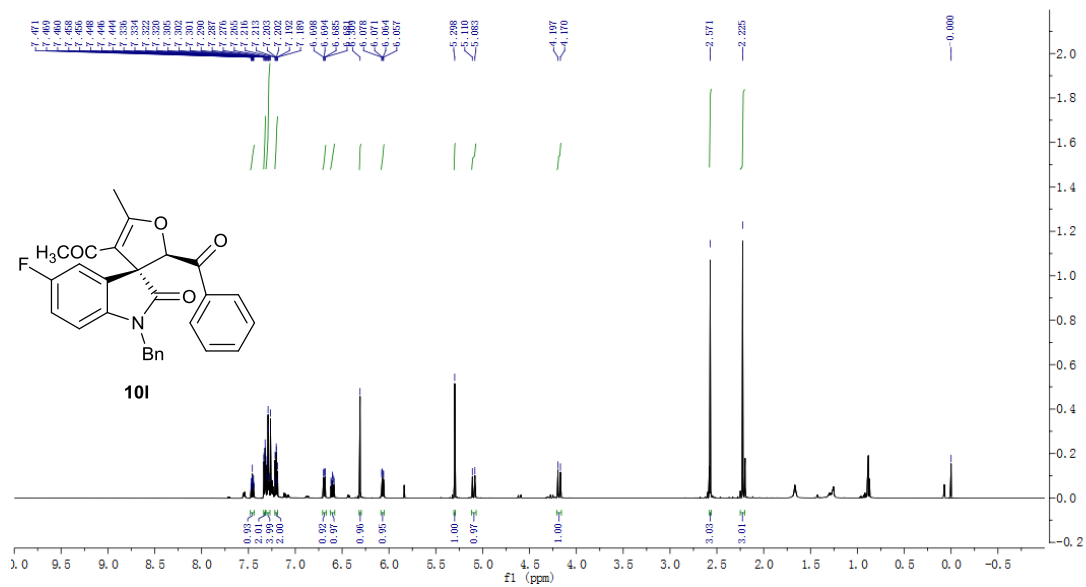

<sup>1</sup>H NMR spectrum of **101** in CDCl<sub>3</sub> (d.r. = 10:1)

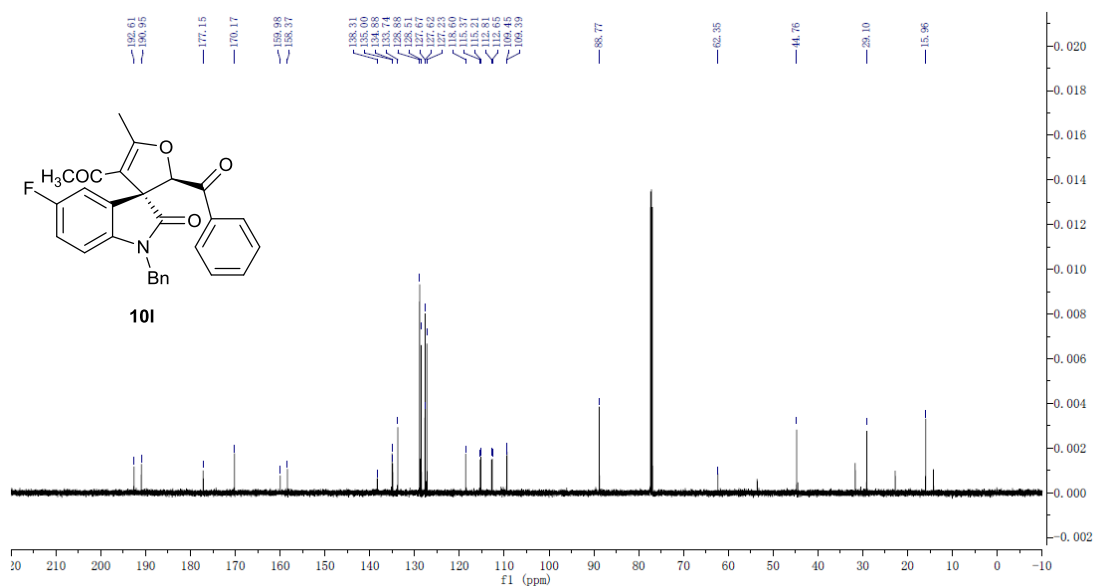

<sup>13</sup>C NMR spectrum of **101** in CDCl<sub>3</sub>



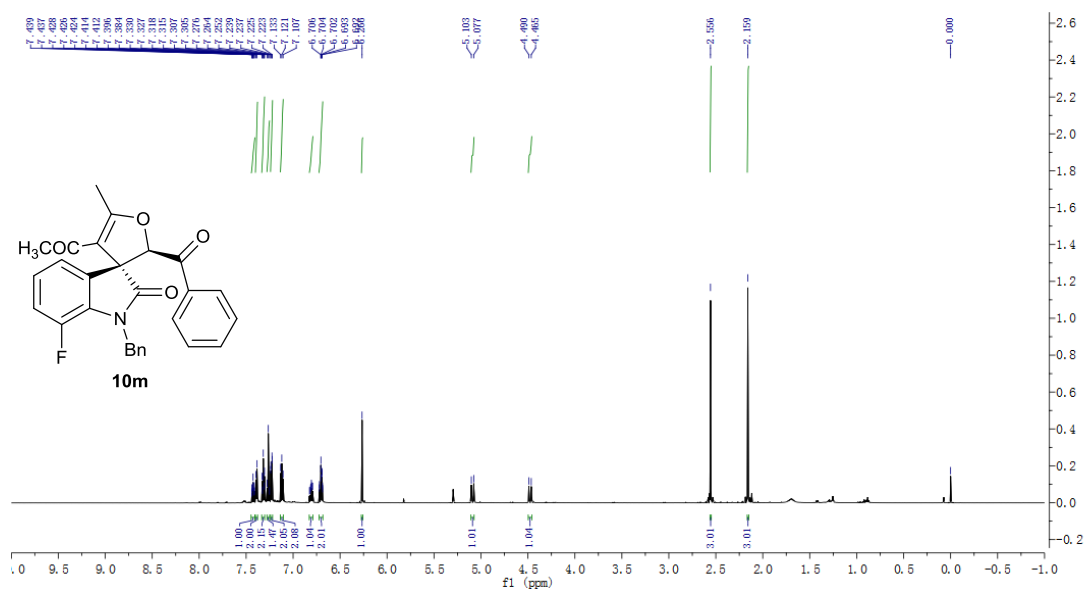

**<sup>1</sup>H NMR spectrum of 10m in CDCl<sub>3</sub> (d.r. = 16:1)**

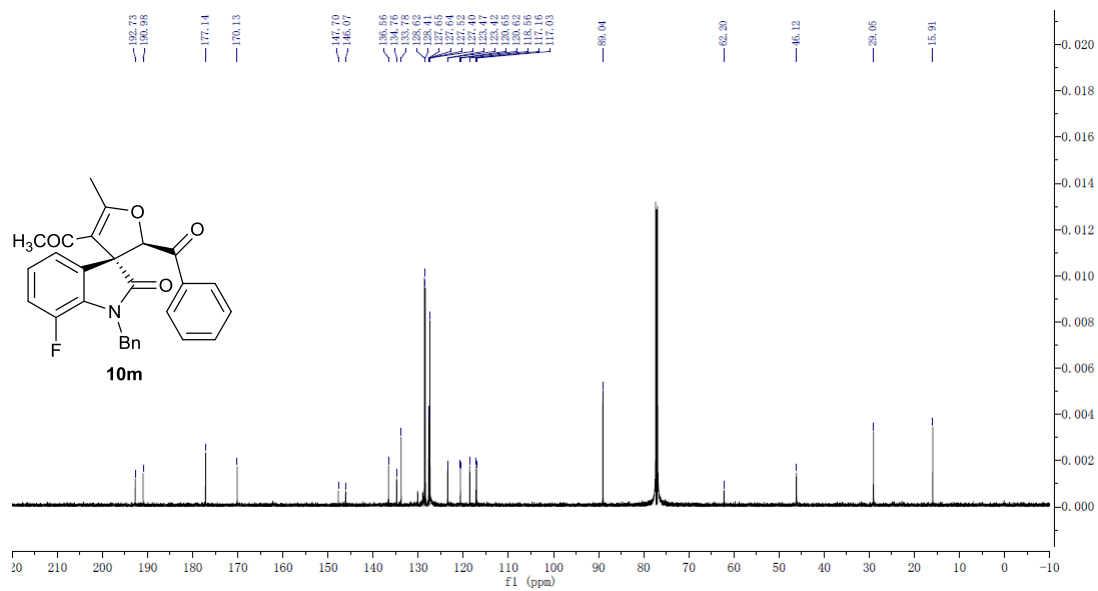

**<sup>13</sup>C NMR spectrum of 10m in CDCl<sub>3</sub>**

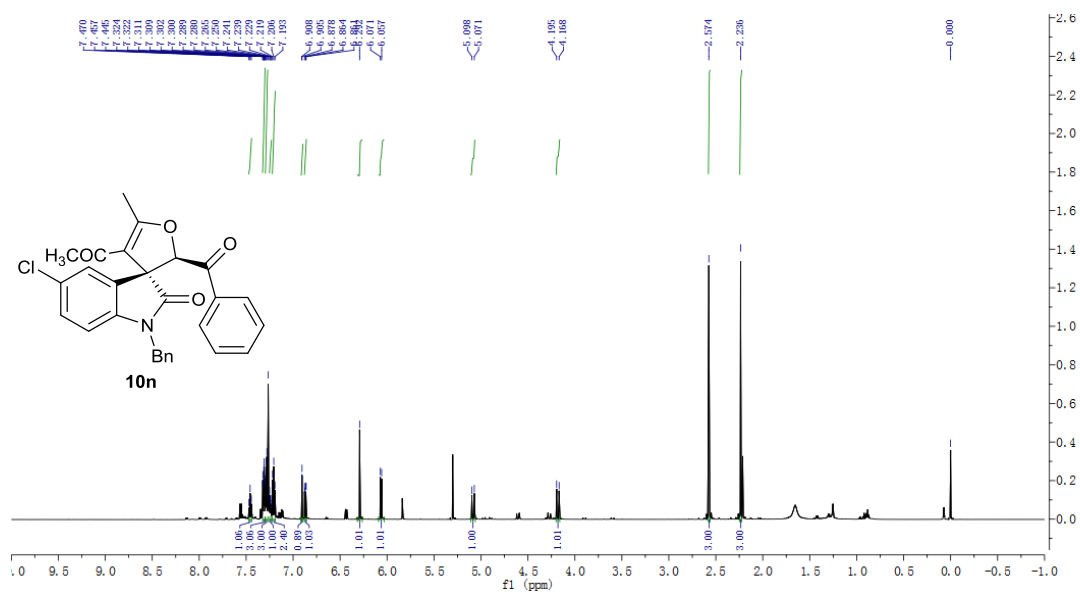

<sup>1</sup>H NMR spectrum of **10n** in CDCl<sub>3</sub> (d.r. = 5:1)

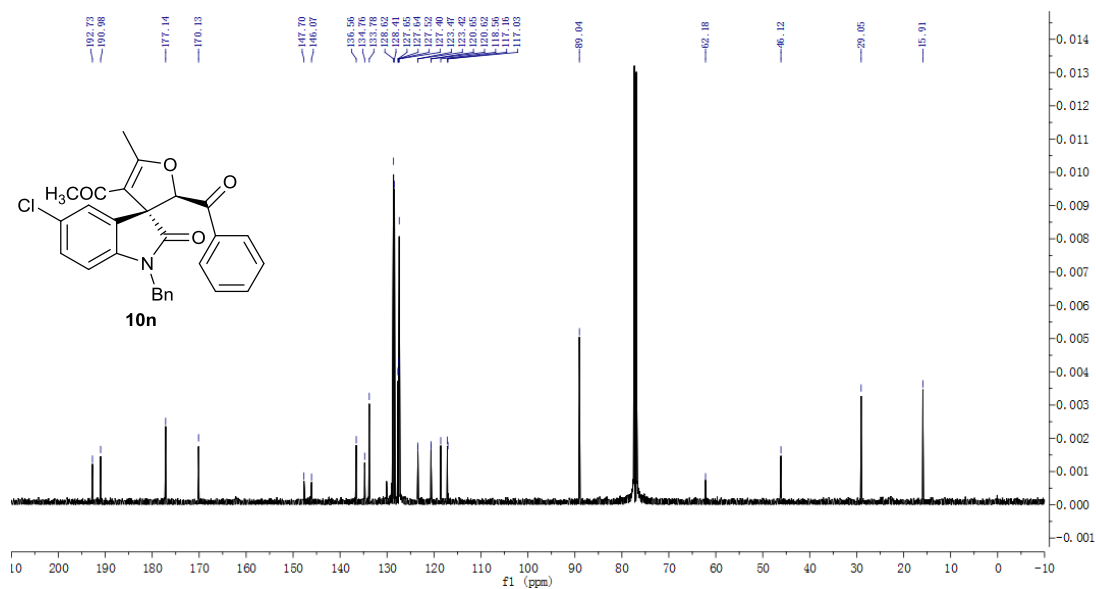

<sup>13</sup>C NMR spectrum of **10n** in CDCl<sub>3</sub>

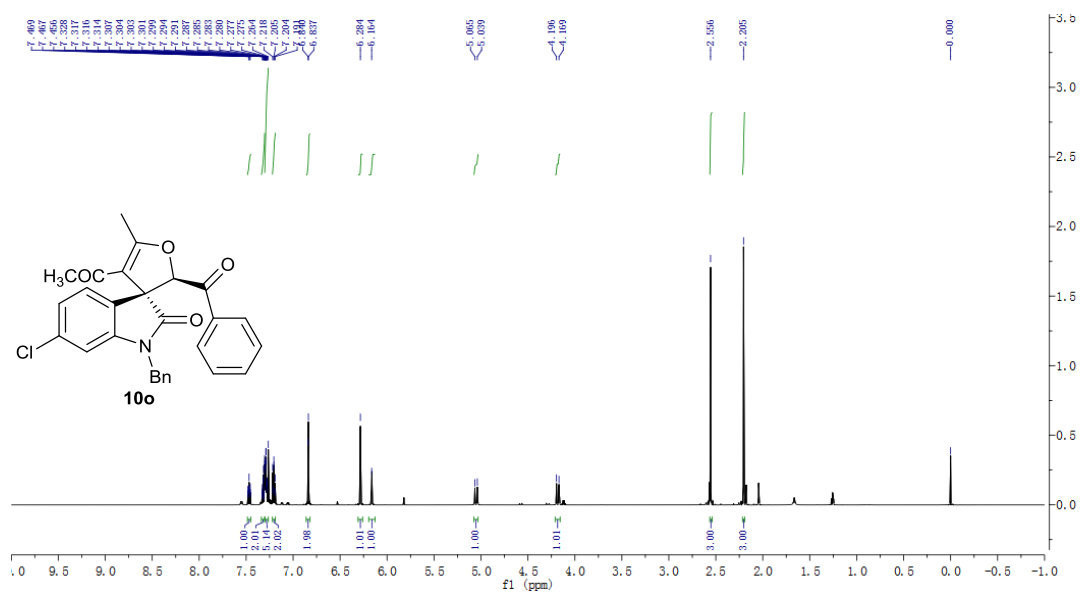

<sup>1</sup>H NMR spectrum of **10o** in CDCl<sub>3</sub> (d.r. = 15:1)

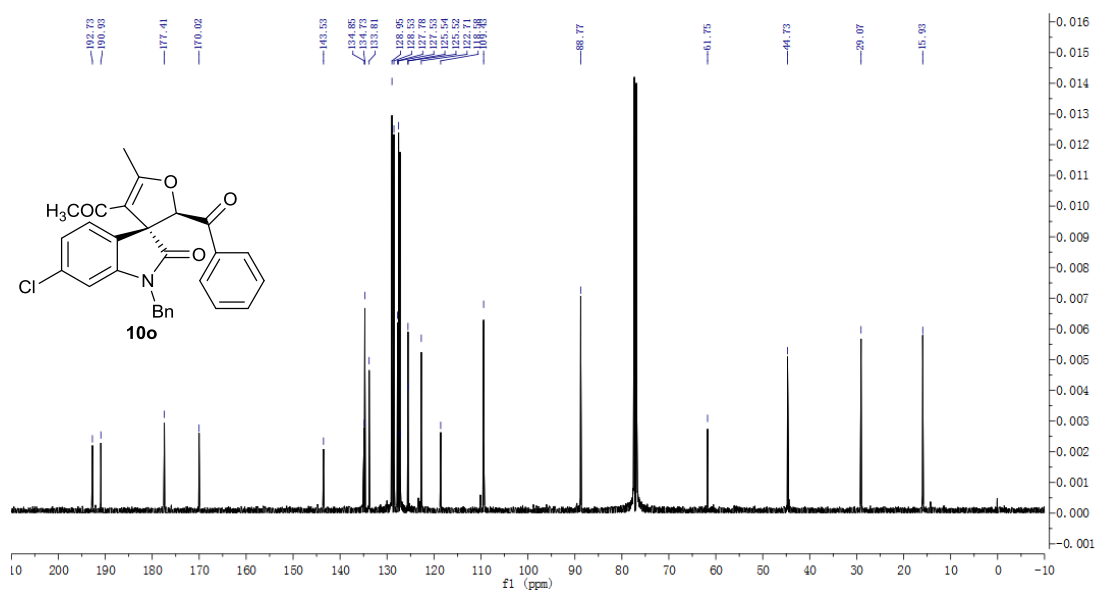

<sup>13</sup>C NMR spectrum of **10o** in CDCl<sub>3</sub>

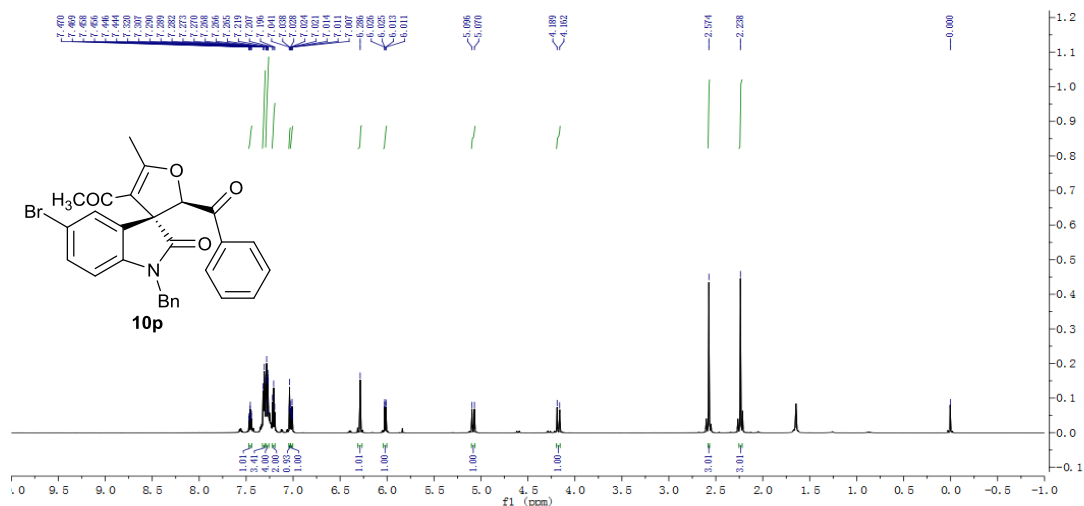

<sup>1</sup>H NMR spectrum of **10p** in CDCl<sub>3</sub> (d.r. = 13:1)

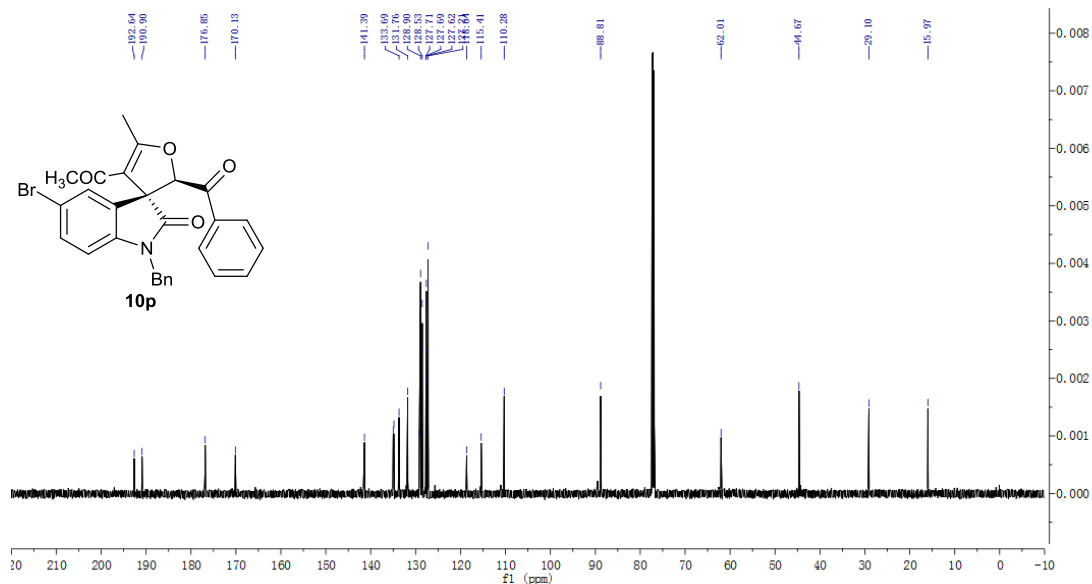

<sup>13</sup>C NMR spectrum of **10p** in CDCl<sub>3</sub>

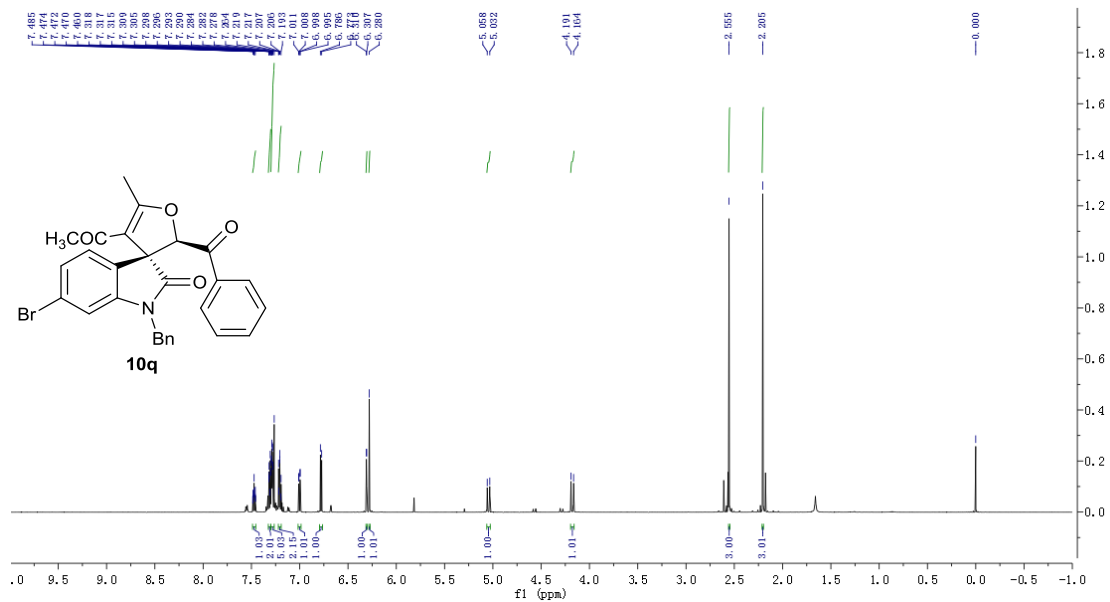

<sup>1</sup>H NMR spectrum of **10q** in CDCl<sub>3</sub> (d.r. = 10:1)

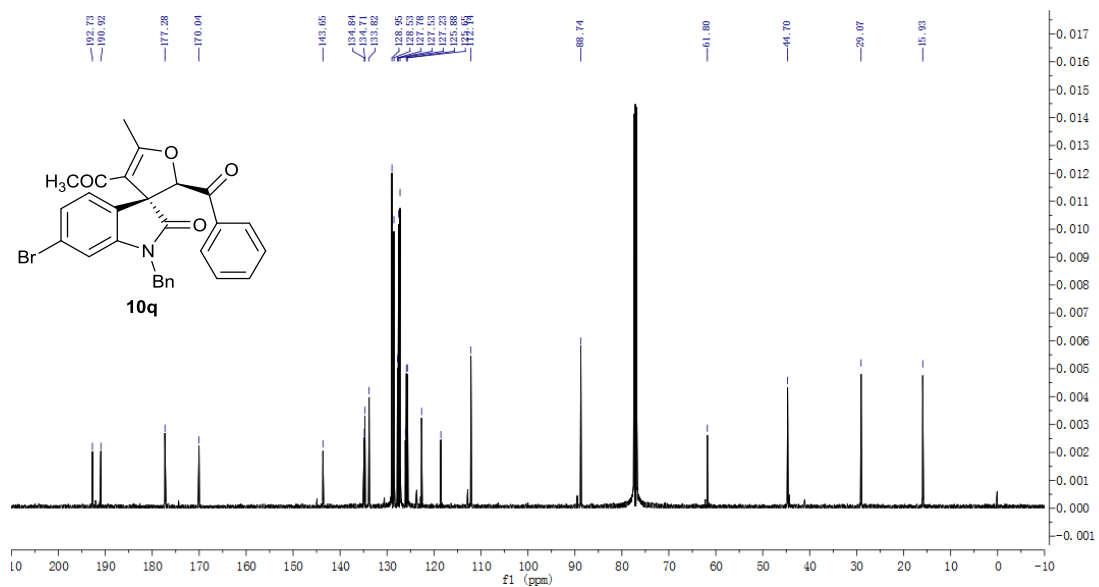

<sup>13</sup>C NMR spectrum of **10q** in CDCl<sub>3</sub>

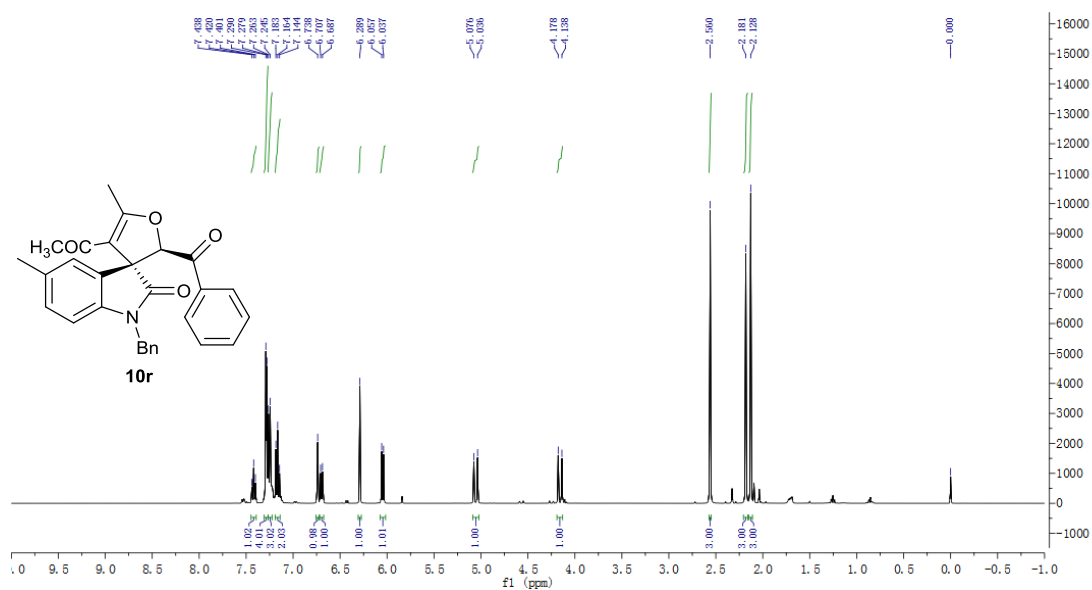

**<sup>1</sup>H NMR spectrum of 10r in CDCl<sub>3</sub> (d.r. = 18:1)**

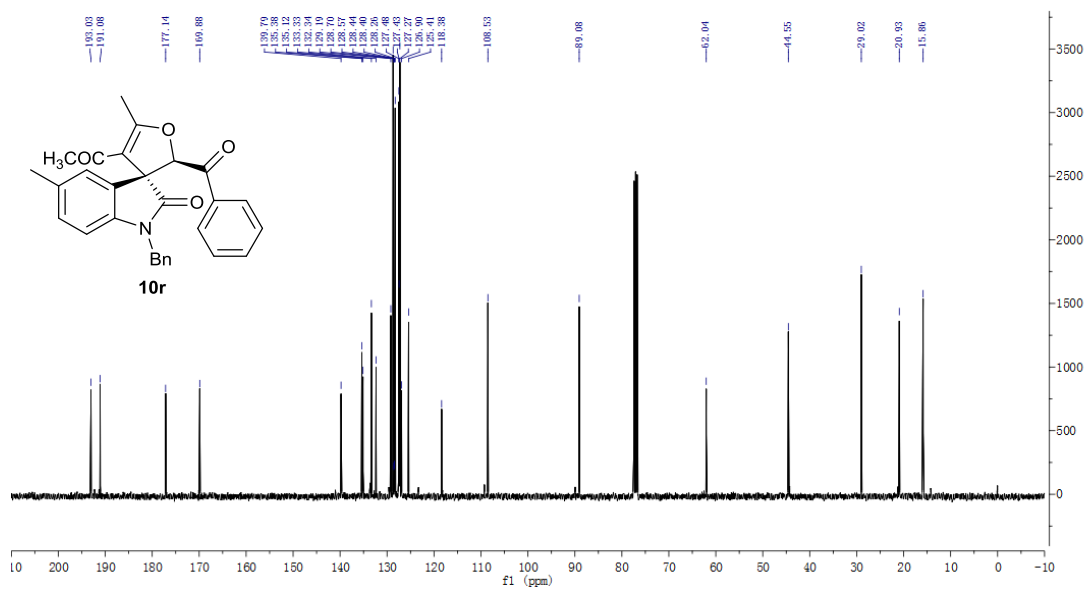

**<sup>13</sup>C NMR spectrum of 10r in CDCl<sub>3</sub>**

## HPLC Spectrum

### Peak Analysis Report

Detector A Channel 2 254nm

| No.   | Ret. Time | Height (mAu) | Area (mAu*min) | Rel. Area (%) |
|-------|-----------|--------------|----------------|---------------|
| 1     | 5.585     | 64711        | 821155         | 50.472        |
| 2     | 7.710     | 21661        | 805795         | 49.528        |
| Total |           | 86372        | 1626950        | 100.000       |

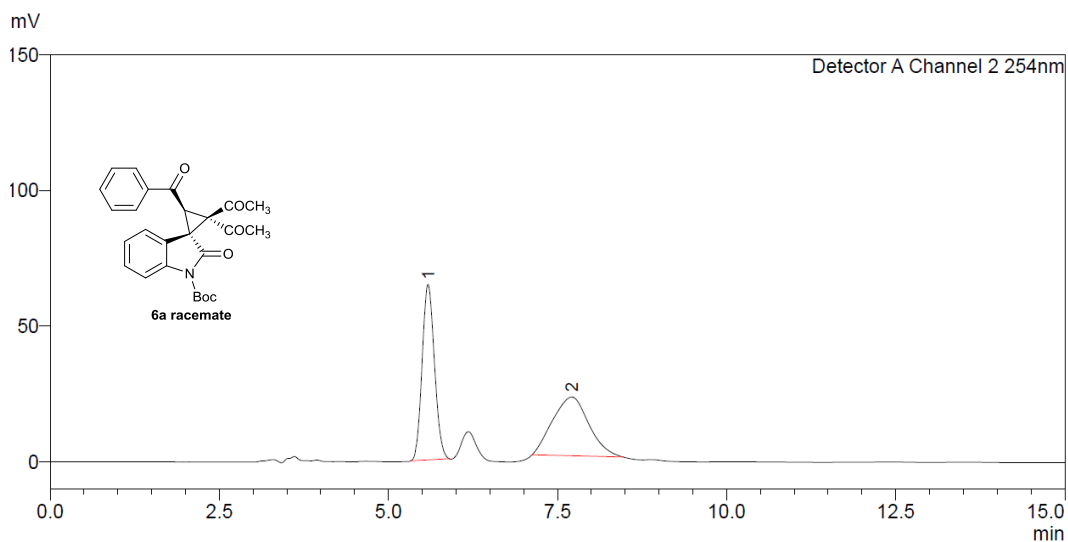

### Peak Analysis Report

Detector A Channel 2 254nm

| No.   | Ret. Time | Height (mAu) | Area (mAu*min) | Rel. Area (%) |
|-------|-----------|--------------|----------------|---------------|
| 1     | 5.577     | 315843       | 4097696        | 69.888        |
| 2     | 7.577     | 58781        | 1765578        | 30.112        |
| Total |           | 374624       | 5863274        | 100.000       |

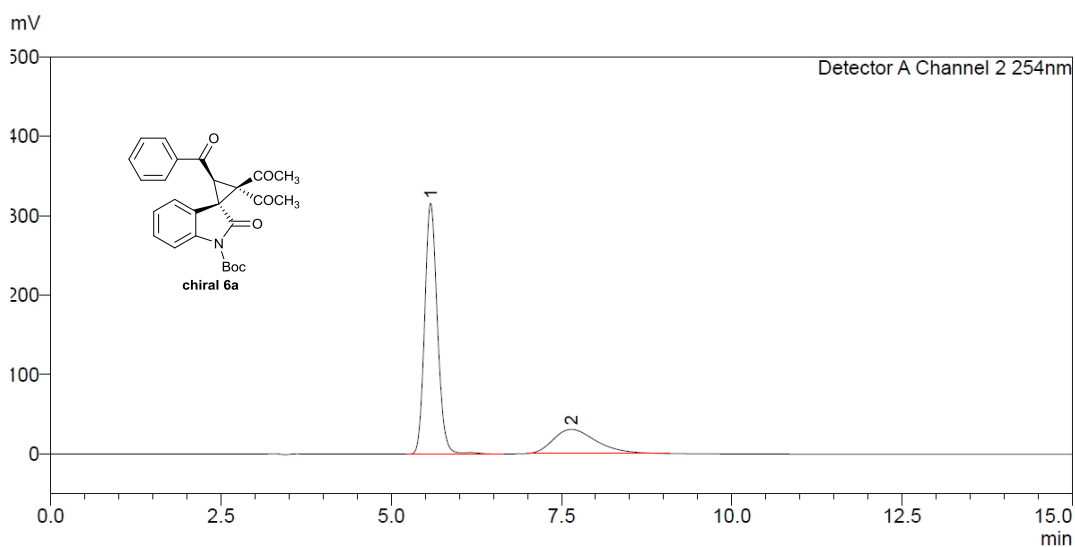

## Peak Analysis Report

Detector A Channel 2 254nm

| No.   | Ret. Time | Height (mAu) | Area (mAu*min) | Rel. Area (%) |
|-------|-----------|--------------|----------------|---------------|
| 1     | 7.768     | 100795       | 3948609        | 57.677        |
| 2     | 11.179    | 33268        | 2897464        | 42.323        |
| Total |           | 134063       | 6846072        | 100.000       |

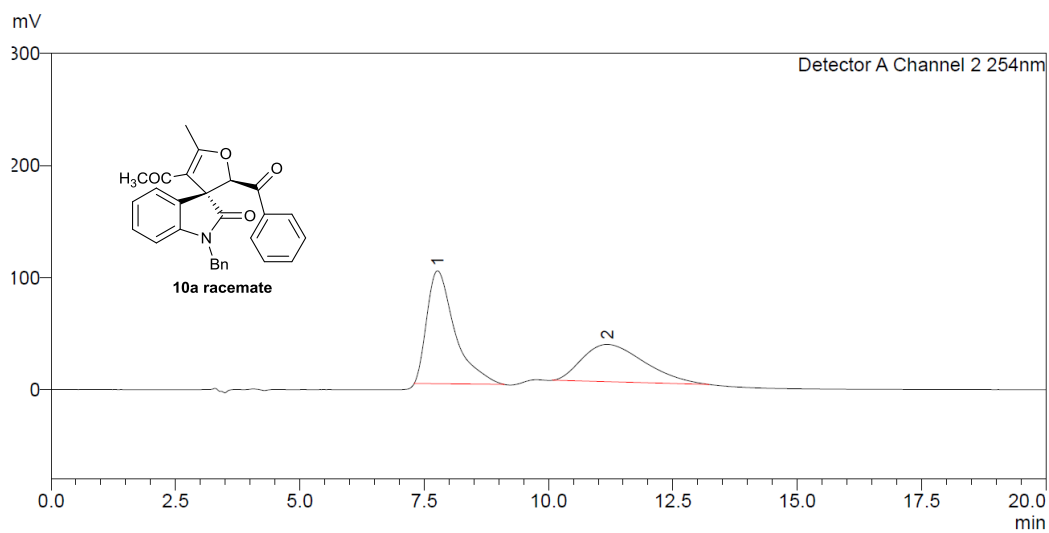

## Peak Analysis Report

Detector A Channel 2 254nm

| No.   | Ret. Time | Height (mAu) | Area (mAu*min) | Rel. Area (%) |
|-------|-----------|--------------|----------------|---------------|
| 1     | 7.876     | 102751       | 4190718        | 65.916        |
| 2     | 11.435    | 27532        | 2166958        | 34.084        |
| Total |           | 130283       | 6357676        | 100.000       |

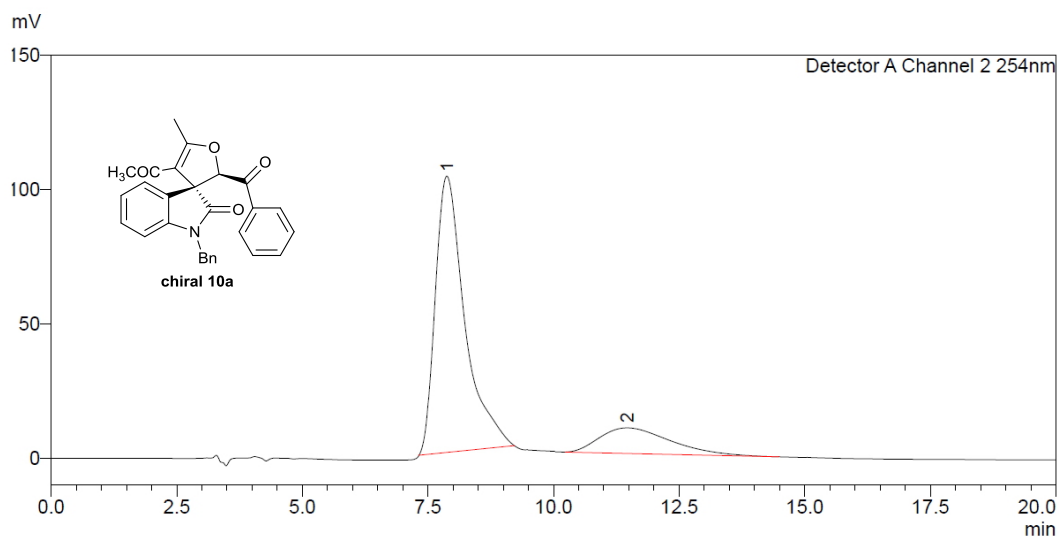

Supplement: c9ra02192b1.pdf [file c9ra02192b1.pdf]
